# Supplementary material for: Synthesis of silyl indenes by ruthenium-catalyzed aldehyde- and acylsilane-enabled C–H alkylation/cyclization
Source: Royal Society of Chemistry journal article supplement (doi:10.1039/d3ob01699d), 2023-12-15
Supplement: d3ob01699d1.pdf [file d3ob01699d1.pdf]

## Supporting Information

For the article entitled

# Synthesis of silyl indenenes by ruthenium catalyzed aldehyde and acylsilane enabled C–H alkylation/cyclization

Tao Zhang,<sup>a,b</sup> Cheng Zhang,<sup>b</sup> Xiunan Lu,<sup>b</sup> Chengxing Peng,<sup>b</sup> Yawei Zhang,<sup>b</sup> Xiong Zhu,<sup>a\*</sup> Guofu Zhong,<sup>b,c\*</sup> and Jian Zhang<sup>b\*</sup>

<sup>a</sup> School of Engineering, China Pharmaceutical University, No. 24, Tongjiaxiang, Nanjing 210009, Jiangsu Province, PR China.

<sup>b</sup> College of Material, Chemistry and Chemical Engineering, Key Laboratory of Organosilicon Chemistry and Material Technology, Ministry of Education, Hangzhou Normal University, Hangzhou, 311121 Zhejiang, China.

<sup>c</sup> Department of Chemistry, Eastern Institute for Advanced Study, Ningbo 315200, Zhejiang, China.

E-mail: cpuzx@foxmail.com; guofuzhong@eias.ac.cn; zhangjian@hznu.edu.cn

## Supporting Information

### Table of Contents

|                                             |       |
|---------------------------------------------|-------|
| General Consideration                       | SI-2  |
| Synthesis of Silyl Indenes                  | SI-3  |
| Mechanistic Experiments                     | SI-15 |
| Synthetic Applications                      | SI-20 |
| <sup>1</sup> H, <sup>13</sup> C NMR Spectra | SI-23 |
| X-Ray Crystallography Data                  | SI-63 |

## General Considerations

Analytical thin layer chromatography (TLC) was performed using Merck 60 F254 precoated silica gel plate (0.2 mm thickness). Subsequent to elution, plates were visualized using UV radiation (254 nm) on Spectroline Model ENF-24061/F 254 nm. Further visualization was possible by staining with basic solution of potassium permanganate or acidic solution of ceric molybdate. Flash column chromatography was performed using Merck aluminium oxide 90 active neutral with freshly distilled solvents. Columns were typically packed as slurry and equilibrated with the appropriate solvent system prior to use. Proton nuclear magnetic resonance spectra ( $^1\text{H}$  NMR) were recorded on Bruker AMX 500 spectrophotometer ( $\text{CDCl}_3$  as solvent). Chemical shifts for  $^1\text{H}$  NMR spectra are reported as  $\delta$  in units of parts per million (ppm) downfield from  $\text{SiMe}_4$  ( $\delta$  0.0) and relative to the signal of chloroform-d ( $\delta$  7.26, singlet). Multiplicities were given as: s (singlet), d (doublet), t (triplet), dd (doublets of doublet) or m (multiplets). The number of protons (n) for a given resonance is indicated by nH. Coupling constants are reported as a  $J$  value in Hz. Carbon nuclear magnetic resonance spectra ( $^{13}\text{C}$  NMR) are reported as  $\delta$  in units of parts per million (ppm) downfield from  $\text{SiMe}_4$  ( $\delta$  0.0) and relative to the signal of chloroform-d ( $\delta$  77.0, triplet). Mass spectrometry was performed by Waters Q-Tof Premier Micromass instrument, using Electro Spray Ionization (ESI) mode. IR spectra were recorded as thin films on KBr plates on a Bio-Rad FTS165 FTIR spectrometer and are reported in frequency of absorption ( $\text{cm}^{-1}$ ).  $[\text{Ru}(p\text{-cymene})\text{Cl}_2]_2$ ,  $\text{AgSbF}_6$  and  $\text{Cu}(\text{OAc})_2$  were purchased from TCI and used directly. Other reagents, unless otherwise noted below, are commercially available from TCI, Energy Chemical, Alfa Aesar (China) Chemical Co. Ltd. and used without further purification. Aroylsilanes were prepared by reported methods.

### General Procedure for the Ru-Catalyzed Synthesis of Sily Indenes 3

A screw-cap vial was charged with [Ru(*p*-cymene)Cl<sub>2</sub>]<sub>2</sub> (5 mol%, 0.01 mmol), AgSbF<sub>6</sub> (20 mol%, 0.04 mmol), Cu(OAc)<sub>2</sub> (1.3 equiv, 0.26 mmol) and DCM (1.0 mL). Then, aroylsilane **1** (1.0 equiv, 0.2 mmol) and acrolein **2** (3.0 equiv, 0.6 mmol) were added into the solution in sequence. The vial was sealed under argon and heated to 60 °C with stirring for 16 h. After cooling down, the mixture was directly applied to a flash column chromatography for separation (EtOAc/petroleum ether mixtures).

### Characterization Data

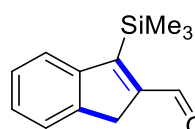

**3-(Trimethylsilyl)-1H-indene-2-carbaldehyde (3aa)** Following the general procedure, **3aa** was obtained as a white solid, m.p.: 60.5-62.8 °C, yield = 73%. <sup>1</sup>H NMR (500 MHz, CDCl<sub>3</sub>): δ = 10.26 (s, 1H), 7.77-7.73 (m, 1H), 7.56-7.54 (m, 1H), 7.38-7.33 (m, 2H), 3.72 (s, 2H), 0.51 (s, 9H). <sup>13</sup>C NMR (125 Hz, CDCl<sub>3</sub>): δ = 188.56, 160.80, 153.59, 146.31, 143.54, 127.03, 125.57, 124.24, 123.48, 37.26, 0.21. HRMS (ESI): m/z for C<sub>13</sub>H<sub>16</sub>OSi [M+H]<sup>+</sup>: 217.1043, found: 217.1042. FTIR (KBr, cm<sup>-1</sup>): 3450.19, 3410.97, 2956.89, 1643.81, 1658.52, 1538.35, 1402.49, 844.89.

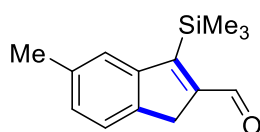

**5-Methyl-3-(trimethylsilyl)-1H-indene-2-carbaldehyde (3ba)**

Following the general procedure, **3ba** was obtained as a yellow solid, m.p.: 57.3-59.9 °C, yield = 68%. <sup>1</sup>H NMR (500 MHz, CDCl<sub>3</sub>): δ = 10.24 (s, 1H), 7.54 (s, 1H), 7.44 (d, *J* = 7.5 Hz, 1H), 7.19 (d, *J* = 7.5 Hz, 1H), 3.68 (s, 2H), 2.44 (s, 3H), 0.51 (s, 9H). <sup>13</sup>C NMR (125 Hz, CDCl<sub>3</sub>): δ = 188.55, 160.84, 153.81, 146.54, 140.59, 135.09, 128.02, 124.68, 123.05, 36.76, 20.46, 0.21. HRMS (ESI): m/z for C<sub>14</sub>H<sub>18</sub>OSi [M+H]<sup>+</sup>: 231.1200, found: 231.1211. FTIR (KBr, cm<sup>-1</sup>): 3444.57, 3176.13, 1659.72, 1651.56, 1455.14, 1402.44, 1253.81, 1015.45, 840.67, 802.07.

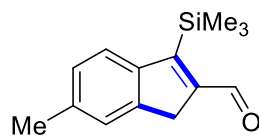

**6-Methyl-3-(trimethylsilyl)-1H-indene-2-carbaldehyde (3ca)** Following the general procedure, **3ca** was obtained as a yellow solid, m.p.: 77.4-78.2 °C, yield = 52%. <sup>1</sup>H NMR (500 MHz, CDCl<sub>3</sub>): δ = 10.22 (s, 1H), 7.63 (d, *J* = 8.0 Hz, 1H), 7.38 (s, 1H), 7.17 (d, *J* = 8.0 Hz, 1H), 3.68 (s, 2H), 2.42 (s, 3H), 0.49 (s, 9H). <sup>13</sup>C NMR (125 Hz, CDCl<sub>3</sub>): δ = 188.54, 161.08, 152.83, 143.99, 143.80, 137.50, 126.55, 124.24, 123.96, 36.97, 20.53, 0.21. HRMS (ESI): *m/z* for C<sub>14</sub>H<sub>18</sub>OSi [M+H]<sup>+</sup>: 231.1200, found: 231.1199. FTIR (KBr, cm<sup>-1</sup>): 3507.43, 3441.30, 3175.56, 3144.15, 1651.19, 1644.34, 1402.01, 1247.33, 844.90.

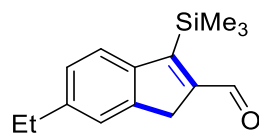

**6-Ethyl-3-(trimethylsilyl)-1H-indene-2-carbaldehyde (3da)** Following the general procedure, **3da** was obtained as a yellow solid, m.p.: 60.0-60.8 °C, yield = 62%. <sup>1</sup>H NMR (500 MHz, CDCl<sub>3</sub>): δ = 10.22 (s, 1H), 7.66 (d, *J* = 8.0 Hz, 1H), 7.40 (s, 1H), 7.19 (d, *J* = 8.0 Hz, 1H), 3.69 (s, 2H), 2.74-2.69 (q, *J* = 7.5 Hz, 2H), 1.27 (t, *J* = 7.5 Hz, 3H), 0.50 (s, 1H). <sup>13</sup>C NMR (125 Hz, CDCl<sub>3</sub>): δ = 188.50, 161.09, 152.95, 144.06, 144.04, 143.94, 125.46, 124.09, 123.02, 37.02, 27.93, 14.64, 0.21. HRMS (ESI): *m/z* for C<sub>15</sub>H<sub>20</sub>OSi [M+H]<sup>+</sup>: 245.1356, found: 245.1360. FTIR (KBr, cm<sup>-1</sup>): 3444.29, 3417.44, 3168.01, 2966.48, 1651.10, 1402.79, 1246.27, 843.90.

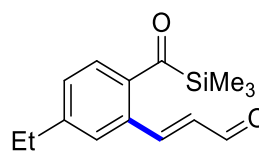

**(E)-3-(5-Ethyl-2-((trimethylsilyl) carbonyl) phenyl) acrylaldehyde (5da)** Following the general procedure, **3da** was obtained as a brown liquid, yield = 8%. <sup>1</sup>H NMR (500 MHz, CDCl<sub>3</sub>): δ = 9.74 (d, *J* = 8.0 Hz, 1H), 8.00 (d, *J* = 16.0 Hz, 1H), 7.73 (d, *J* = 8.0 Hz, 1H), 7.45 (s, 1H), 7.39 (d, *J* = 8.0 Hz, 1H), 6.57 (q, *J* = 8.0 Hz, 1H), 2.74 (q, *J* = 7.5 Hz, 2H), 1.29 (t, *J* = 7.5 Hz, 3H), 1.26 (s, 2H), 0.36 (s, 9H). <sup>13</sup>C NMR (125 Hz, CDCl<sub>3</sub>): δ = 195.97, 154.26, 150.21, 141.07, 134.17, 132.82, 132.38, 131.25, 129.73, 30.53, 16.77, 0.21. HRMS (ESI): *m/z* for C<sub>15</sub>H<sub>20</sub>O<sub>2</sub>Si [M+H]<sup>+</sup>: 261.1305, found: 261.1310. FTIR (KBr, cm<sup>-1</sup>): 3444.47, 3416.34, 3171.24, 2923.44, 2358.73, 1643.03, 1632.00, 1401.94.

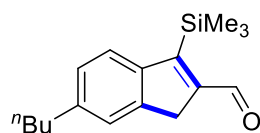

**6-Butyl-3-(trimethylsilyl)-1H-indene-2-carbaldehyde (3ea)** Following

the general procedure, **3ea** was obtained as a yellow liquid, yield = 65%.  $^1\text{H}$  NMR (500 MHz,  $\text{CDCl}_3$ ):  $\delta$  = 10.22 (s, 1H), 7.65 (d,  $J$  = 8.0 Hz, 1H), 7.38 (s, 1H), 7.17 (dd,  $J$  = 8.0 Hz,  $J$  = 1.5 Hz, 1H), 3.69 (s, 2H), 2.67 (t,  $J$  = 7.5 Hz, 2H), 1.66-1.60 (m, 2H), 1.41-1.35 (m, 2H), 0.94 (t,  $J$  = 7.5 Hz, 3H), 0.50 (s, 9H).  $^{13}\text{C}$  NMR (125 Hz,  $\text{CDCl}_3$ ):  $\delta$  = 188.51, 161.14, 152.89, 144.02, 143.93, 142.62, 125.98, 123.98, 123.54, 36.98, 34.67, 32.64, 21.26, 12.82, 0.21. HRMS (ESI):  $m/z$  for  $\text{C}_{17}\text{H}_{24}\text{OSi}$   $[\text{M}+\text{Na}]^+$ : 295.1489, found: 295.1498. FTIR (KBr,  $\text{cm}^{-1}$ ): 3472.50, 3444.54, 3417.37, 3175.09, 1651.34, 1644.55, 1504.69, 1402.46.

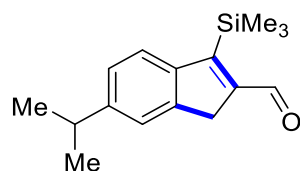

**6-Isopropyl-3-(trimethylsilyl)-1H-indene-2-carbaldehyde (3fa)**

Following the general procedure, **3fa** was obtained as a yellow solid, m.p.: 50.2-52.4 °C, yield = 67%.  $^1\text{H}$  NMR (500 MHz,  $\text{CDCl}_3$ ):  $\delta$  = 10.23 (d,  $J$  = 3.5 Hz, 1H), 7.68 (dd,  $J$  = 8.5 Hz,  $J$  = 3.0 Hz, 1H), 7.43 (s, 1H), 7.23 (d,  $J$  = 8.0 Hz, 1H), 3.70 (d,  $J$  = 2.0 Hz, 2H), 3.02-2.93 (m, 1H), 1.29 (dd,  $J$  = 7.0 Hz,  $J$  = 2.0 Hz, 6H), 0.50 (d,  $J$  = 2.5 Hz, 9H).  $^{13}\text{C}$  NMR (125 Hz,  $\text{CDCl}_3$ ):  $\delta$  = 188.47, 161.06, 153.04, 148.56, 144.23, 144.01, 124.10, 124.08, 121.50, 37.07, 33.19, 22.92, 0.21. HRMS (ESI):  $m/z$  for  $\text{C}_{16}\text{H}_{22}\text{OSi}$   $[\text{M}+\text{Na}]^+$ : 281.1332, found: 281.1332. FTIR (KBr,  $\text{cm}^{-1}$ ): 3452.60, 3417.27, 2958.38, 1658.87, 1402.63, 1384.70, 1251.86, 841.72.

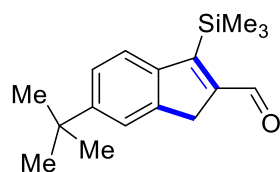

**6-(Tert-butyl)-3-(trimethylsilyl)-1H-indene-2-carbaldehyde (3ga)**

Following the general procedure, **3ga** was obtained as a yellow liquid, yield = 61%.  $^1\text{H}$  NMR (500 MHz,  $\text{CDCl}_3$ ):  $\delta$  = 10.23 (s, 1H), 7.69 (d,  $J$  = 8.0 Hz, 1H), 7.60 (d,  $J$  = 0.5 Hz, 1H), 7.41 (dd,  $J$  = 8.0 Hz,  $J$  = 1.5 Hz, 1H), 3.71 (s, 2H), 1.36 (s, 9H), 0.50 (s, 9H).  $^{13}\text{C}$  NMR (125 Hz,  $\text{CDCl}_3$ ):  $\delta$  = 188.49, 161.01, 153.21, 150.79, 143.79, 143.73, 123.80, 122.90, 120.45, 37.22, 33.85, 30.30, 0.21. HRMS (ESI):  $m/z$  for  $\text{C}_{17}\text{H}_{24}\text{OSi}$   $[\text{M}+\text{H}]^+$ : 273,1669, found: 273.1673. FTIR (KBr,  $\text{cm}^{-1}$ ): 3444.53,

3417.81, 3174.82, 1659.95, 1651.53, 1455.12, 1398.33, 840.03.

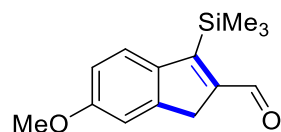

**6-Methoxy-3-(trimethylsilyl)-1H-indene-2-carbaldehyde (3ha)**

Following the general procedure, **3ha** was obtained as a yellow solid, m.p.: 121.8-123.1 °C, yield = 51%. <sup>1</sup>H NMR (500 MHz, CDCl<sub>3</sub>): δ = 10.17 (s, 1H), 7.64 (d, *J* = 9.0 Hz, 1H), 7.10 (d, *J* = 2.0 Hz, 1H), 6.91 (dd, *J* = 8.5 Hz, *J* = 2.5 Hz, 1H), 3.86 (s, 3H), 3.69 (s, 2H), 0.49 (s, 9H). <sup>13</sup>C NMR (125 Hz, CDCl<sub>3</sub>): δ = 187.98, 161.23, 159.31, 151.83, 146.17, 139.4, 125.07, 112.26, 108.63, 54.39, 37.22, 0.21. HRMS (ESI): *m/z* for C<sub>14</sub>H<sub>18</sub>O<sub>2</sub>Si [M+H]<sup>+</sup>: 247.1149, found: 247.1148. FTIR (KBr, cm<sup>-1</sup>): 3584.82, 3472.65, 3444.32, 3175.42, 1659.84, 1644.79, 1402.44, 1182.43.

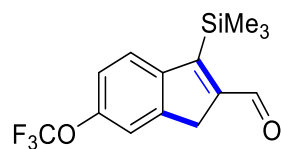

**6-(Trifluoromethoxy)-3-(trimethylsilyl)-1H-indene-2-carbaldehyde (3ia)**

Following the general procedure, **3ia** was obtained as a white solid, m.p.: 75.6-76.9 °C, yield = 62%. <sup>1</sup>H NMR (500 MHz, CDCl<sub>3</sub>): δ = 10.24 (s, 1H), 7.74 (d, *J* = 11.0 Hz, 1H), 7.41 (s, 1H), 7.22 (dd, *J* = 8.5 Hz, *J* = 1.0 Hz, 1H), 3.75 (s, 2H), 0.51 (s, 9H). <sup>13</sup>C NMR (125 Hz, CDCl<sub>3</sub>): δ = 188.25, 159.46, 154.47, 148.24 (d, *J*<sub>C-F</sub> = 1.6 Hz), 145.56, 144.97, 125.07, 119.49 (q, *J*<sub>C-F</sub> = 255.9 Hz), 118.62, 116.34, 37.66, 0.22. HRMS (ESI): *m/z* for C<sub>14</sub>H<sub>15</sub>F<sub>3</sub>O<sub>2</sub>Si [M+Na]<sup>+</sup>: 323.0686, found: 323.0694. FTIR (KBr, cm<sup>-1</sup>): 3473.08, 3416.85, 3384.55, 3225.49, 1659.96, 1402.54, 1254.56, 1158.41, 840.66.

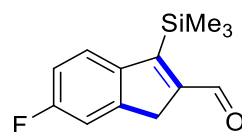

**6-Fluoro-3-(trimethylsilyl)-1H-indene-2-carbaldehyde (3ja)**

Following the general procedure, **3ja** was obtained as a white solid, m.p.: 98.4-105.1 °C, yield = 71%. <sup>1</sup>H NMR (500 MHz, CDCl<sub>3</sub>): δ = 10.21 (s, 1H), 7.68 (dd, *J* = 8.5 Hz, *J* = 5.0 Hz, 1H), 7.25 (d, *J* = 8.5 Hz, 1H), 7.06 (td, *J* = 8.5 Hz, *J* = 2.0 Hz, 1H), 3.71 (s, 2H), 0.50 (s, 9H). <sup>13</sup>C NMR (125 Hz, CDCl<sub>3</sub>): δ = 188.13, 162.07 (d, *J*<sub>C-F</sub> = 247.4 Hz), 160.02, 153.51 (d, *J*<sub>C-F</sub> = 3.9 Hz), 146.16 (d, *J*<sub>C-F</sub> = 9.1 Hz), 142.44 (d, *J*<sub>C-F</sub> = 2.3 Hz), 125.30 (d, *J*<sub>C-F</sub> = 9.1 Hz), 113.08 (d, *J*<sub>C-F</sub> = 23 Hz), 110.92 (d, *J*<sub>C-F</sub> = 22.8 Hz), 37.49 (d, *J*<sub>C-F</sub> = 2.5 Hz), 0.21. HRMS (ESI): *m/z* for C<sub>13</sub>H<sub>15</sub>FOSi [M+H]<sup>+</sup>:

235.0949, found: 235.0954. FTIR (KBr,  $\text{cm}^{-1}$ ): 3472.65, 3444.32, 3175.42, 1659.84, 1651.59, 1402.44, 1182.43, 841.78.

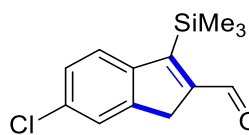

**6-Chloro-3-(trimethylsilyl)-1H-indene-2-carbaldehyde (3ka)** Following the general procedure, **3ka** was obtained as a white solid, m. p.: 92.7-93.2 °C, yield = 58%.  $^1\text{H}$  NMR (500 MHz,  $\text{CDCl}_3$ ):  $\delta$  = 10.23 (s, 1H), 7.64 (d,  $J$  = 8.0 Hz, 1H), 7.53 (s, 1H), 7.33 (dd,  $J$  = 8.5 Hz,  $J$  = 2.0 Hz, 1H), 3.70 (s, 2H), 0.50 (s, 9H).  $^{13}\text{C}$  NMR (125 Hz,  $\text{CDCl}_3$ ):  $\delta$  = 188.40, 159.80, 153.72, 145.29, 144.89, 133.37, 126.09, 125.03, 123.92, 37.32, 0.22. HRMS (ESI):  $m/z$  for  $\text{C}_{13}\text{H}_{15}\text{ClOSi}$   $[\text{M}+\text{Na}]^+$ : 273.0473, found: 273.0471. FTIR (KBr,  $\text{cm}^{-1}$ ): 3443.88, 3417.49, 3175.63, 1660.84, 1402.39, 1241.12, 845.57, 818.75.

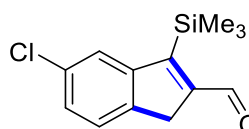

**5-Chloro-3-(trimethylsilyl)-1H-indene-2-carbaldehyde (3la)** Following the general procedure, **3la** was obtained as a yellow liquid, yield = 28%.  $^1\text{H}$  NMR (500 MHz,  $\text{CDCl}_3$ ):  $\delta$  = 10.25 (s, 1H), 7.68 (d,  $J$  = 1.5 Hz, 1H), 7.47 (d,  $J$  = 8.0 Hz, 1H), 7.33 (dd,  $J$  = 8.0 Hz,  $J$  = 1.5 Hz, 1H), 3.69 (s, 2H), 0.51 (s, 9H).  $^{13}\text{C}$  NMR (125 Hz,  $\text{CDCl}_3$ ):  $\delta$  = 188.48, 159.60, 154.91, 148.01, 147.70, 131.64, 126.98, 124.43, 124.16, 37.06, 0.21. HRMS (ESI):  $m/z$  for  $\text{C}_{13}\text{H}_{15}\text{ClOSi}$   $[\text{M}+\text{Na}]^+$ : 273.0473, found: 273.0475. FTIR (KBr,  $\text{cm}^{-1}$ ): 3452.07, 3423.13, 3385.24, 2922.98, 2359.82, 1651.58, 1399.27, 841.79.

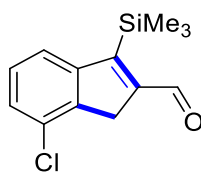

**7-Chloro-3-(trimethylsilyl)-1H-indene-2-carbaldehyde (3la')** Following the general procedure, **3la'** was obtained as a yellow liquid, yield = 17%.  $^1\text{H}$  NMR (500 MHz,  $\text{CDCl}_3$ ):  $\delta$  = 10.26 (s, 1H), 7.64 (dd,  $J$  = 7.5 Hz,  $J$  = 1.5 Hz, 1H), 7.35-7.30 (m, 2H), 3.75 (s, 2H), 0.51 (s, 9H).  $^{13}\text{C}$  NMR (125 Hz,  $\text{CDCl}_3$ ):  $\delta$  = 188.38, 160.08, 153.69, 147.83, 141.54, 129.72, 127.34, 127.05, 122.67, 37.39, 0.21. HRMS (ESI):  $m/z$  for  $\text{C}_{13}\text{H}_{15}\text{ClOSi}$   $[\text{M}+\text{Na}]^+$ : 273.0473, found: 273.0476. FTIR (KBr,  $\text{cm}^{-1}$ ): 3474.76, 3449.87, 3424.16, 2985.53, 2956.17, 2354.39, 1644.84, 1633.64, 1402.65.

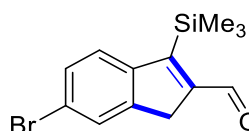

**6-Bromo-3-(trimethylsilyl)-1H-indene-2-carbaldehyde (3ma)** Following the general procedure, **3ma** was obtained as a yellow solid, m.p.: 118.1-121.0 °C, yield = 71%. <sup>1</sup>H NMR (500 MHz, CDCl<sub>3</sub>): δ = 10.24 (s, 1H), 7.68 (s, 1H), 7.58 (d, *J* = 8.5 Hz, 1H), 7.47 (d, *J* = 8.0 Hz, 1H), 3.69 (s, 2H), 0.50 (s, 9H). <sup>13</sup>C NMR (125 Hz, CDCl<sub>3</sub>): δ = 188.38, 159.75, 153.64, 145.53, 145.30, 128.94, 126.85, 125.35, 121.66, 37.33, 0.22. HRMS (ESI): *m/z* for C<sub>13</sub>H<sub>15</sub>BrOSi [M+Na]<sup>+</sup>: 316.9968, found: 316.9952. FTIR (KBr, cm<sup>-1</sup>): 3452.10, 3417.62, 3209.15, 1657.27, 1652.02, 1402.74, 844.84, 817.34.

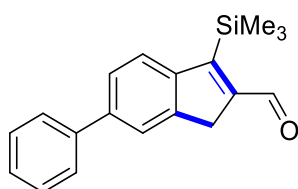

**6-Phenyl-3-(trimethylsilyl)-1H-indene-2-carbaldehyde (3na)**

Following the general procedure, **3na** was obtained as a yellow solid, m.p.: 138.5-140.7 °C, yield = 71%. <sup>1</sup>H NMR (500 MHz, CDCl<sub>3</sub>): δ = 10.28 (s, 1H), 7.83 (d, *J* = 8.0 Hz, 1H), 7.80 (s, 1H), 7.65 (d, *J* = 7.0 Hz, 2H), 7.62 (d, *J* = 8.0 Hz, 1H), 7.47 (t, *J* = 7.5 Hz, 2H), 7.38 (t, *J* = 7.0 Hz, 1H), 3.80 (s, 2H), 0.55 (s, 9H). <sup>13</sup>C NMR (125 Hz, CDCl<sub>3</sub>): δ = 188.42, 160.59, 153.70, 145.53, 144.32, 140.19, 139.68, 127.74, 126.45, 126.11, 124.79, 124.45, 122.15, 37.33, 0.21. HRMS (ESI): *m/z* for C<sub>19</sub>H<sub>20</sub>OSi [M+H]<sup>+</sup>: 293.1356, found: 293.1362. FTIR (KBr, cm<sup>-1</sup>): 3472.61, 3444.42, 3175.51, 1651.32, 1645.16, 1402.35, 1247.68, 849.32, 769.88.

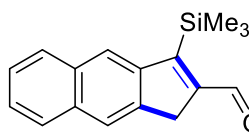

**3-(Trimethylsilyl)-1H-cyclopenta[b]naphthalene-2-carbaldehyde (3oa)**

Following the general procedure, **3oa** was obtained as a yellow solid, m.p.: 141.9-143.0 °C, yield = 64%. <sup>1</sup>H NMR (500 MHz, CDCl<sub>3</sub>): δ = 10.32 (s, 1H), 8.17 (s, 1H), 7.91 (d, *J* = 8 Hz, 2H), 7.83 (d, *J* = 7.5 Hz, 1H), 7.51-7.45 (m, 2H), 3.82 (s, 2H), 0.58 (t, *J* = 1.0 Hz, 9H). <sup>13</sup>C NMR (125 Hz, CDCl<sub>3</sub>): δ = 188.76, 160.11, 154.21, 145.15, 139.85, 132.05, 131.31, 127.47, 126.36, 125.26, 124.23, 123.47, 121.55, 36.12, 0.21. HRMS (ESI): *m/z* for C<sub>17</sub>H<sub>18</sub>OSi [M+H]<sup>+</sup>: 267.1200, found: 267.1192. FTIR (KBr, cm<sup>-1</sup>): 3472.65, 3444.32, 3175.42, 1651.59, 1644.79, 1402.44, 1182.43,



841.78.

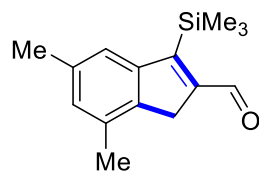

**5,7-Dimethyl-3-(trimethylsilyl)-1H-indene-2-carbaldehyde (3pa)**

Following the general procedure, **3pa** was obtained as a white solid, m.p.: 106.0-107.8 °C, yield = 25%. <sup>1</sup>H NMR (500 MHz, CDCl<sub>3</sub>): δ = 10.24 (s, 1H), 7.39 (s, 1H), 7.02 (s, 1H), 3.57 (s, 2H), 2.40 (s, 3H), 2.34 (s, 3H), 0.50 (s, 9H). <sup>13</sup>C NMR (125 Hz, CDCl<sub>3</sub>): δ = 188.57, 161.27, 153.1, 146.19, 139.46, 135.50, 132.37, 129.14, 122.34, 35.74, 20.35, 17.62, 0.21. HRMS (ESI): m/z for C<sub>15</sub>H<sub>20</sub>OSi [M+H]<sup>+</sup>: 245.1356, found: 245.1358. FTIR (KBr, cm<sup>-1</sup>): 3444.57, 3417.72, 3175.22, 1651.17, 1645.31, 1633.64, 1455.08, 1402.27.

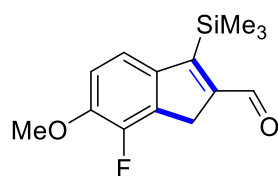

**5-Fluoro-6-methoxy-3-(trimethylsilyl)-1H-indene-2-carbaldehyde (3qa)**

Following the general procedure, **3ra** was obtained as a white solid, m.p.: 173.4-173.8 °C, yield = 74%. <sup>1</sup>H NMR (500 MHz, CDCl<sub>3</sub>): δ = 10.18 (s, 1H), 7.45 (d, *J* = 8.5 Hz, 1H), 6.98 (t, *J* = 8.0 Hz, 1H), 3.94 (s, 3H), 3.72 (s, 2H), 1.25 (s, 3H), 0.49 (s, 9H). <sup>13</sup>C NMR (125 Hz, CDCl<sub>3</sub>): δ = 187.91, 160.26, 152.43 (d, *J*<sub>C-F</sub> = 1.0 Hz), 147.6 (d, *J*<sub>C-F</sub> = 247.4 Hz), 147.06 (d, *J*<sub>C-F</sub> = 10.4 Hz), 141.33 (d, *J*<sub>C-F</sub> = 4.0 Hz), 130.27 (d, *J*<sub>C-F</sub> = 14.3 Hz), 120.23 (d, *J*<sub>C-F</sub> = 3.6 Hz), 111.34, 55.54, 33.90, 0.21. HRMS (ESI): m/z for C<sub>14</sub>H<sub>17</sub>FO<sub>2</sub>Si [M+H]<sup>+</sup>: 265.1055, found: 265.1060. FTIR (KBr, cm<sup>-1</sup>): 3416.48, 1682.17, 1634.67, 1620.57, 803.56, 618.45, 480.91.

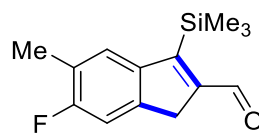

**6-Fluoro-5-methyl-3-(trimethylsilyl)-1H-indene-2-carbaldehyde (3ra)**

Following the general procedure, **3sa** was obtained as a white solid, m.p.: 105.1-105.7 °C, yield = 71%. <sup>1</sup>H NMR (500 MHz, CDCl<sub>3</sub>): δ = 10.19 (s, 1H), 7.52 (d, *J* = 7.0 Hz, 1H), 7.19 (d, *J* = 7.19 Hz, 1H), 3.67 (s, 2H), 2.34 (s, 3H), 0.51 (d, *J* = 1.0 Hz, 9H). <sup>13</sup>C NMR (125 Hz, CDCl<sub>3</sub>): δ = 188.06, 160.58 (d, *J*<sub>C-F</sub> = 246.5 Hz), 160.17, 153.48 (d, *J*<sub>C-F</sub> = 3.9 Hz), 143.38 (d, *J*<sub>C-F</sub> = 11.3 Hz), 142.22 (d, *J*<sub>C-F</sub> = 2.5 Hz), 126.55 (d, *J*<sub>C-F</sub> = 6.3 Hz), 122.38 (d, *J*<sub>C-F</sub> = 18.8 Hz), 110.31 (d, *J*<sub>C-F</sub> =

23.8 Hz), 37.15 (d,  $J_{C-F} = 2.5$  Hz), 13.92 (d,  $J_{C-F} = 3.8$  Hz), 0.21. HRMS (ESI):  $m/z$  for  $C_{14}H_{17}FOSi$   $[M+Na]^+$ : 271.0925, found: 271.0919. FTIR (KBr,  $cm^{-1}$ ): 3416.49, 1651.53, 1634.53, 1615.59, 838.39, 618.38, 469.84.

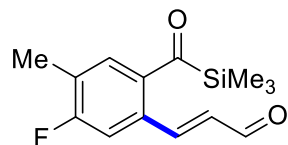

**(E)-3-(5-Fluoro-4-methyl-2-((trimethylsilyl)carbonyl) phenyl) acrylaldehyde (5ra)** Following the general procedure, **5ra** was obtained as a yellow solid, m.p.:

88.3-89.1 °C, yield = 6%.  $^1H$  NMR (500 MHz,  $CDCl_3$ ):  $\delta = 9.72$  (d,  $J = 7.5$  Hz, 1H), 7.90 (d,  $J = 16.0$  Hz, 1H), 7.60 (d,  $J = 7.0$  Hz, 1H), 6.52 (q,  $J = 8.0$  Hz, 1H), 2.39 (s, 3H), 0.37 (s, 9H).  $^{13}C$  NMR (125 Hz,  $CDCl_3$ ):  $\delta = 241.23$ , 195.54, 164.2 (d,  $J_{C-F} = 251.4$  Hz), 152.10 (d,  $J_{C-F} = 1.8$  Hz), 139.95 (d,  $J_{C-F} = 3.4$  Hz), 135.87 (d,  $J_{C-F} = 6.6$  Hz), 134.23 (d,  $J_{C-F} = 8.3$  Hz), 132.63, 129.08 (d,  $J_{C-F} = 17.9$  Hz), 116.57 (d,  $J_{C-F} = 23.6$  Hz), 16.52 (d,  $J_{C-F} = 2.9$  Hz), 0.21. HRMS (ESI):  $m/z$  for  $C_{14}H_{17}FO_2Si$   $[M+H]^+$ : 265.1055, found: 265.1057. FTIR (KBr,  $cm^{-1}$ ): 3441.64, 3418.32, 2900.10, 2359.36, 2329.81, 1682.78, 1402.63, 845.11.

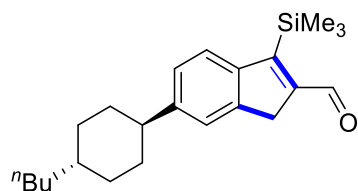

**6-((1s,4r)-4-Butylcyclohexyl)-3-(trimethylsilyl)-1H-indene-2-carbaldehyde (3sa)** Following the general procedure, **3ta** was obtained as a yellow solid, m.p.: 49.6-55.2 °C, yield = 6%.  $^1H$  NMR (500 MHz,  $CDCl_3$ ):  $\delta = 10.22$  (d,  $J = 2.0$  Hz, 1H), 7.66 (dd,  $J = 8.0$  Hz,  $J = 1.5$  Hz, 1H), 7.42 (s, 1H), 7.21 (d,  $J = 8.0$  Hz, 1H), 3.69 (s, 2H), 2.53 (t,  $J = 12.0$  Hz, 1H), 1.90 (t,  $J = 10.5$  Hz, 4H), 1.53-1.45 (m, 2H), 1.31 (d,  $J = 3.0$  Hz, 4H), 1.25 (d,  $J = 6.5$  Hz, 3H), 1.10-1.03 (m, 2H), 0.92-0.91 (m, 3H), 0.49 (d,  $J = 2.0$  Hz, 9H).  $^{13}C$  NMR (125 Hz,  $CDCl_3$ ):  $\delta = 188.44$ , 161.09, 153.00, 147.59, 144.24, 143.95, 124.50, 124.05, 121.92, 43.72, 37.06, 36.13, 35.94, 33.26, 32.42, 28.09, 21.87, 13.03, 0.21. HRMS (ESI):  $m/z$  for  $C_{23}H_{34}OSi$   $[M+Na]^+$ : 377.2271, found: 377.2277. FTIR (KBr,  $cm^{-1}$ ): 3452.48, 3417.55, 2955.86, 2921.81, 2851.66, 1659.70, 1393.30, 840.93.

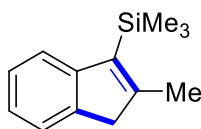

**Trimethyl (2-methyl-1H-inden-3-yl) silane (4ab)** Following the general procedure, **4ab** was obtained as a brown liquid, yield = 71%. <sup>1</sup>H NMR (500 MHz, CDCl<sub>3</sub>): δ = 7.42-7.37 (dd, *J* = 17.0 Hz, *J* = 7.5 Hz, 2H), 7.21 (t, *J* = 7.5 Hz, 1H), 7.08 (t, *J* = 7.0 Hz, 1H), 3.36 (s, 2H), 2.22 (s, 3H), 0.35 (s, 9H). <sup>13</sup>C NMR (125 Hz, CDCl<sub>3</sub>): δ = 155.43, 149.71, 142.82, 135.16, 125.55, 122.77, 122.63, 120.83, 45.95, 17.08, 0.21. HRMS (ESI): *m/z* for C<sub>13</sub>H<sub>18</sub>Si [M+Na]<sup>+</sup>: 225.1070, found: 225.1078. FTIR (KBr, cm<sup>-1</sup>): 3473.09, 3453.12, 3225.51, 1651.59, 1644.80, 1633.88, 1402.39, 1385.06.

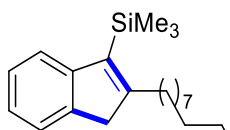

**(2-Decyl-1H-inden-3-yl)trimethylsilane (4ac)** Following the general procedure, **4ad** was obtained as a yellow liquid, yield = 51%. <sup>1</sup>H NMR (500 MHz, CDCl<sub>3</sub>): δ = 7.44-7.41 (m, 1H), 7.39 (d, *J* = 7.5 Hz, 1H), 7.22-7.19 (m, 1H), 7.10-7.06 (m, 1H), 3.39 (s, 2H), 2.58-2.54 (m, 2H), 1.53 (s, 2H), 1.31-1.26 (m, 14H), 0.89-0.86 (m, 3H), 0.35 (d, *J* = 4.5 Hz, 9H). <sup>13</sup>C NMR (125 Hz, CDCl<sub>3</sub>): δ = 160.55, 149.31, 142.80, 134.82, 125.33, 122.59, 122.58, 120.87, 31.32, 31.19, 30.51, 29.25, 29.04, 28.75, 22.10, 13.53, 0.21. HRMS (ESI): *m/z* for C<sub>22</sub>H<sub>36</sub>Si [M+Na]<sup>+</sup>: 351.2478, found: 351.2479. FTIR (KBr, cm<sup>-1</sup>): 3444.37, 3417.69, 3224.58, 1651.39, 1644.67, 1633.68, 1402.64, 1384.98.

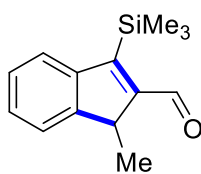

**1-Methyl-3-(trimethylsilyl)-1H-indene-2-carbaldehyde (4ad)**

Following the general procedure, **4ae** was obtained as a yellow liquid, yield = 68%. <sup>1</sup>H NMR (500 MHz, CDCl<sub>3</sub>): δ = 10.25 (s, 1H), 7.73 (d, *J* = 7.5 Hz, 1H), 7.50 (d, *J* = 32.0 Hz, 1H), 7.40-7.32 (m, 2H), 3.82 (q, *J* = 7.5 Hz, 1H), 1.42 (d, *J* = 7.5 Hz, 3H), 0.50 (s, 9H). <sup>13</sup>C NMR (125 Hz, CDCl<sub>3</sub>): δ = 188.58, 159.88, 158.13, 150.21, 144.48, 127.13, 125.61, 124.23, 122.34, 43.64, 15.61, 0.21. HRMS (ESI): *m/z* for C<sub>14</sub>H<sub>18</sub>OSi [M+H]<sup>+</sup>: 231.1200, found: 231.1208. FTIR (KBr, cm<sup>-1</sup>): 3444.57, 3417.74, 3159.92, 2358.08, 1651.59, 1402.60, 1251.77, 841.25.

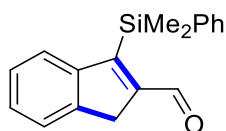

**3-(Dimethyl(phenyl)silyl)-1H-indene-2-carbaldehyde (3ua)** Following the general procedure, **3ua** was obtained as a yellow liquid, yield = 55%.  $^1\text{H}$  NMR (500 MHz,  $\text{CDCl}_3$ ):  $\delta$  = 9.96 (s, 1H), 7.58-7.57 (m, 1H), 7.55(d,  $J$  = 7.5 Hz, 1H), 7.50 (d,  $J$  = 8.0 Hz, 1H), 7.41-7.37 (m, 2H), 7.33 (t,  $J$  = 7.0 Hz, 1H), 7.25-7.22 (m, 1H), 3.75 (s, 2H), 0.75 (s, 6H).  $^{13}\text{C}$  NMR (125 Hz,  $\text{CDCl}_3$ ):  $\delta$  = 189.92, 159.70, 155.75, 147.43, 144.57, 137.29, 133.86, 129.86, 128.39, 128.16, 126.70, 125.71, 124.51, 38.58, 0.22. HRMS (ESI):  $m/z$  for  $\text{C}_{18}\text{H}_{18}\text{OSi}$   $[\text{M}+\text{Na}]^+$ : 301.1019, found: 301.1027. FTIR (KBr,  $\text{cm}^{-1}$ ): 3456.29, 3417.61, 2935.88, 2851.09, 2361.94, 2339.90, 1658.84, 1402.23.

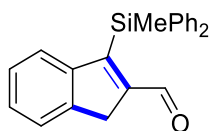

**3-(Methyldiphenylsilyl)-1H-indene-2-carbaldehyde (3va)** Following the general procedure, **3va** was obtained as a yellow liquid, yield = 68%.  $^1\text{H}$  NMR (500 MHz,  $\text{CDCl}_3$ ):  $\delta$  = 9.54 (s, 1H), 7.58-7.54 (m, 5H), 7.45-7.42 (m, 2H), 7.39-7.36 (m, 4H), 7.32-7.29 (m, 1H), 7.22 (d,  $J$  = 8.0 Hz, 1H), 7.13 (t,  $J$  = 7.5 Hz, 1H), 3.79 (s, 2H), 1.02 (s, 3H).  $^{13}\text{C}$  NMR (125 Hz,  $\text{CDCl}_3$ ):  $\delta$  = 191.80, 159.17, 158.23, 149.01, 145.96, 136.80, 136.44, 131.67, 129.97, 129.67, 128.17, 127.65, 125.91, 40.30, 0.22. HRMS (ESI):  $m/z$  for  $\text{C}_{23}\text{H}_{20}\text{OSi}$   $[\text{M}+\text{Na}]^+$ : 363.1176, found: 363.1168. FTIR (KBr,  $\text{cm}^{-1}$ ): 3443.58, 3416.79, 1682.25, 1659.24, 1651.52, 1634.20, 1634.20, 1402.54.

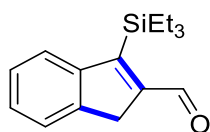

**3-(Triethylsilyl)-1H-indene-2-carbaldehyde (3wa)** Following the general procedure, **3wa** was obtained as a yellow liquid, yield = 68%.  $^1\text{H}$  NMR (500 MHz,  $\text{CDCl}_3$ ):  $\delta$  = 10.18 (d,  $J$  = 2.0 Hz, 1H), 7.77 (d,  $J$  = 7.5 Hz, 1H), 7.56 (d,  $J$  = 6.5 Hz, 1H), 7.38-7.33 (m, 2H), 3.75 (s, 2H), 1.02 (d,  $J$  = 2.0 Hz, 15H).  $^{13}\text{C}$  NMR (125 Hz,  $\text{CDCl}_3$ ):  $\delta$  = 185.12, 154.79, 151.36, 142.79, 139.69, 123.15, 121.73, 120.34, 119.53, 33.57, 2.49, 0.21. HRMS (ESI):  $m/z$  for  $\text{C}_{16}\text{H}_{22}\text{OSi}$   $[\text{M}+\text{H}]^+$ : 259.1513, found: 259.1512. FTIR (KBr,  $\text{cm}^{-1}$ ): 3455.33, 3433.69, 3206.49, 1679.61, 1649.52, 1642.94, 1537.47.

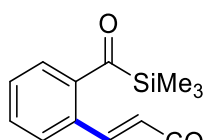

**(E)-1-(2-((trimethylsilyl) carbonyl) phenyl) pent-1-en-3-one (5af)**

Following the general procedure, **5af** was obtained as a yellow liquid, yield = 19%. <sup>1</sup>H NMR (500 MHz, CDCl<sub>3</sub>): δ = 7.68 (d, *J* = 16.5 Hz, 1H), 7.65-7.61 (m, 2H), 7.51-7.47 (m, 2H), 6.53 (d, *J* = 16.0 Hz, 1H), 2.73 (q, *J* = 7.5 Hz, 2H), 1.17 (t, *J* = 7.5 Hz, 3H), 0.33 (s, 9H). <sup>13</sup>C NMR (125 Hz, CDCl<sub>3</sub>): δ = 243.67, 203.10, 144.54, 143.48, 134.69, 133.15, 131.34, 131.29, 131.02, 130.10, 35.21, 10.07, 0.21.

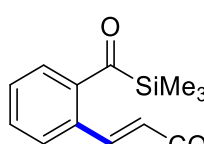

**Methyl (E)-3-(2-((trimethylsilyl) carbonyl) phenyl) acrylate (5ag)**

Following the general procedure, **5ag** was obtained as a yellow liquid, yield = 31%. <sup>1</sup>H NMR (500 MHz, CDCl<sub>3</sub>): δ = 7.95 (d, *J* = 16.0 Hz, 1H), 7.60-7.57 (m, 2H), 7.50-7.46 (m, 2H), 6.28 (d, *J* = 16.0 Hz, 1H), 3.81 (d, *J* = 1.5 Hz, 3H), 0.32 (d, *J* = 1.0 Hz, 9H). <sup>13</sup>C NMR (125 Hz, CDCl<sub>3</sub>): δ = 243.90, 168.98, 145.76, 145.09, 134.36, 133.08, 131.46, 130.84, 130.17, 122.53, 53.77, 0.21.

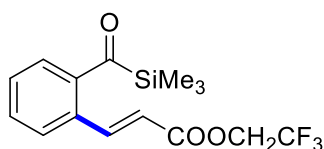

**2,2,2-Trifluoroethyl(E)-3-(2-((trimethylsilyl) carbonyl) phenyl) acrylate (5ah)**

Following the general procedure, **5ah** was obtained as a yellow liquid, yield = 66%. <sup>1</sup>H NMR (500 MHz, CDCl<sub>3</sub>): δ = 8.03 (d, *J* = 16.0 Hz, 1H), 7.61-7.59 (m, 2H), 7.52-7.47 (m, 2H), 6.31 (dd, *J* = 16.0 Hz, *J* = 1.0 Hz, 1H), 4.58 (q, *J* = 8.5 Hz, 2H), 0.31 (d, *J* = 1.0 Hz, 9H). <sup>13</sup>C NMR (125 Hz, CDCl<sub>3</sub>): δ = 243.67, 166.80, 148.41, 145.20, 133.91, 133.24, 131.96, 131.10, 130.35, 125.13 (q, *J*<sub>C-F</sub> = 275.6 Hz), 120.39, 62.43 (q, *J*<sub>C-F</sub> = 36.4 Hz), 0.21. HRMS (ESD): *m/z* for C<sub>15</sub>H<sub>17</sub>F<sub>3</sub>O<sub>3</sub>Si [M+H]<sup>+</sup>: 331.0972, found: 331.0974. FTIR (KBr, cm<sup>-1</sup>): 3441.26, 3423.74, 3199.39, 2921.62, 2851.15, 1633.67, 1539.48, 1402.81.

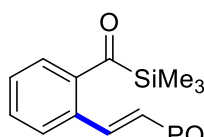

**Diethyl (E)-2-((trimethylsilyl) carbonyl) styryl phosphonate**

**(5ai)** Following the general procedure, **5ai** was obtained as a yellow solid, m.p.: 74.2 °C, yield = 69%. <sup>1</sup>H NMR (500 MHz, CDCl<sub>3</sub>): δ = 7.71-7.64 (dd, *J* = 22.5 Hz, *J* = 17.5 Hz, 1H), 7.59-7.54 (m, 2H), 7.48-7.46 (m, 2H), 6.15-6.07 (m, 1H), 4.20-4.14 (m, 4H), 1.38-1.35 (td, *J* = 7.0 Hz, *J* = 1.5 Hz, 6H), 0.32-0.31 (m, 9H). <sup>13</sup>C NMR (125 Hz, CDCl<sub>3</sub>): δ = 243.86, 149.25 (d, *J*<sub>C-P</sub> = 7.1 Hz), 144.81, 134.99 (d, *J*<sub>C-P</sub> = 23.8 Hz), 133.05, 131.32, 130.74, 130.02 (d, *J*<sub>C-P</sub> = 1.3 Hz), 119.69, 118.18, 64.07 (d, *J*<sub>C-P</sub> = 5.5 Hz), 18.43 (d, *J*<sub>C-P</sub> = 6.5 Hz), 0.21.

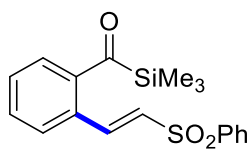

**(E)-2-(2-(phenylsulfonyl) vinyl) phenyl (trimethylsilyl) methanone (5aj)** Following the general procedure, **5aj** was obtained as a yellow liquid, yield = 79%. <sup>1</sup>H NMR (500 MHz, CDCl<sub>3</sub>): δ = 8.05-8.03 (m, 2H), 7.97 (d, *J* = 15 Hz, 1H), 7.68 (d, *J* = 7.5 Hz, 1H), 7.62-7.48 (m, 6H), 6.69 (d, *J* = 15.0 Hz, 1H), 0.34 (s, 9H). <sup>13</sup>C NMR (125 Hz, CDCl<sub>3</sub>): δ = 242.56, 144.68, 144.66, 142.56, 135.27, 133.30, 132.38, 132.04, 131.49, 131.23, 131.13, 130.63, 129.72, 0.21.

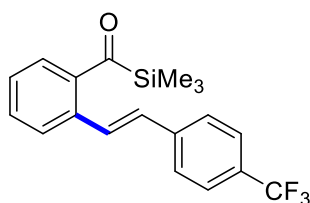

**(E)-2-(4-(Trifluoromethyl) styryl) phenyl (trimethylsilyl) methanone (5ak)** Following the general procedure, **5ak** was obtained as a yellow solid, m.p.: 62.5 °C, yield = 53%. <sup>1</sup>H NMR (500 MHz, CDCl<sub>3</sub>): δ = 7.67 (d, *J* = 8.0 Hz, 1H), 7.61-7.58 (m, 5H), 7.56-7.54 (dd, *J* = 8.0 Hz, *J* = 1.5 Hz, 1H), 7.45 (t, *J* = 7.5 Hz, 1H), 7.40 (t, *J* = 7.0 Hz, 1H), 6.91 (d, *J* = 16.0 Hz, 1H), 0.30 (s, 9H). <sup>13</sup>C NMR (125 Hz, CDCl<sub>3</sub>): δ = 244.76, 143.98, 142.67, 136.50, 132.90, 132.32, 131.81, 131.38 (q, *J*<sub>C-F</sub> = 32.3 Hz), 130.92, 129.71, 129.41, 128.82, 127.57 (q, *J*<sub>C-F</sub> = 3.8 Hz), 126.17 (q, *J*<sub>C-F</sub> = 270.1 Hz)

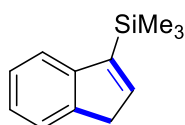

**(1H-Inden-3-yl)trimethylsilane (4aa)** Following the general procedure, **4aa** was obtained as a yellow liquid, yield = 3%. <sup>1</sup>H NMR (500 MHz, CDCl<sub>3</sub>): δ = 7.39-7.36 (m, 2H),

7.18-7.14 (m, 1H), 7.08-7.04 (m, 1H), 6.65-6.63 (m, 1H), 3.29 (d,  $J = 2.5$  Hz, 2H), 0.22-0.19 (m, 9H).  $^{13}\text{C}$  NMR (125 Hz,  $\text{CDCl}_3$ ):  $\delta = 149.35, 146.51, 145.96, 145.36, 127.39, 125.55, 125.07, 123.27, 42.03, 0.21$  (d,  $J = 3.0$  Hz). HRMS (ESI):  $m/z$  for  $\text{C}_{12}\text{H}_{16}\text{Si}$   $[\text{M}+\text{Na}]^+$ : 211.0913, found: 211.0910. FTIR (KBr,  $\text{cm}^{-1}$ ): 3493.29, 3416.36, 3300.24, 2367.89, 2289.63, 1658.81, 1643.78, 1632.84.

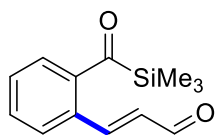

**(E)-3-(2-((Trimethylsilyl) carbonyl) phenyl) acrylaldehyde (5aa)**

Following the general procedure, **5aa** was obtained as a yellow liquid, yield = 2%.  $^1\text{H}$  NMR (500 MHz,  $\text{CDCl}_3$ ):  $\delta = 9.73$  (d,  $J = 8.0$  Hz, 1H), 7.93 (d,  $J = 16.0$  Hz, 1H), 7.76-7.74 (m, 1H), 7.66-7.65 (m, 1H), 7.58-7.52 (m, 2H), 6.58 (q,  $J = 8.0$  Hz, 1H), 0.36 (s, 9H).  $^{13}\text{C}$  NMR (125 Hz,  $\text{CDCl}_3$ ):  $\delta = 243.15, 195.95, 153.60, 143.86, 133.85, 133.41, 132.71, 131.97, 131.97, 130.29, 0.22$ . HRMS (ESI):  $m/z$  for  $\text{C}_{13}\text{H}_{16}\text{O}_2\text{Si}$   $[\text{M}+\text{H}]^+$ : 233.0992, found: 233.0997. FTIR (KBr,  $\text{cm}^{-1}$ ): 3443.12, 3422.59, 2923.97, 2850.63, 2354.42, 1643.25, 1632.39, 1402.04.

### Competition Experiments with **1k** and **1h**:

A screw-cap vial was charged with  $[\text{Ru}(p\text{-cymene})\text{Cl}_2]_2$  (5 mol%, 0.005 mmol, 3.1 mg),  $\text{AgSbF}_6$  (20 mol%, 0.02 mmol, 6.9 mg),  $\text{Cu}(\text{OAc})_2$  (1.3 equiv, 0.13 mmol, 23.6 mg) and DCM (0.5 mL). Then, aroylsilanes **1k** (1.0 equiv, 0.1 mmol, 21.2 mg), **1h** (1.0 equiv, 0.1 mmol, 20.8 mg) and **2a** (3.0 equiv, 0.3 mmol, 16.8 mg) were added into the solution in sequence. The vial was sealed under argon and heated to 60 °C with stirring for 1 h. After cooling down, the mixture was directly applied to a flash column chromatography (EtOAc/petroleum ether mixtures), only leading to product **3ha** (8.4 mg, 32%).

### H/D Exchange Experiment

A screw-cap vial was charged with  $[\text{Ru}(p\text{-cymene})\text{Cl}_2]_2$  (5 mol%, 0.005 mmol),  $\text{AgSbF}_6$  (20 mol%, 0.02 mmol),  $\text{Cu}(\text{OAc})_2$  (1.3 equiv, 0.13 mmol) and DCM (0.5 mL). Then, **1a-d5** (1.0 equiv, 0.1 mmol) and **2a** (3.0 equiv, 0.3 mmol) were added into the solution in sequence. The vial was sealed under argon and heated to 60 °C with stirring for 15 min. After cooling down, the mixture was

directly applied to a flash column chromatography (EtOAc/petroleum ether mixtures), affording **3aa-d<sub>5</sub>** (5.9 mg, 25% yield) and **1a-d<sub>5</sub>** (11.1 mg, 61% yield). The deuterium incorporation was determined by <sup>1</sup>H NMR.

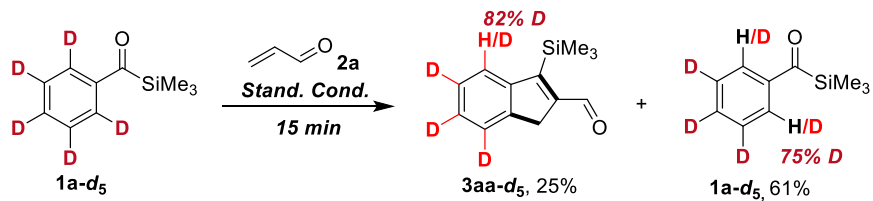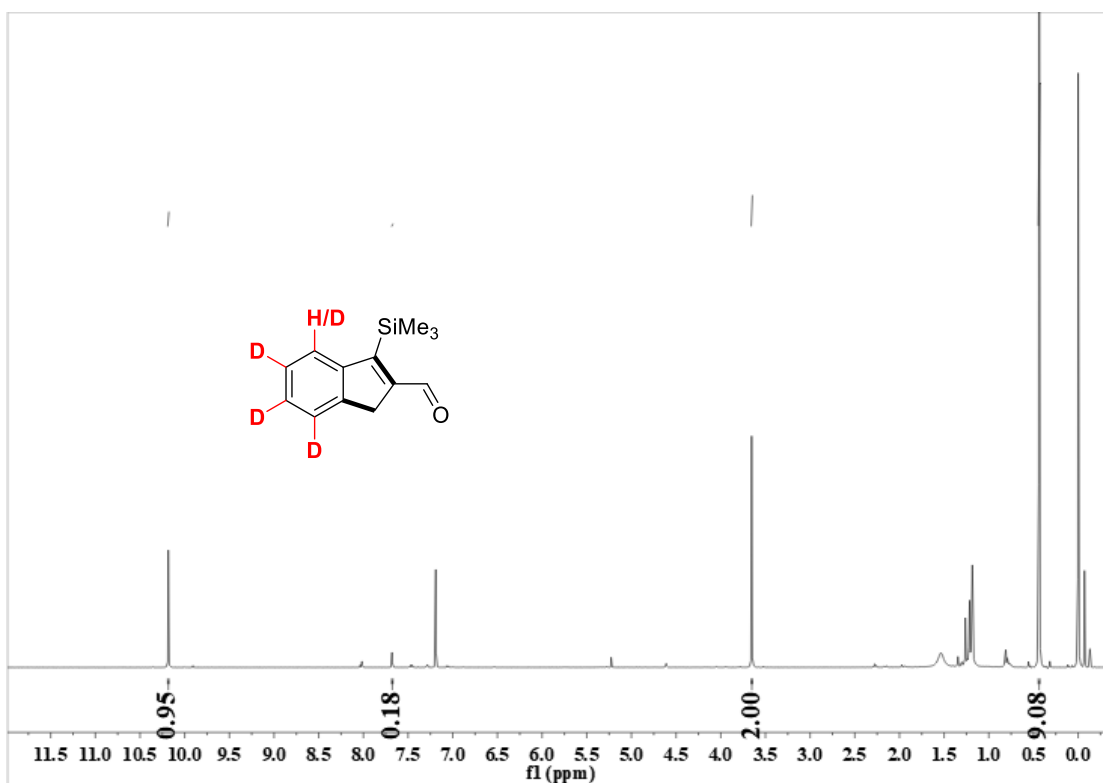



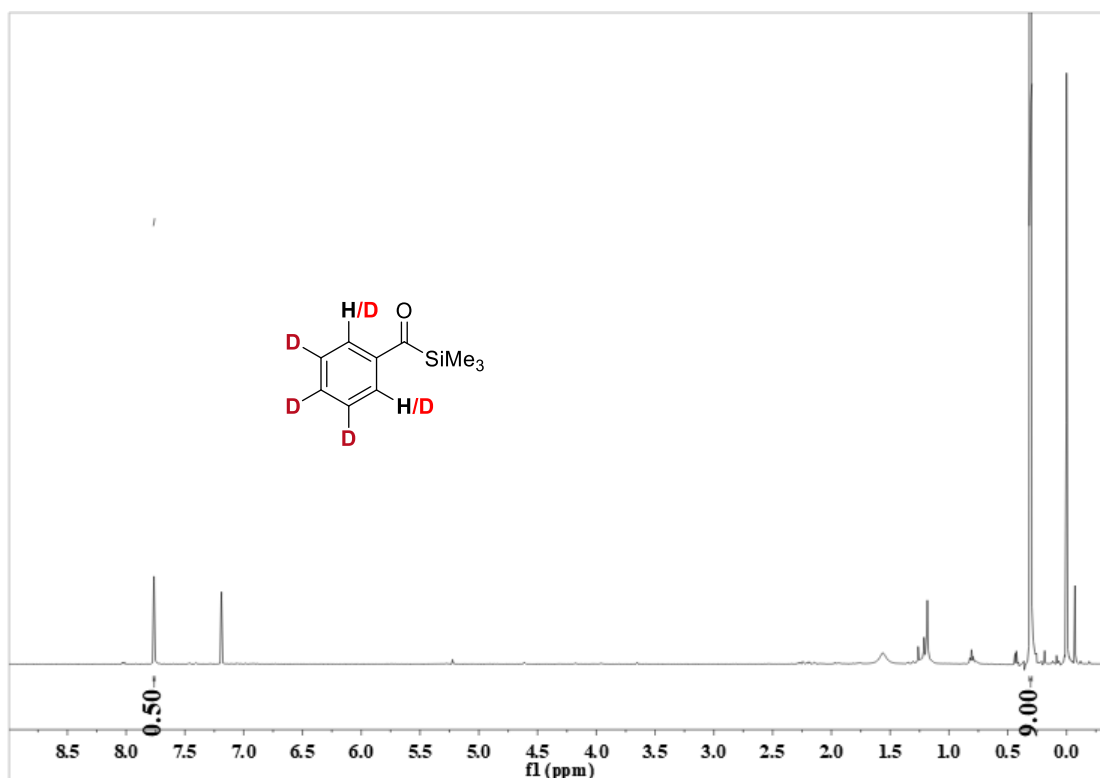

### Intermolecular KIE Experiment

A screw-cap vial was charged with  $[\text{Ru}(p\text{-cymene})\text{Cl}_2]_2$  (5 mol%, 0.01 mmol),  $\text{AgSbF}_6$  (20 mol%, 0.04 mmol),  $\text{Cu}(\text{OAc})_2$  (1.3 equiv, 0.26 mmol) and DCM (1.0 mL). Then, **1a** (1.0 equiv, 0.1 mmol), **1a-d<sub>5</sub>** (1.0 equiv, 0.1 mmol) and **2a** (3.0 equiv, 0.6 mmol) were added into the solution in sequence. The vial was sealed under argon and heated to 60 °C with stirring for 5 min. After cooling down, the mixture was directly applied to a flash column chromatography (EtOAc/petroleum ether mixtures), affording the product as a light yellow solid (7.9 mg, 17% total yield). KIE was determined by  $^1\text{H}$  NMR to be 3.0.

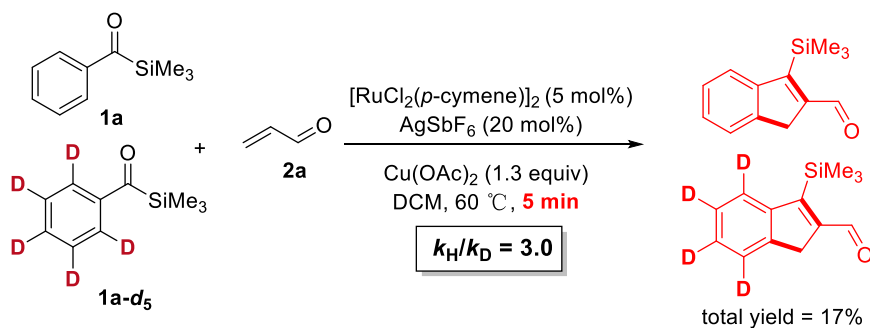

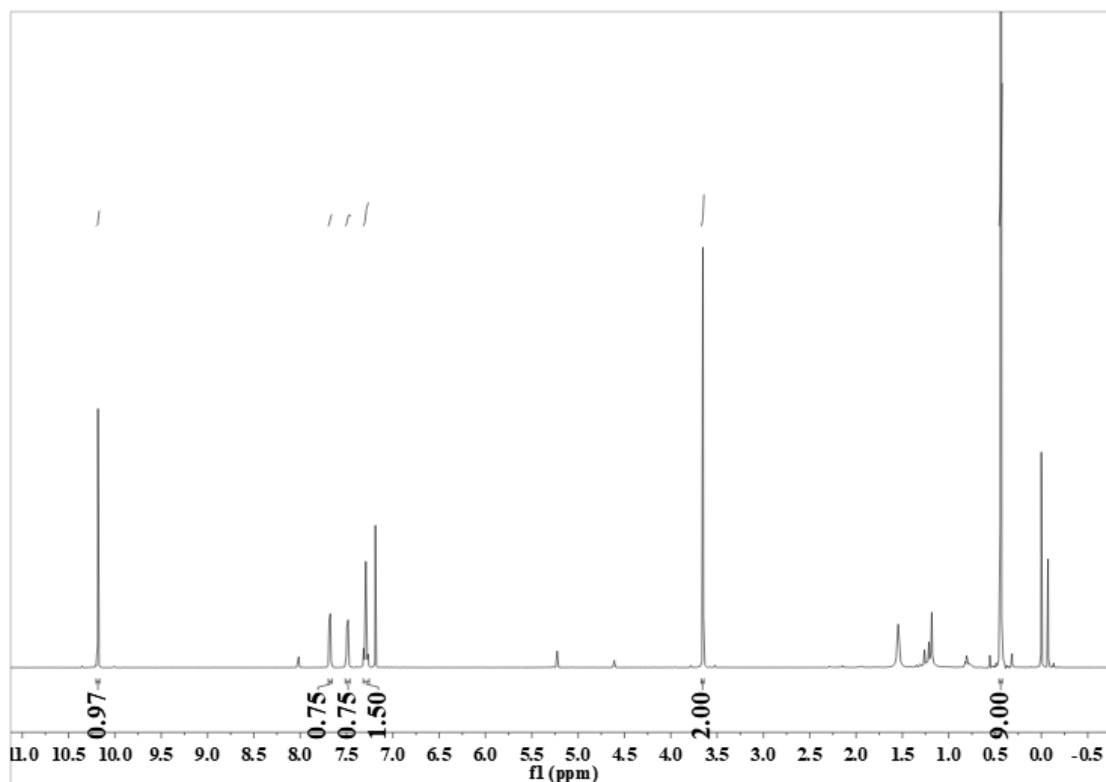

### Intramolecular KIE Experiment

A screw-cap vial was charged with  $[\text{Ru}(p\text{-cymene})\text{Cl}_2]_2$  (5 mol%, 0.01 mmol),  $\text{AgSbF}_6$  (20 mol%, 0.04 mmol),  $\text{Cu}(\text{OAc})_2$  (1.3 equiv, 0.26 mmol) and DCM (1.0 mL). Then, **1a-d<sub>1</sub>** (1.0 equiv, 0.2 mmol) and **2a** (3.0 equiv, 0.6 mmol) were added into the solution in sequence. The vial was sealed under argon and heated to 60 °C with stirring for 16 h. After cooling down, the mixture was directly applied to a flash column chromatography (EtOAc/petroleum ether mixtures), affording the product **3aa-d<sub>1</sub>** as a light yellow solid (30 mg, 64% yield). KIE was determined by  $^1\text{H}$  NMR to be 1.2.

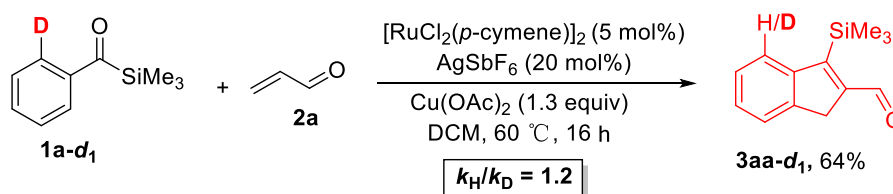

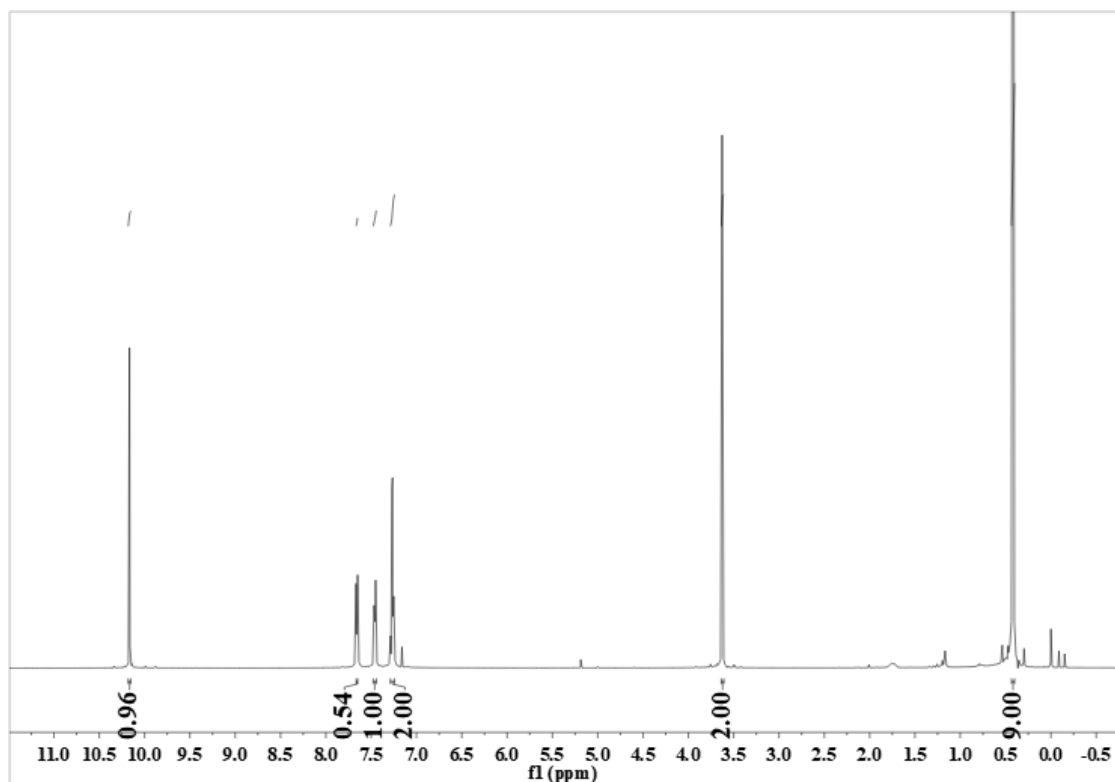

#### Deuterium Labelling Experiment with 2d-d<sub>2</sub>

A screw-cap vial was charged with  $[\text{Ru}(p\text{-cymene})\text{Cl}_2]_2$  (10 mol%, 0.01 mmol),  $\text{AgSbF}_6$  (40 mol%, 0.04 mmol),  $\text{Cu}(\text{OAc})_2$  (1.3 equiv, 0.13 mmol) and DCM (0.5 mL). Then, **1a** (17.8 mg, 0.1 mmol) and **2d-d<sub>2</sub>** (10.0 equiv, 1.0 mmol) were added into the solution in sequence. The vial was sealed under argon and heated to 40 °C with stirring for 16 h. After cooling down, the mixture was directly applied to a flash column chromatography (EtOAc/petroleum ether mixtures), affording **4ad-d<sub>2</sub>** as a light yellow oil (14.5 mg, 42% yield).

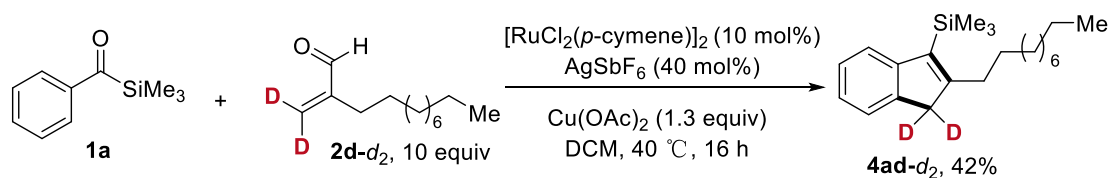

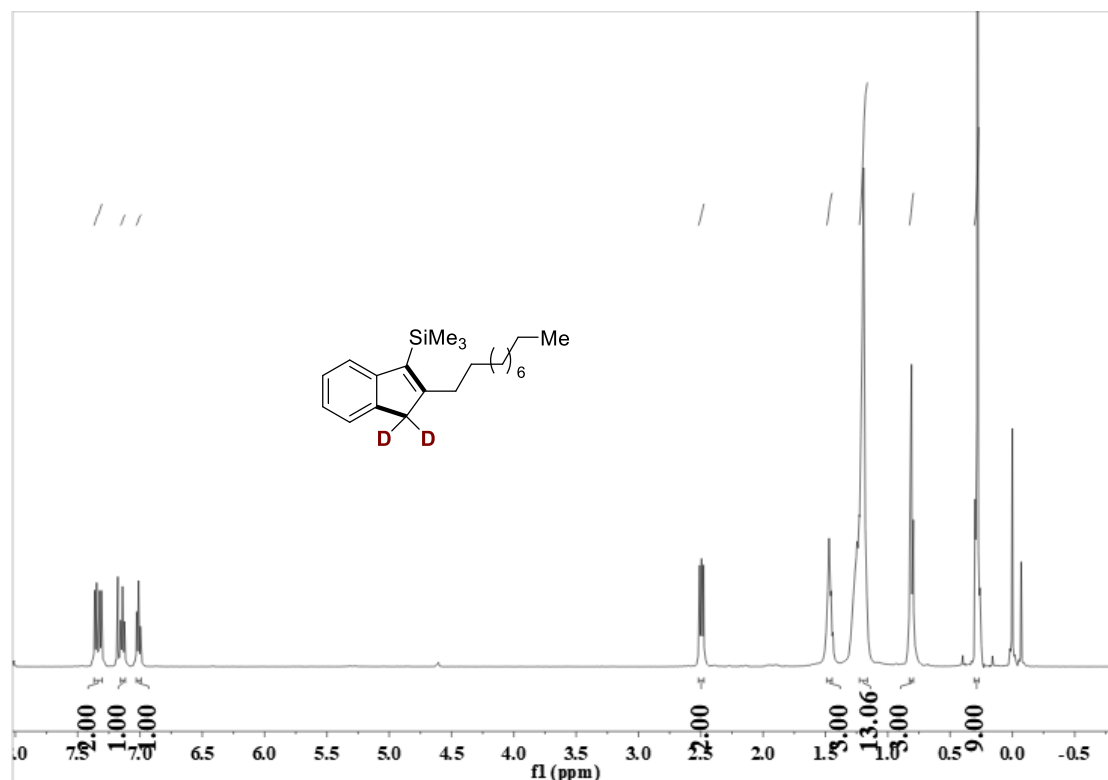

### Deuterium Labelling Experiment with 2d-d

A screw-cap vial was charged with  $[\text{Ru}(p\text{-cymene})\text{Cl}_2]_2$  (10 mol%, 0.01 mmol),  $\text{AgSbF}_6$  (40 mol%, 0.04 mmol),  $\text{Cu}(\text{OAc})_2$  (1.3 equiv, 0.13 mmol) and DCM (0.5 mL). Then, **1a** (17.8 mg, 0.1 mmol) and **2d-d** (10.0 equiv, 1.0 mmol) were added into the solution in sequence. The vial was sealed under argon and heated to 40 °C with stirring for 16 h. After cooling down, the mixture was directly applied to a flash column chromatography (EtOAc/petroleum ether mixtures), affording **4ad** as a yellow liquid (13.4 mg, 39% yield).

### Synthesis of 8

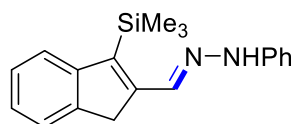

A screw-cap vial was charged with NaOAc (1.0 equiv, 0.1 mmol), AcOH (0.2 mL), KF (0.1 equiv, 0.01 mmol). Then **3aa** (23.2 mg, 0.1 mmol) and  $\text{PhNHNH}_2$  (1.1 equiv, 0.11 mmol) were added in sequence. The vial was sealed under argon and stirring in room temperature for 1 h. The mixture was quenched with saturated aqueous  $\text{NaHCO}_3$  to pH 8. After the mixture was allowed to warm to ambient temperature, then taken up in EtOAc and washed three times with brine. The combined organic layers were dried over  $\text{Na}_2\text{SO}_4$ , then concentrated in

vacuo. The arylsilanes products were purified by flash chromatography (EtOAc/petroleum ether mixtures). Compound **8** was obtained as a brown liquid (31.9 mg, yield = 99%). <sup>1</sup>H NMR (500 MHz, CDCl<sub>3</sub>): δ = 7.98 (s, 1H), 7.64 (s, 1H), 7.57 (d, *J* = 7.5 Hz, 1H), 7.50 (d, *J* = 7.0 Hz, 1H), 7.34-7.28 (m, 3H), 7.23-7.20 (td, *J* = 7.5 Hz, *J* = 1.0 Hz, 1H), 7.14-7.12 (m, 2H), 6.94-6.91 (m, 1H), 3.94 (s, 2H), 0.49 (s, 9H). <sup>13</sup>C NMR (125 Hz, CDCl<sub>3</sub>): δ = 152.15, 148.24, 143.47, 142.43, 141.17, 134.83, 125.22, 123.97, 122.65, 121.50, 119.25, 111.86, 39.40, 0.21. HRMS (ESI): *m/z* for C<sub>19</sub>H<sub>22</sub>N<sub>2</sub>Si [M+Na]<sup>+</sup>: 329.1444, found: 329.1444. FTIR (KBr, cm<sup>-1</sup>): 3451.80, 3416.80, 2954.62, 2922.40, 1642.85, 1602.16, 1503.41, 1401.52, 1251.64.

### Synthesis of 9

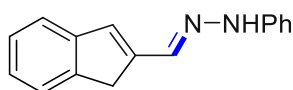

A screw-cap vial was charged with NaOAc (1.0 equiv, 0.1 mmol), AcOH (0.2 mL), KF (0.1 equiv, 0.01 mmol). Then **3aa** (23.2 mg, 0.1 mmol) and PhNHNH<sub>2</sub> (1.1 equiv, 0.11 mmol) were added in sequence. The vial was sealed under argon and stirring in room temperature for 1 h, then heated to 60 °C with stirring overnight. After the mixture was allowed to warm to ambient temperature, the mixture was quenched with saturated aqueous NaHCO<sub>3</sub> to pH 8, then taken up in EtOAc and washed three times with brine. The combined organic layers were dried over Na<sub>2</sub>SO<sub>4</sub>, then concentrated in vacuo. The arylsilanes products were purified by flash chromatography (EtOAc/petroleum ether mixtures). Compound **9** was obtained as a brown liquid (21.3 mg, yield = 91%). <sup>1</sup>H NMR (500 MHz, CDCl<sub>3</sub>): δ = 7.75 (s, 1H), 7.58 (s, 1H), 7.49 (d, *J* = 7.0 Hz, 1H), 7.39 (d, *J* = 7.5 Hz, 1H), 7.33-7.28 (m, 3H), 7.23 (t, *J* = 7.0 Hz, 1H), 7.12 (d, *J* = 8.5 Hz, 2H), 6.93-6.89 (m, 2H), 3.83 (s, 2H). <sup>13</sup>C NMR (125 Hz, CDCl<sub>3</sub>): δ = 144.66, 144.55, 144.50, 143.30, 135.21, 131.56, 129.36, 126.60, 125.42, 123.91, 121.17, 120.17, 112.76. HRMS (ESI): *m/z* for C<sub>17</sub>H<sub>16</sub>N<sub>2</sub> [M+H]<sup>+</sup>: 249.1386, found: 249.1386. FTIR (KBr, cm<sup>-1</sup>): 3454.68, 3422.99, 3093.24, 2921.38, 2850.15, 1651.17, 1633.00, 1402.54, 987.09.

### Synthesis of 10

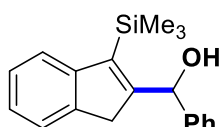

PhMgBr (1 M in THF, 0.12 mmol) was dissolved in THF (0.25 mL) and

**3aa** (23.2 mg, 0.1 mmol) was dissolved in THF (0.25 mL) were added at 0 °C. After warming up to rt the mixture was stirred for 3 h. The mixture was quenched with saturated aqueous NH<sub>4</sub>Cl. After the mixture was allowed to warm to ambient temperature, then taken up in EtOAc and washed three times with brine. The combined organic layers were dried over Na<sub>2</sub>SO<sub>4</sub>, concentrated in vacuo, and purified by flash chromatography (EtOAc/petroleum ether mixtures). Compound **10** was obtained as a yellow liquid (25.8 mg, yield = 83%). <sup>1</sup>H NMR (500 MHz, CDCl<sub>3</sub>): δ = 7.53 (d, *J* = 8.0 Hz, 1H), 7.40 (d, *J* = 7.0 Hz, 2H), 7.36-7.30 (m, 3H), 7.26-7.22 (m, 2H), 7.14-7.11 (m, 1H), 6.10 (s, 1H), 3.60 (d, *J* = 23.5 Hz, 1H), 3.10 (d, *J* = 23.5 Hz, 1H), 0.45 (s, 9H). <sup>13</sup>C NMR (125 Hz, CDCl<sub>3</sub>): δ = 158.80, 147.67, 143.03, 142.31, 139.10, 127.64, 126.46, 125.30, 124.85, 123.73, 122.96, 121.88, 70.55, 38.05, 0.23. HRMS (ESI): *m/z* for C<sub>19</sub>H<sub>22</sub>O<sub>2</sub>Si [M+H]<sup>+</sup>: 295.1513, found: 311.1460. FTIR (KBr, cm<sup>-1</sup>): 3451.61, 3421.72, 2966.31, 2359.56, 2333.63, 1658.81, 1632.69, 1402.41.

### Synthesis of 11

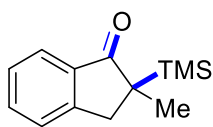

Compound **4ab** (21.8 mg, 0.1 mmol) was dissolved in CH<sub>2</sub>Cl<sub>2</sub> (0.5 mL) and *m*-CPBA (0.11 mmol) were added at 0 °C. After warming up to rt the mixture was stirred for 12 h. The mixture was allowed to warm to ambient temperature, then taken up in CH<sub>2</sub>Cl<sub>2</sub> and washed three times with brine. The combined organic layers were dried over Na<sub>2</sub>SO<sub>4</sub>, then concentrated in vacuo. The arylsilanes products were purified by flash chromatography (EtOAc/petroleum ether mixtures). Compound **11** was obtained as a colorless liquid (19.4 mg, yield = 83%). <sup>1</sup>H NMR (500 MHz, CDCl<sub>3</sub>): δ = 7.72 (d, *J* = 7.5 Hz, 1H), 7.56-7.53 (td, *J* = 7.5 Hz, *J* = 1.0 Hz, 1H), 7.42 (d, *J* = 7.5 Hz, 1H), 7.35 (t, *J* = 8.0 Hz, 1H), 3.29 (d, *J* = 18.0 Hz, 1H), 2.86 (d, *J* = 17.5 Hz, 1H), 1.39 (s, 3H), - 0.05 (s, 9H). <sup>13</sup>C NMR (125 Hz, CDCl<sub>3</sub>): δ = 214.80, 156.70, 142.45, 138.25, 131.69, 130.15, 127.81, 48.75, 42.92, 22.77, 0.21. HRMS (ESI): *m/z* for C<sub>13</sub>H<sub>18</sub>O<sub>2</sub>Si [M+H]<sup>+</sup>: 219.1200, found: 219.1205. FTIR (KBr, cm<sup>-1</sup>): 3447.89, 3423.57, 2945.62, 2796.97, 1734.19, 1657.89, 897.63.

# NMR Spectra

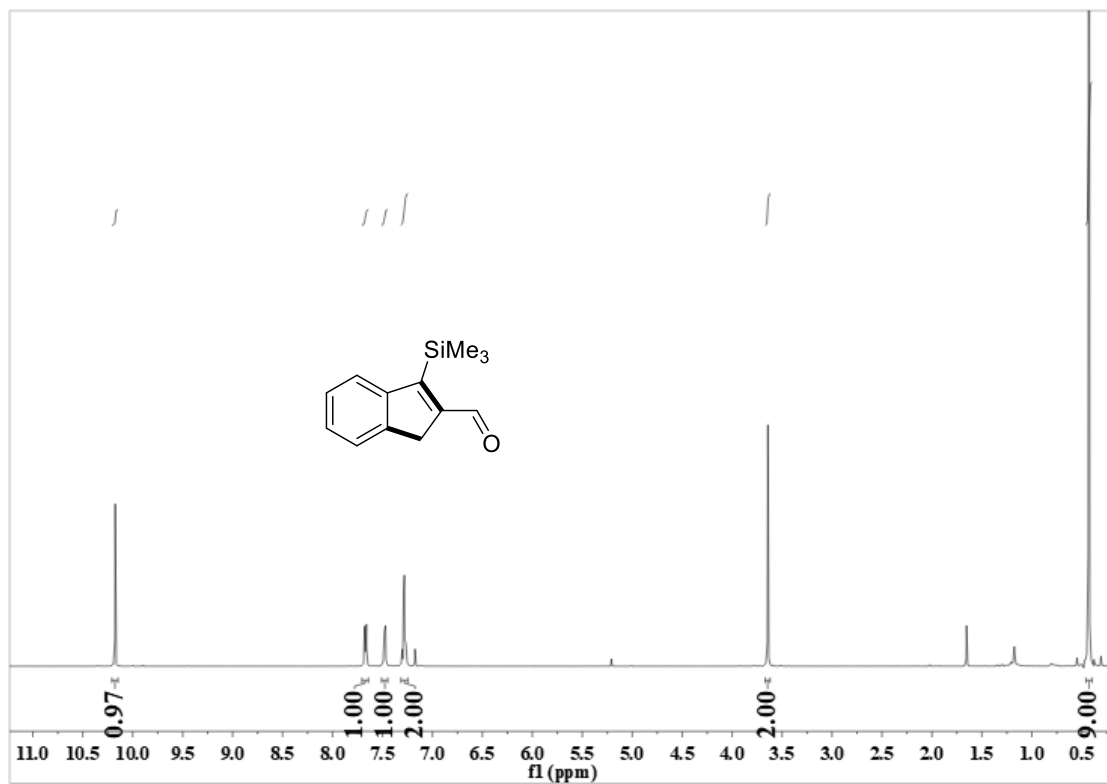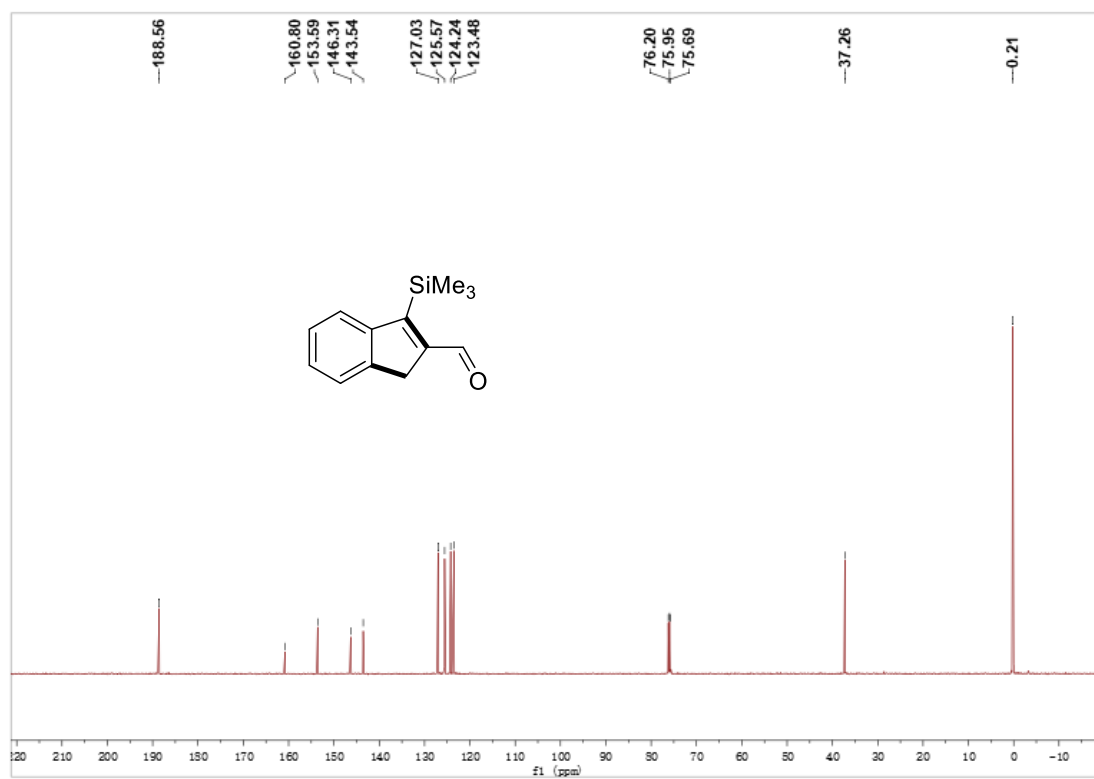

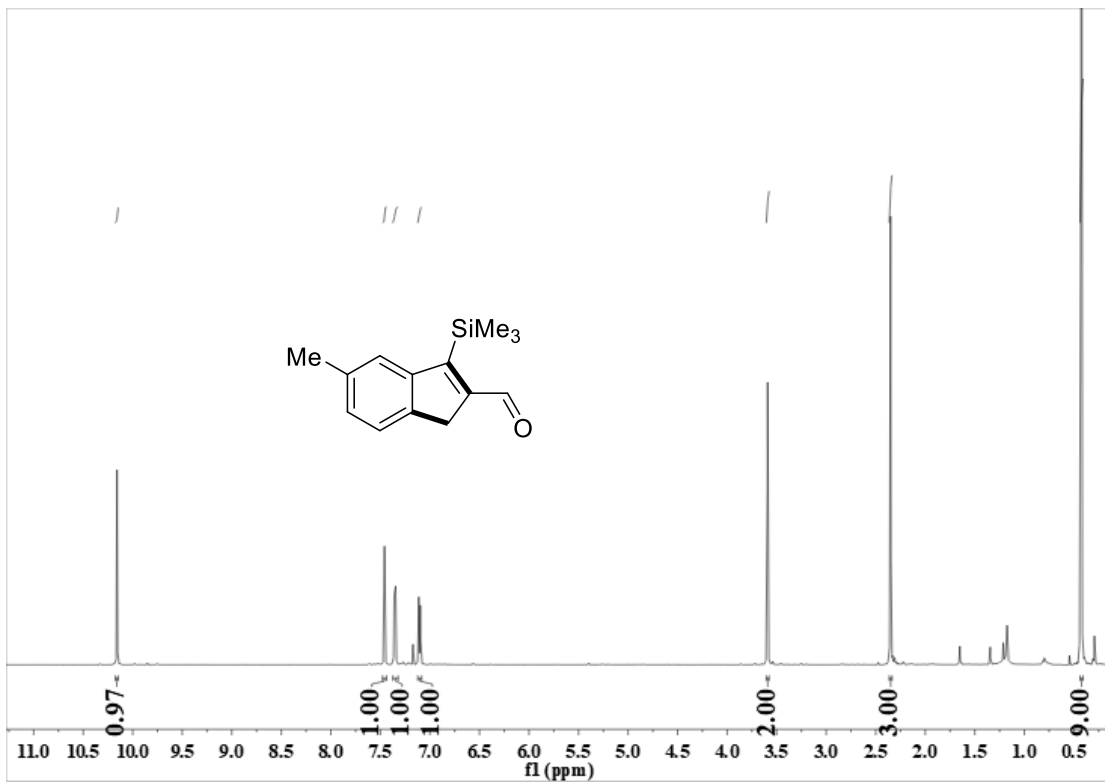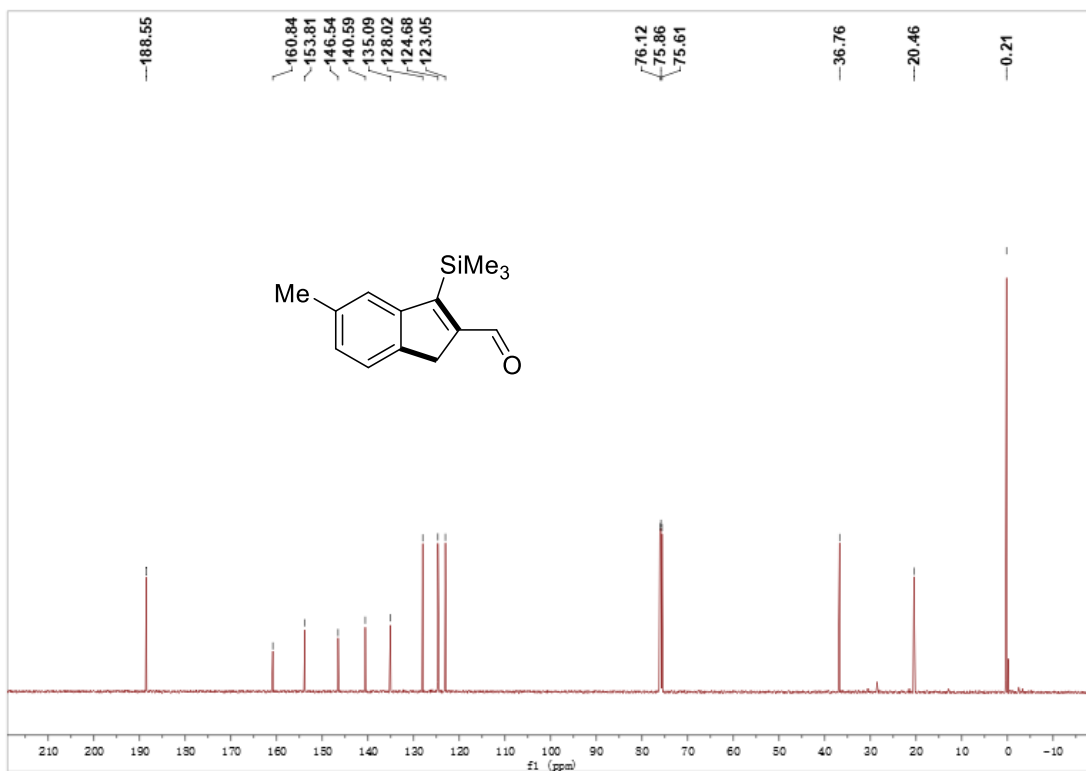



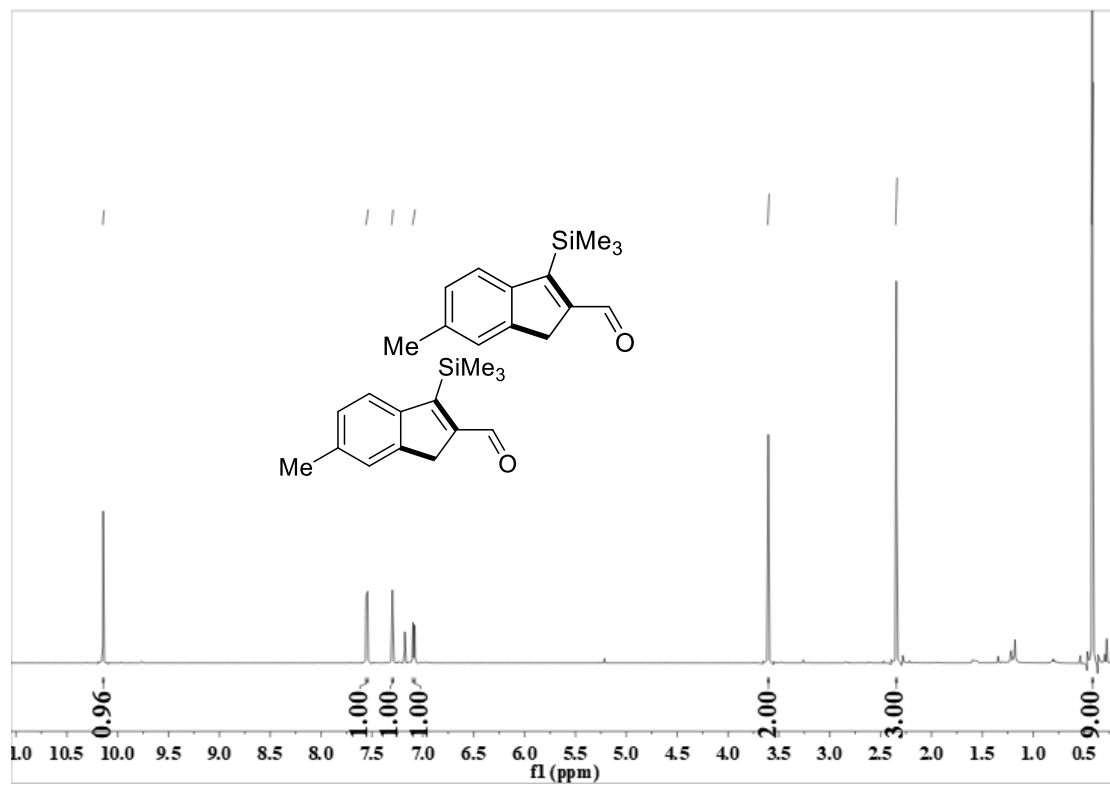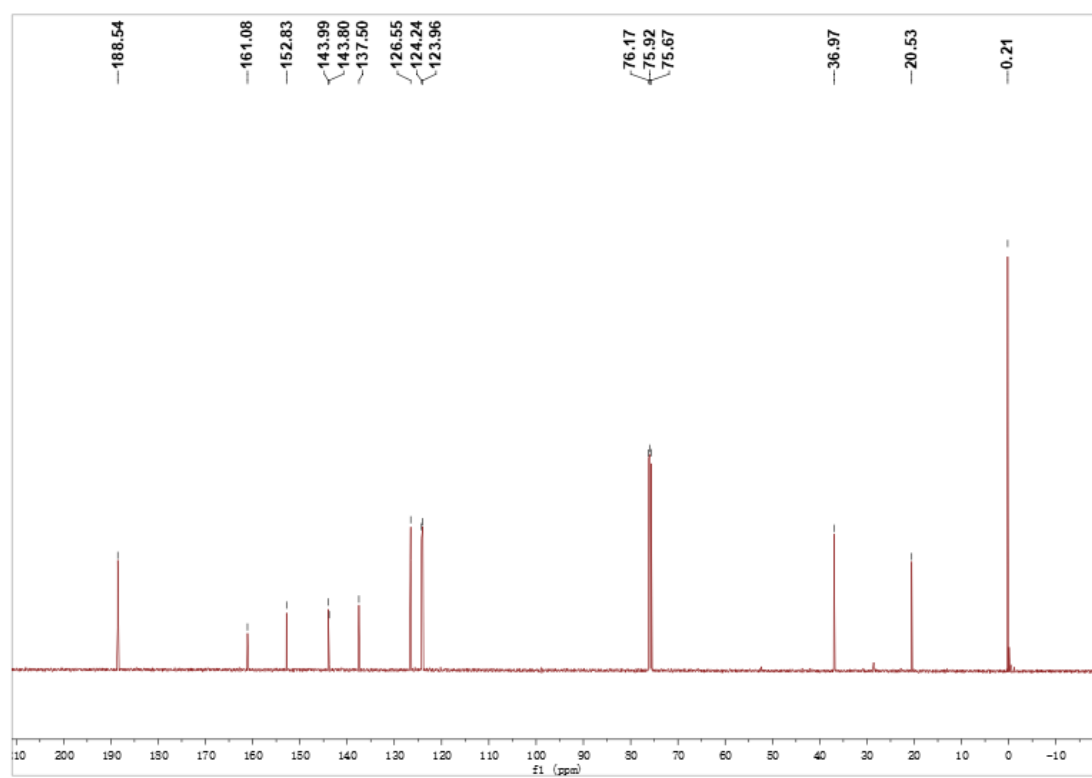

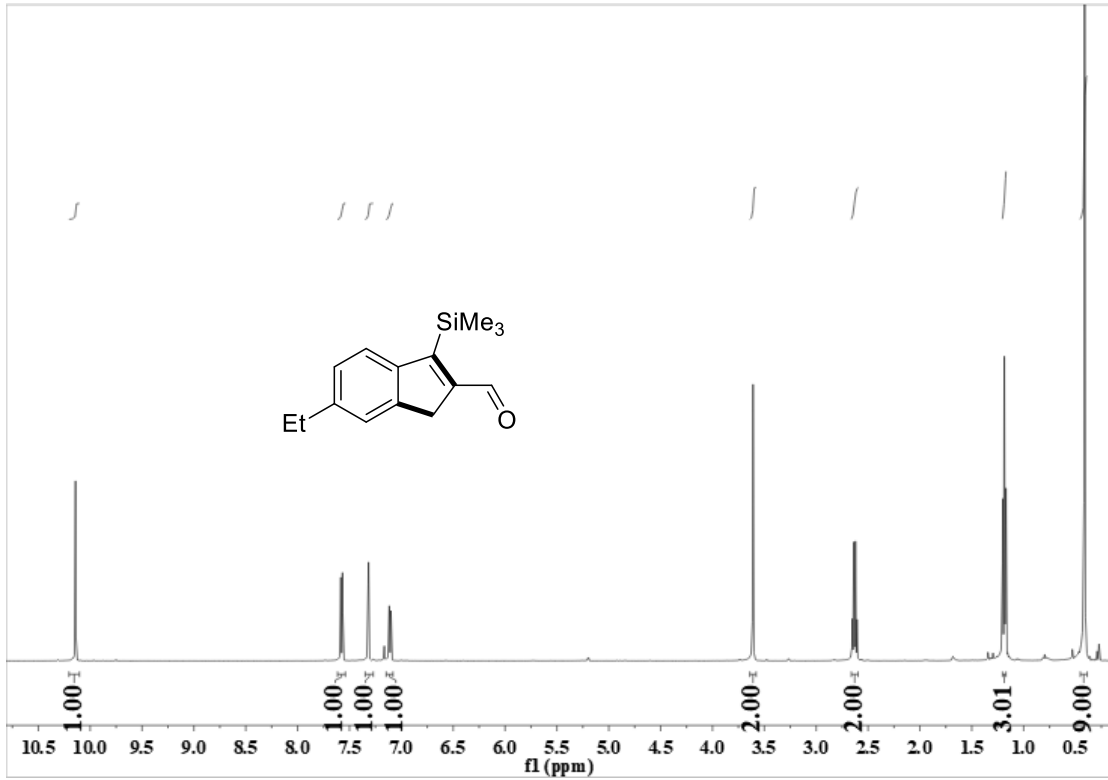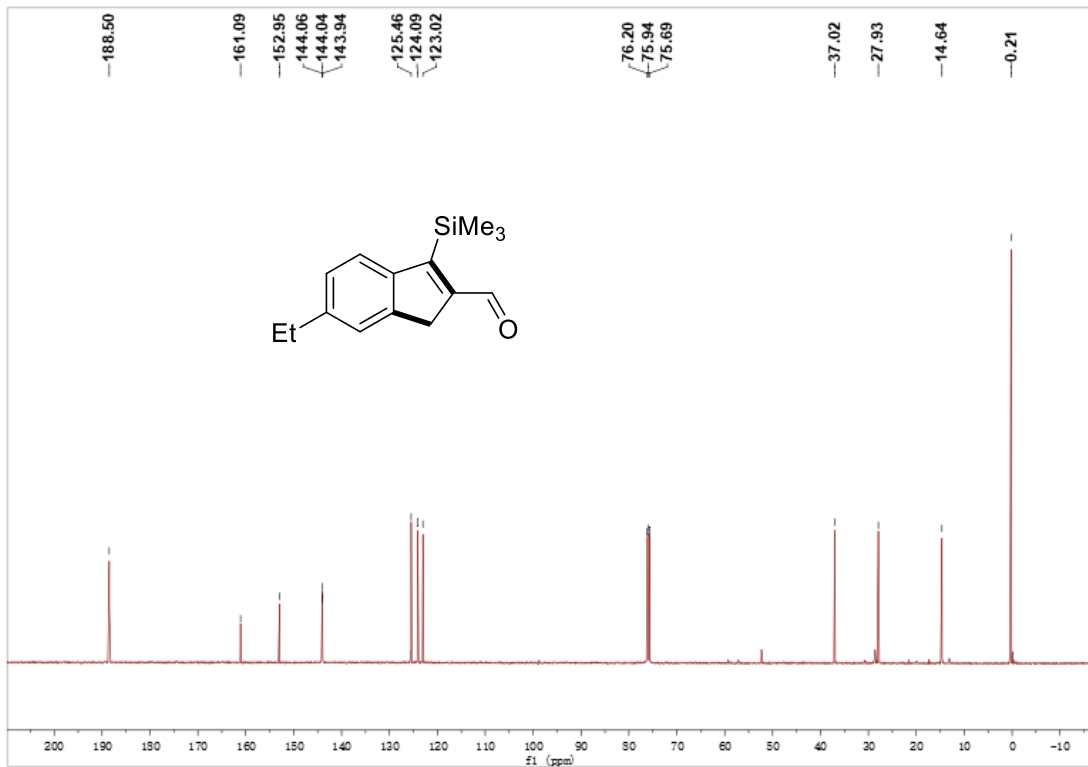

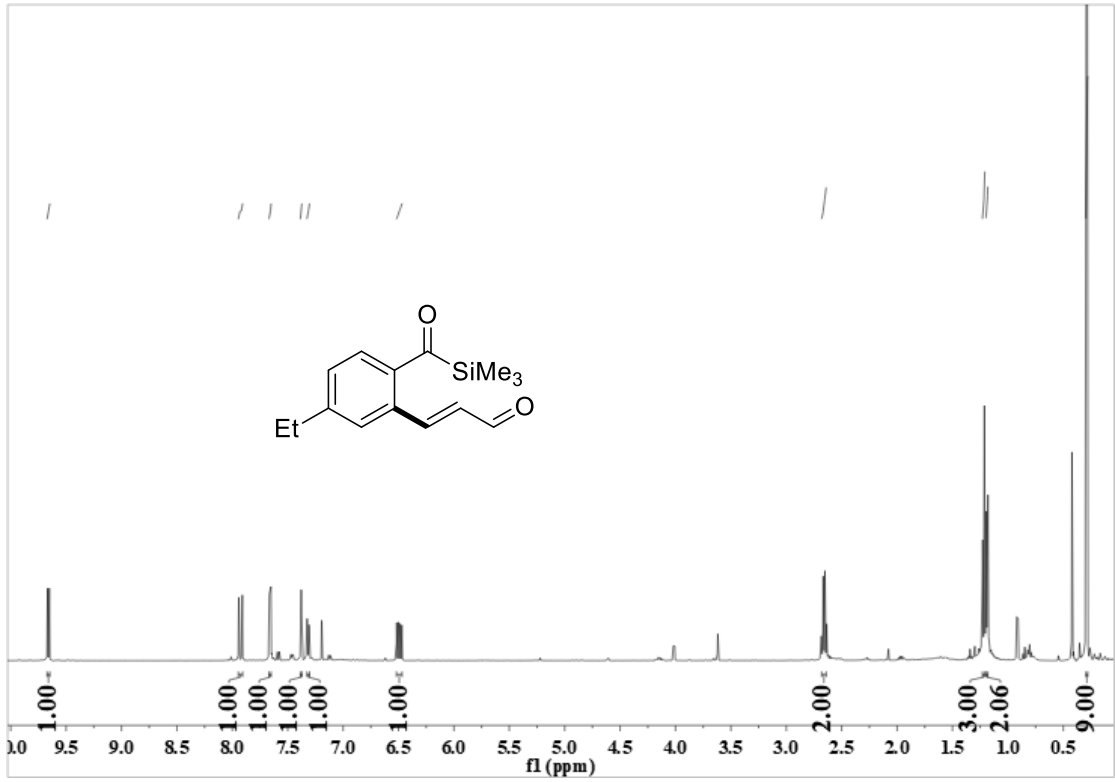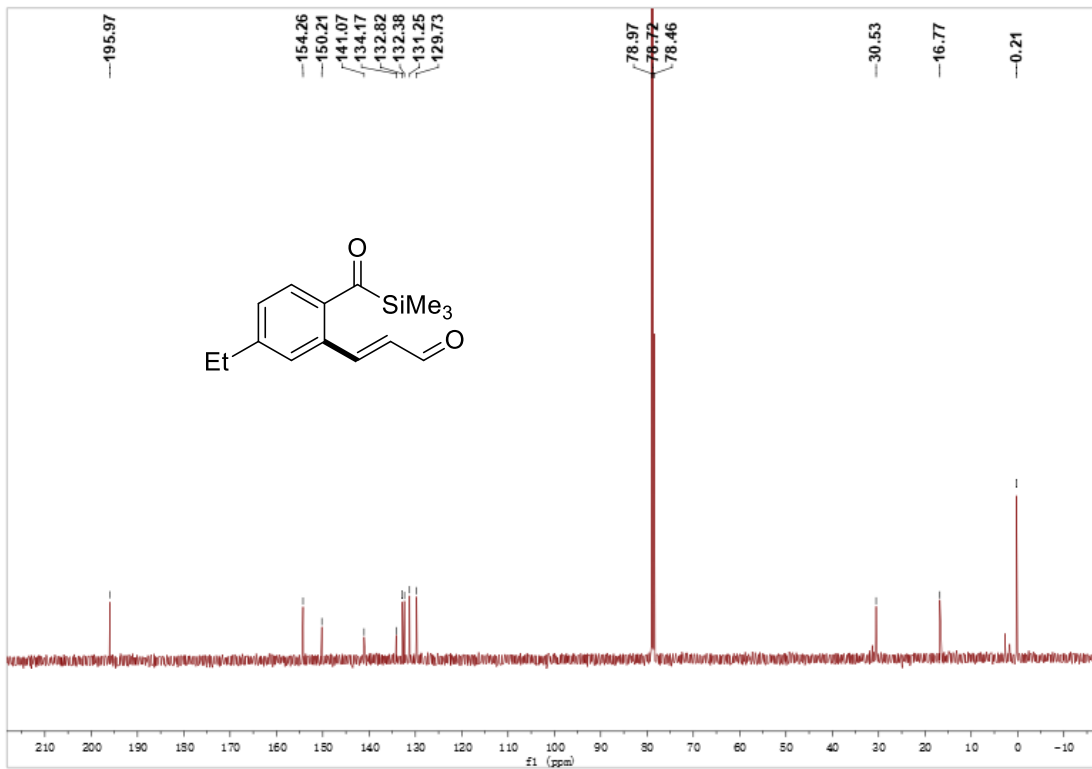

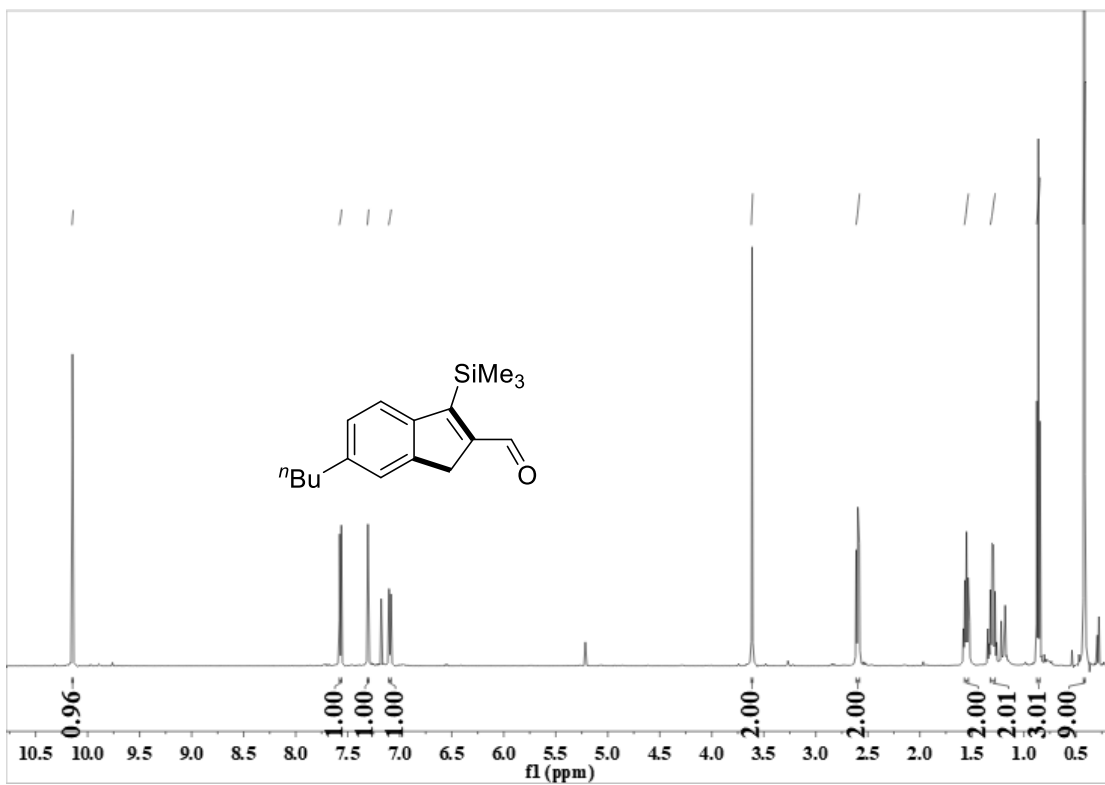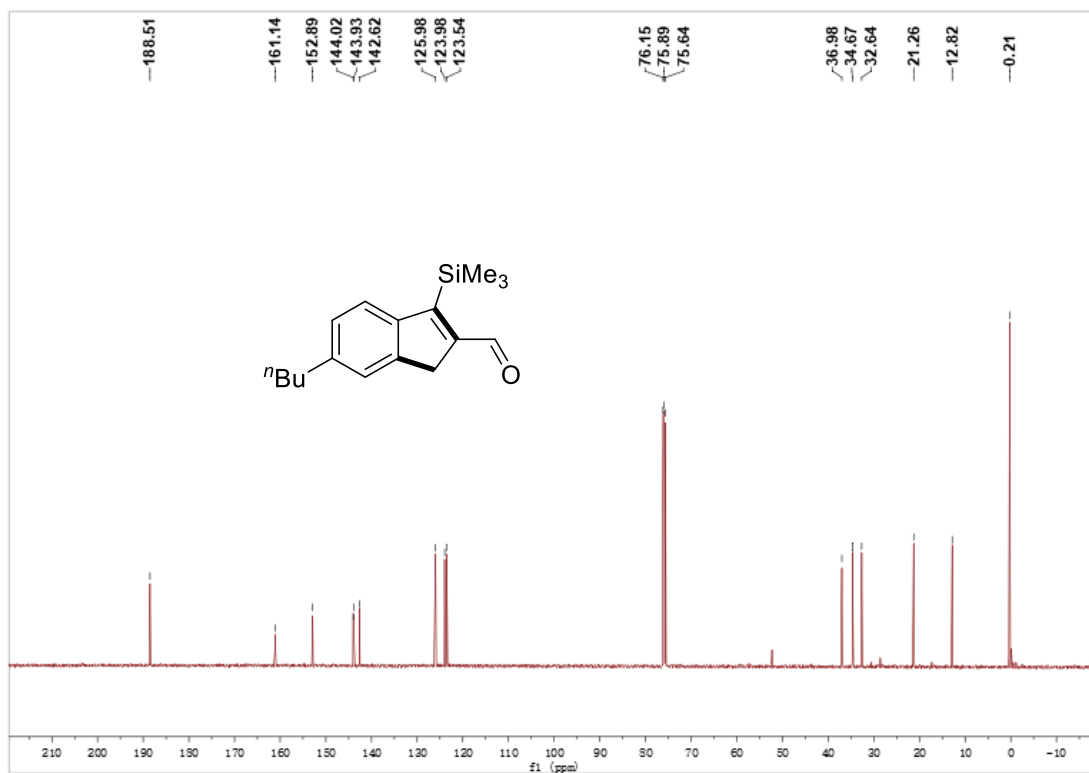

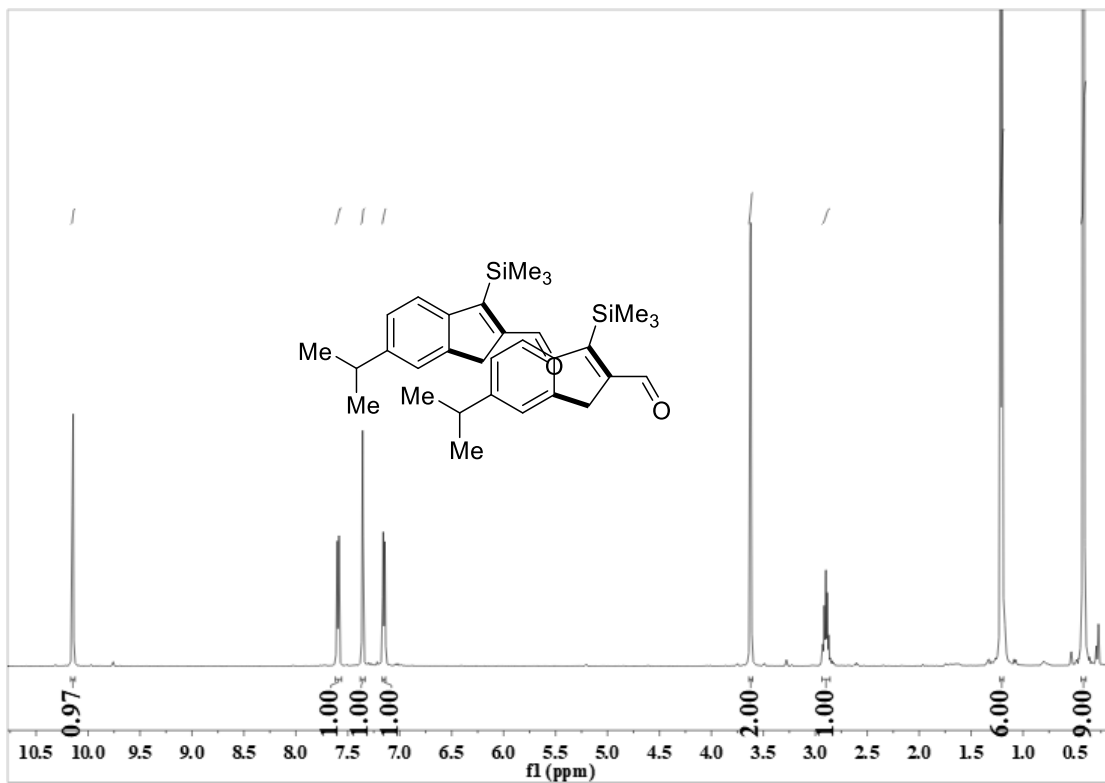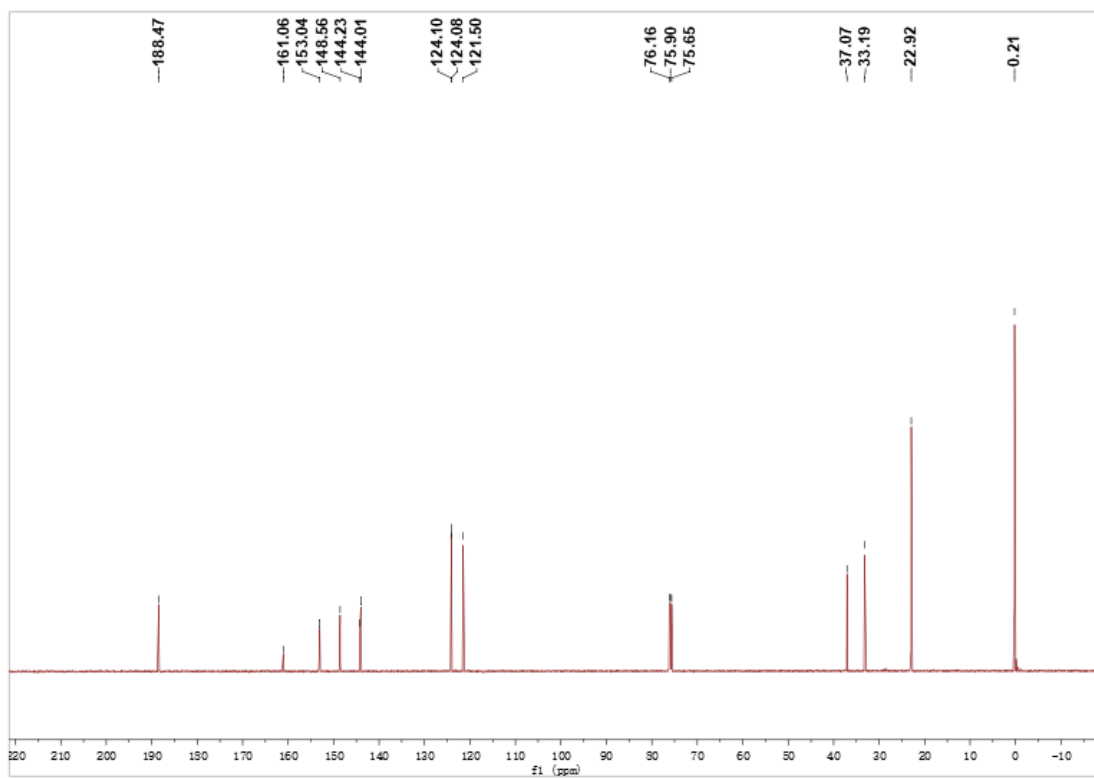

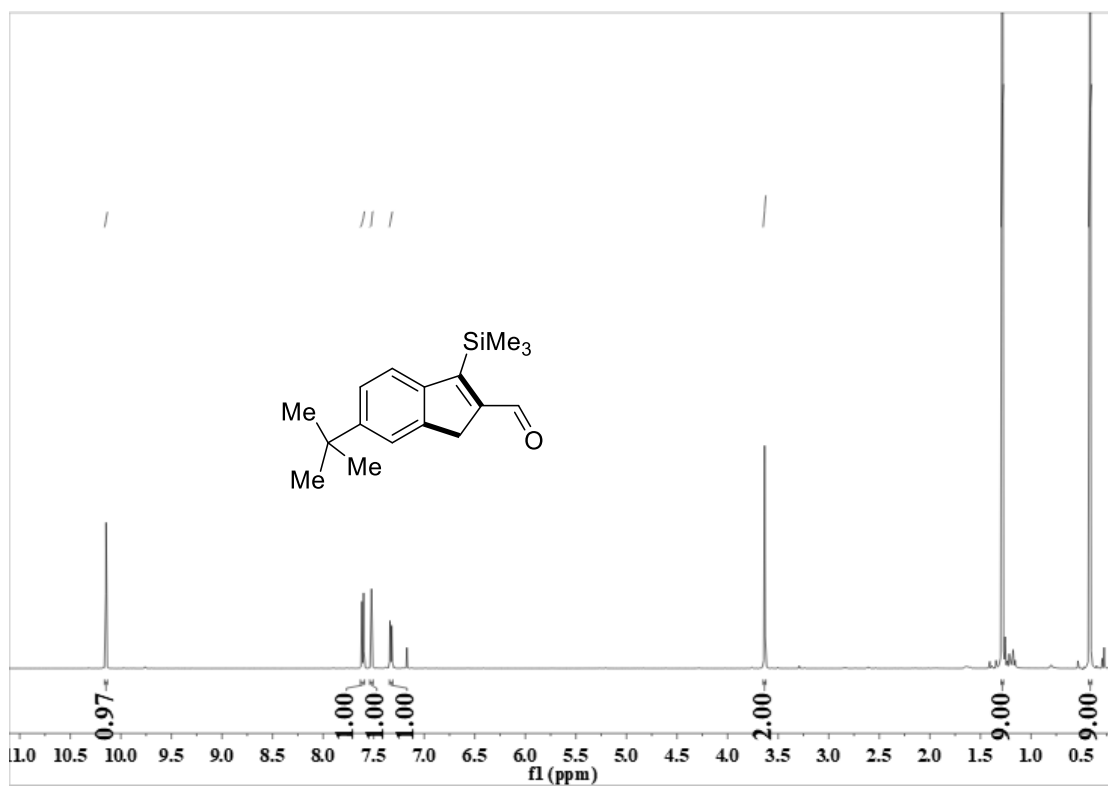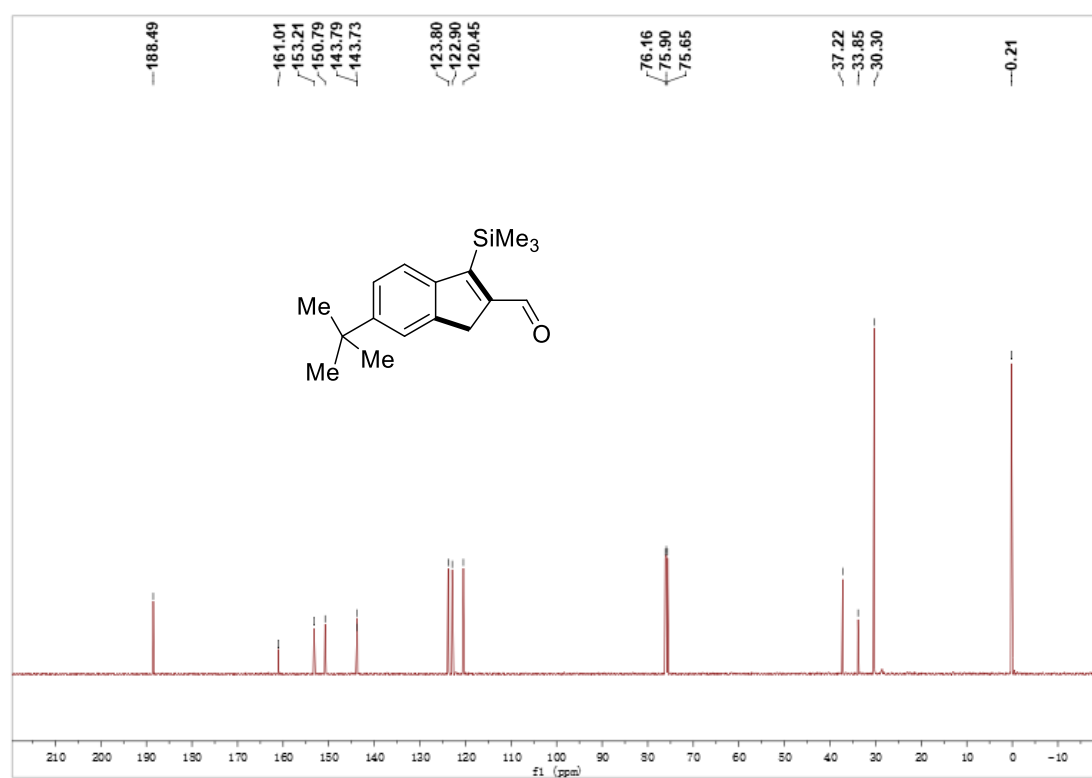

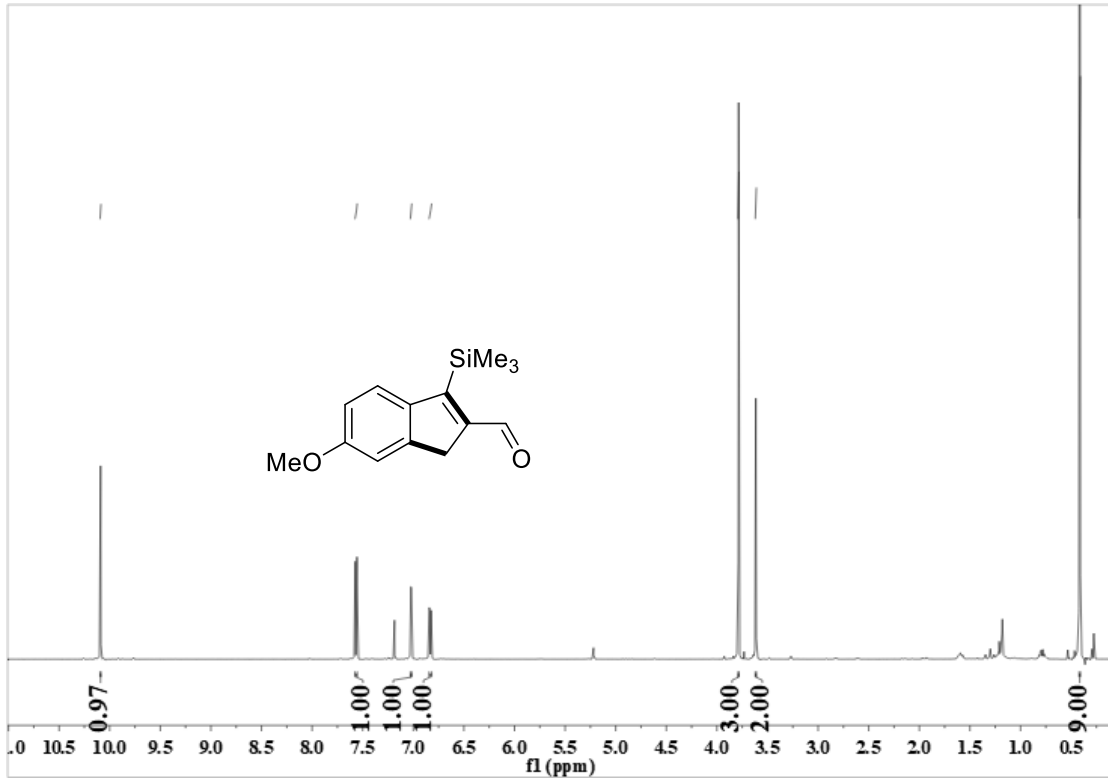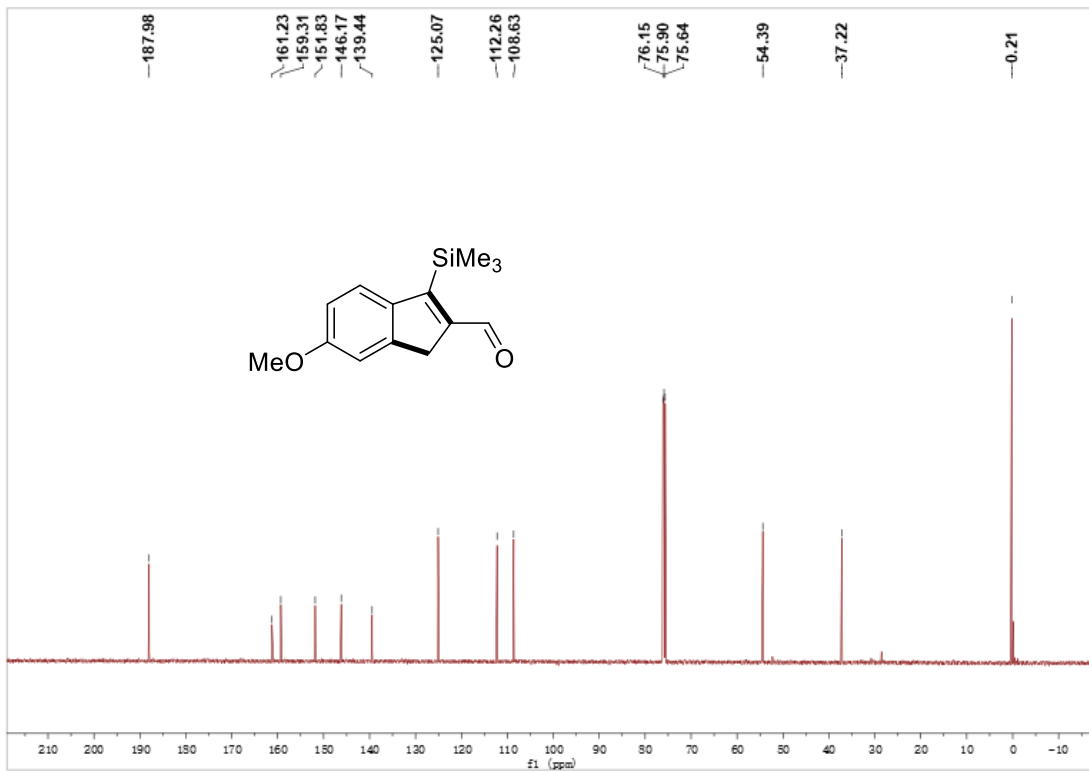

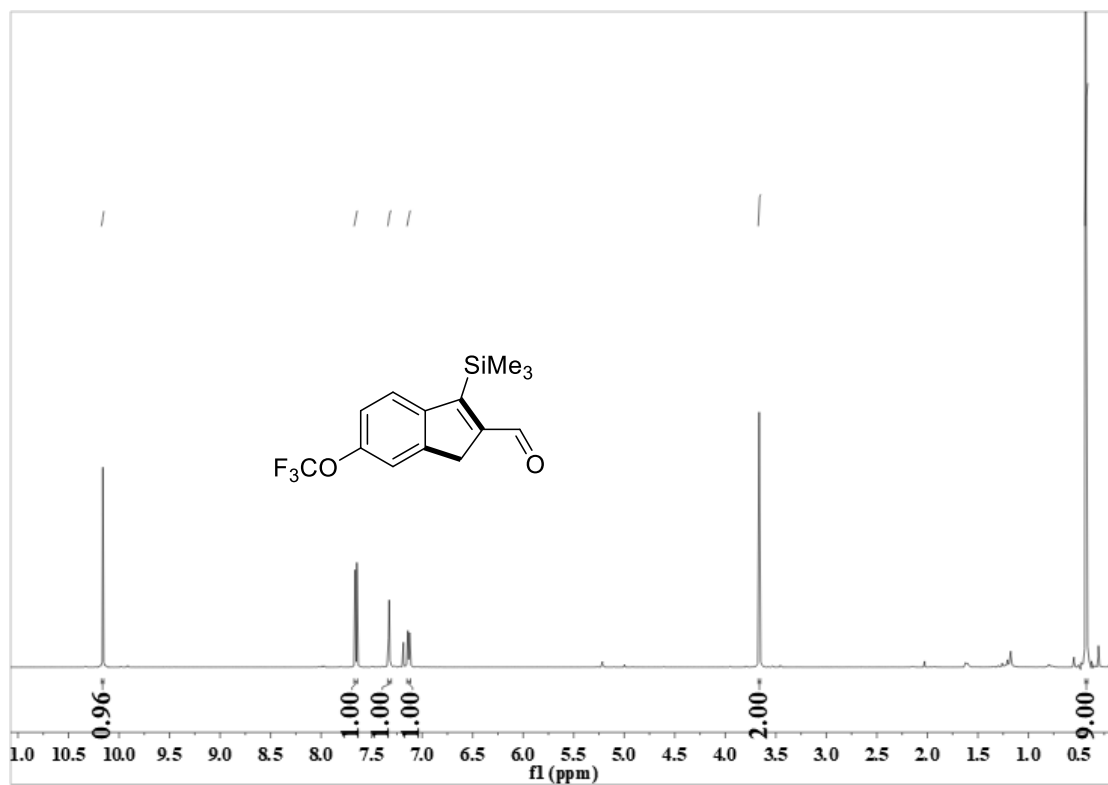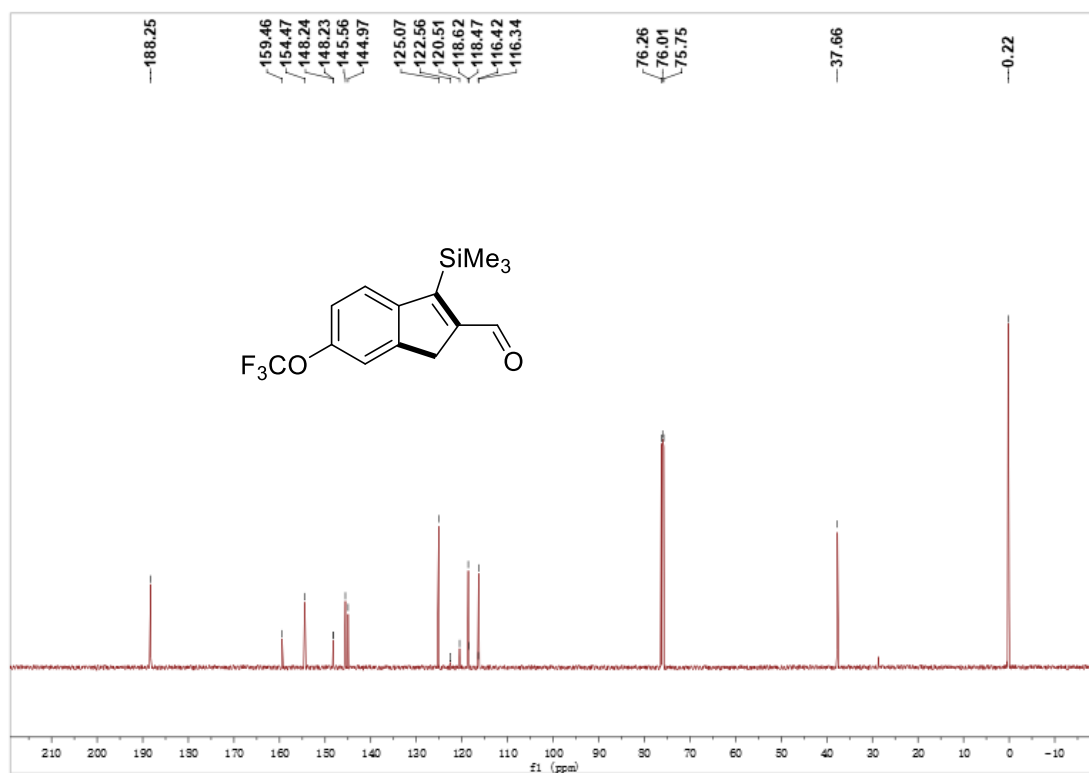



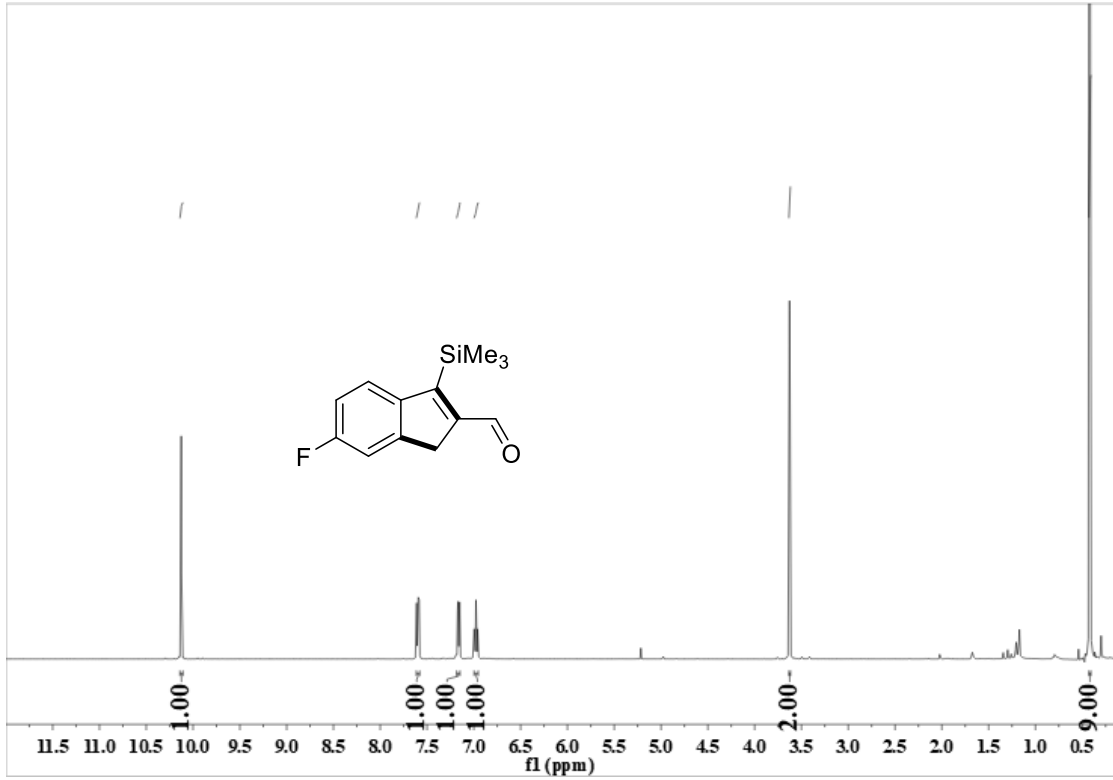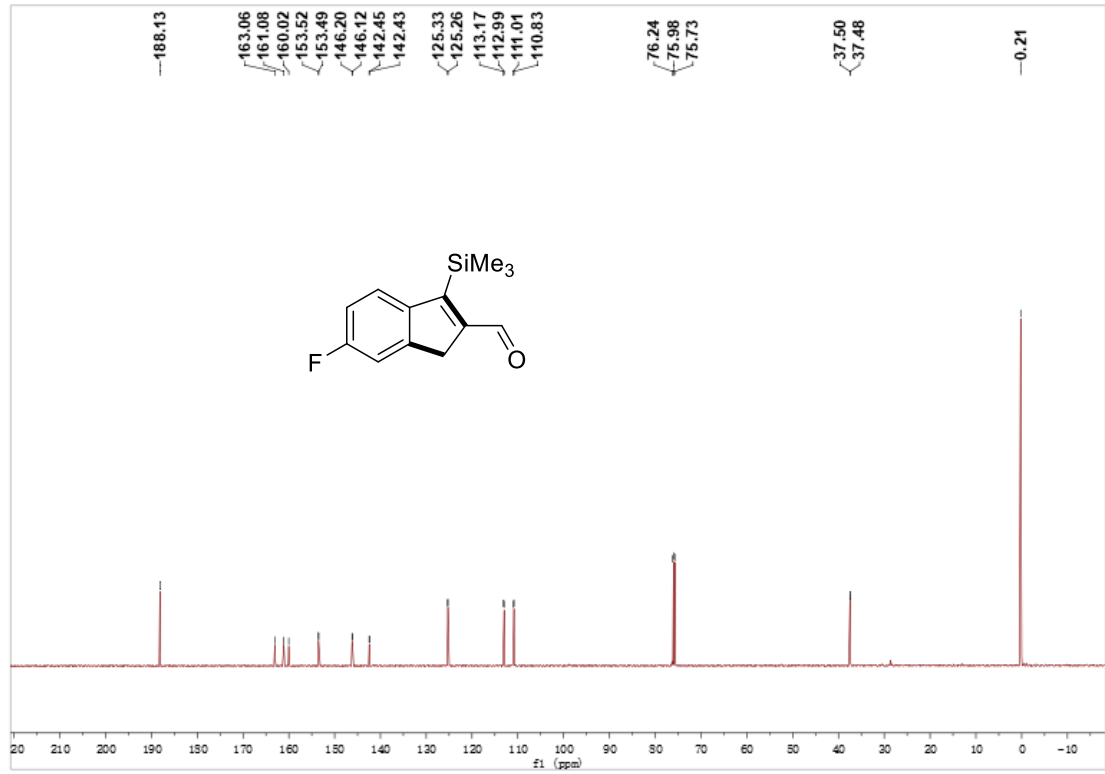

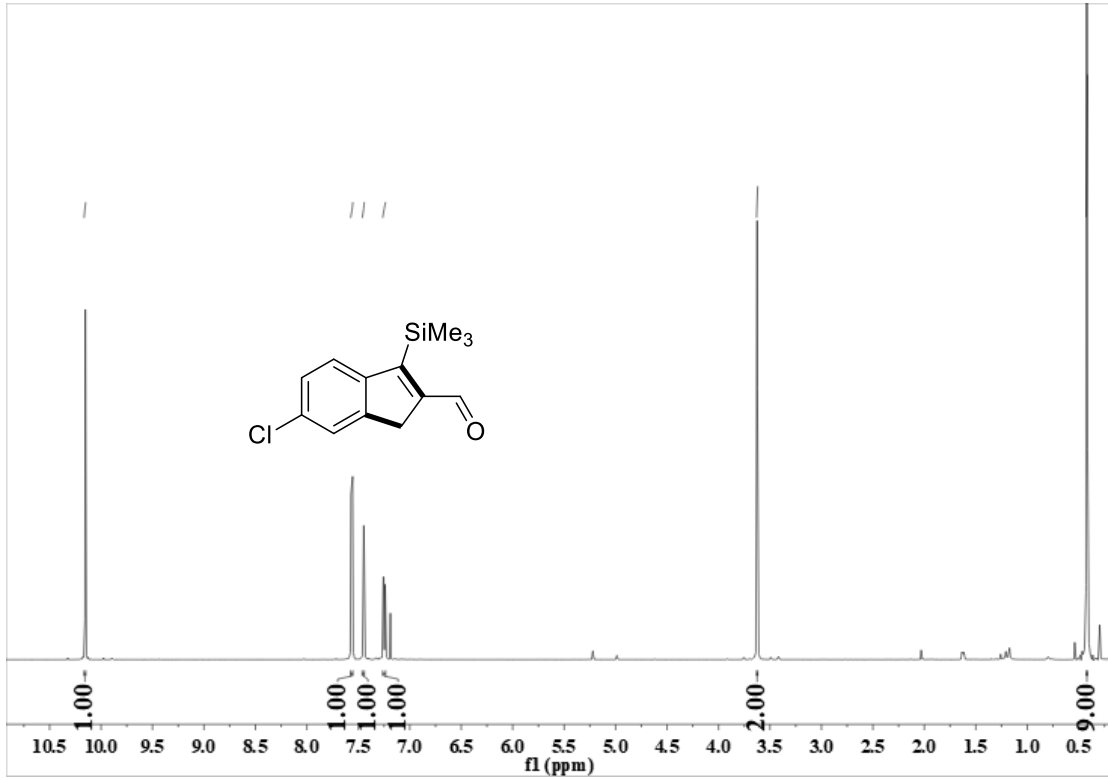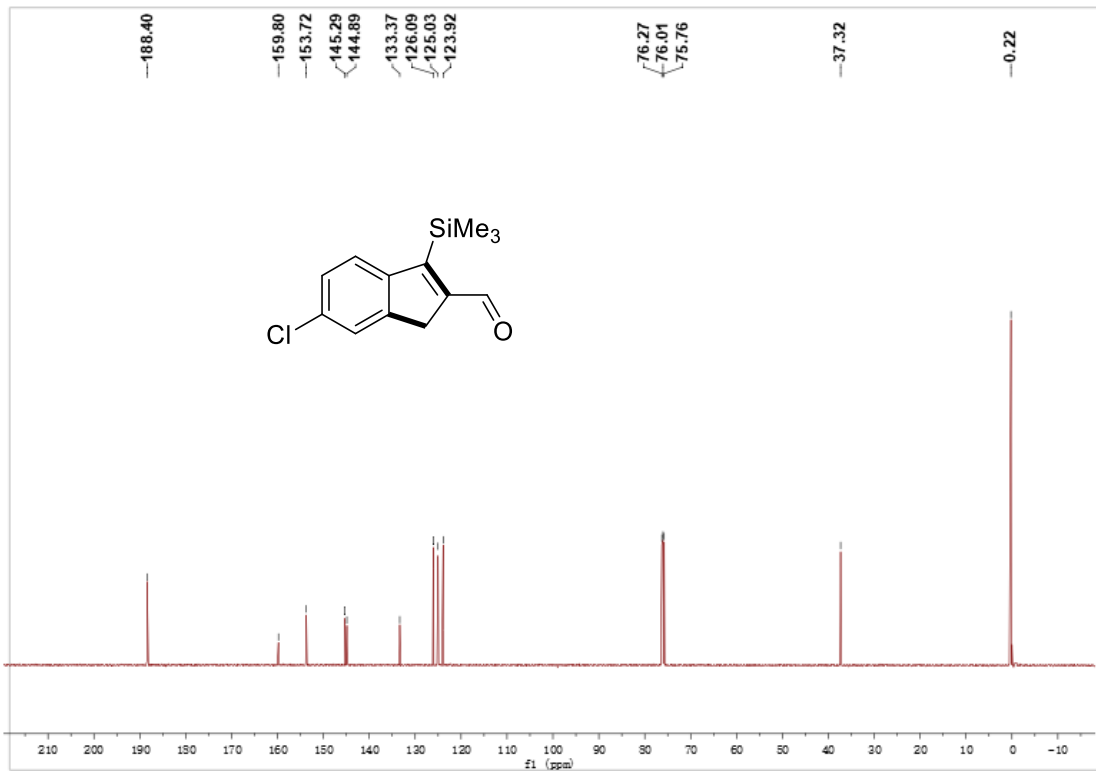

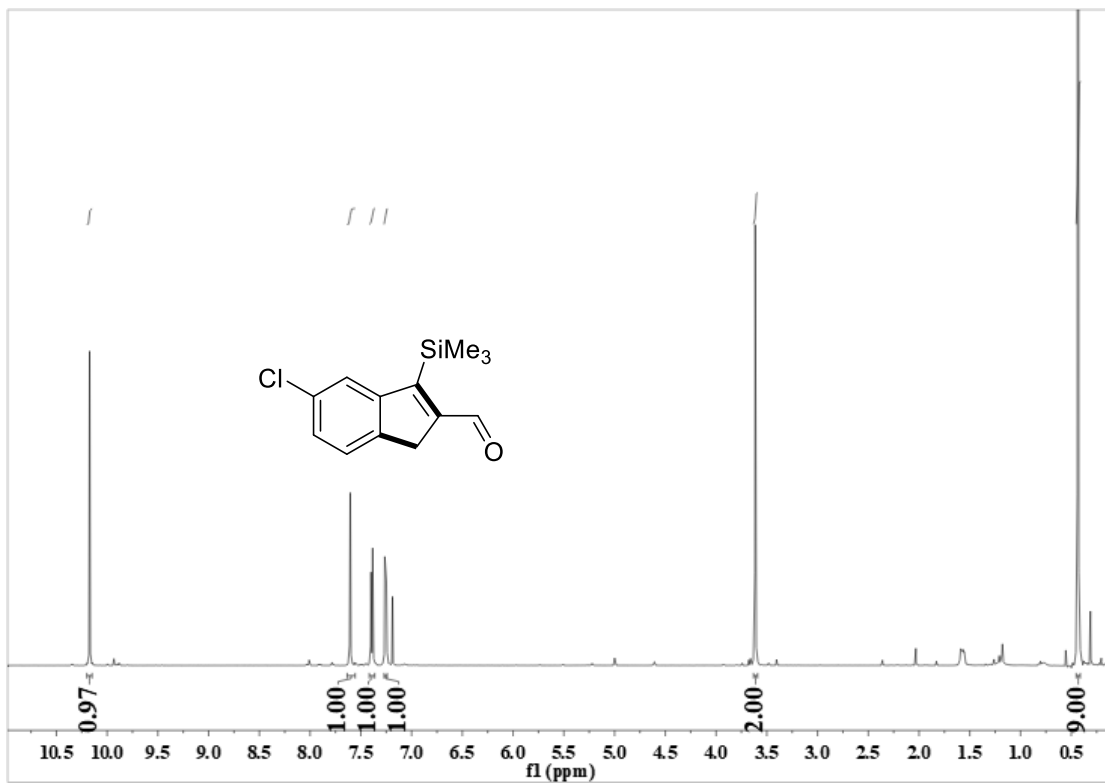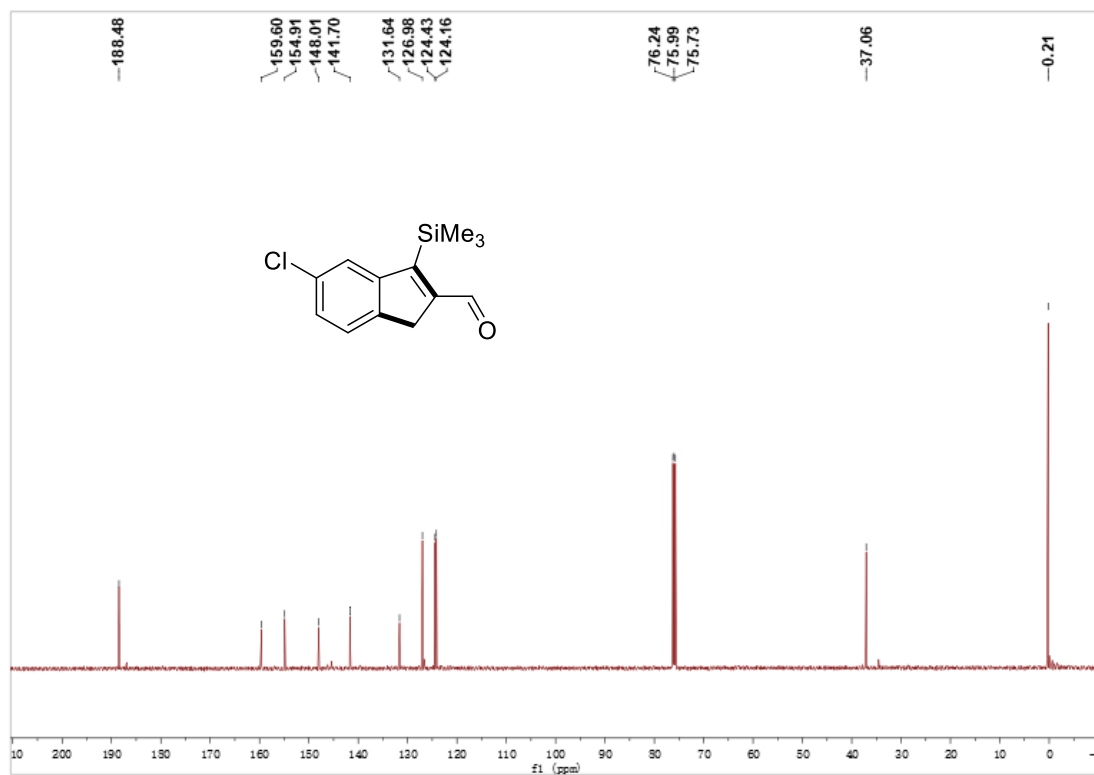

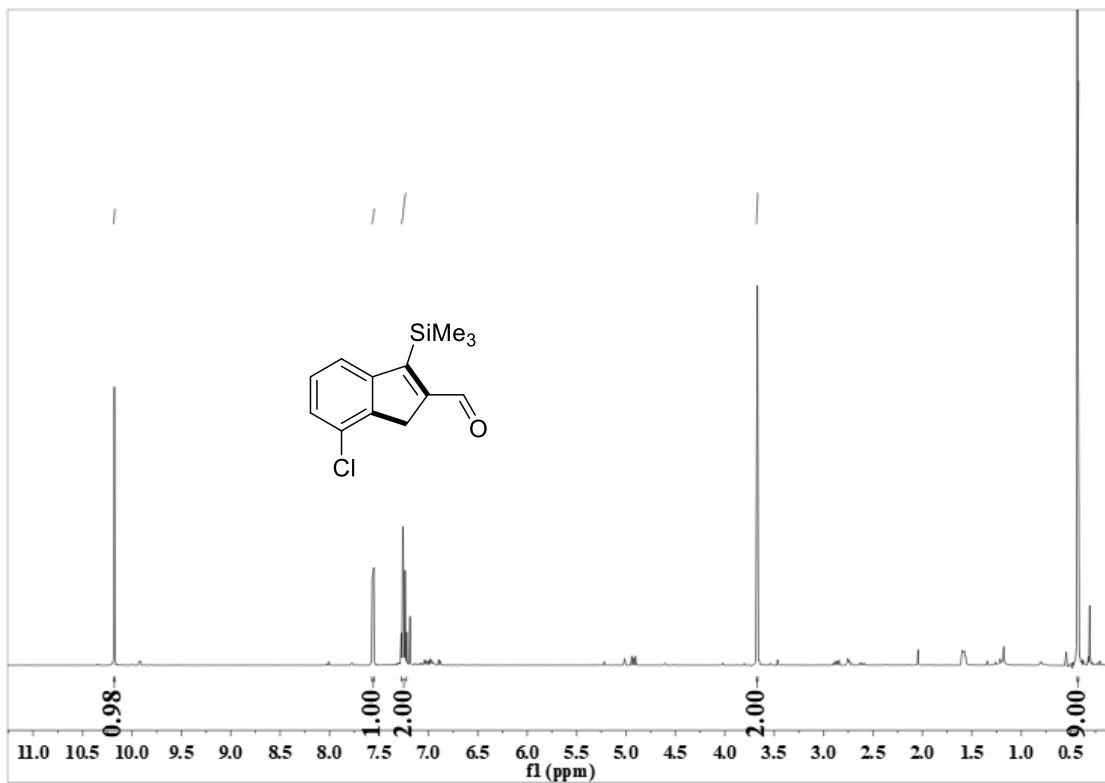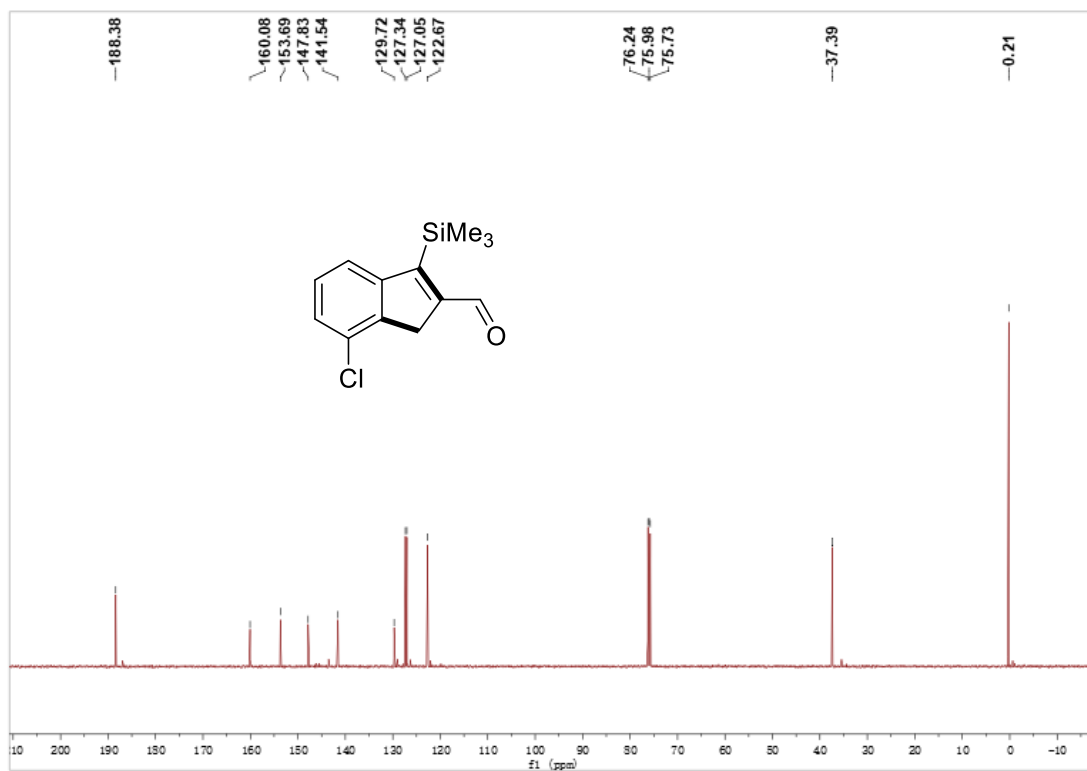

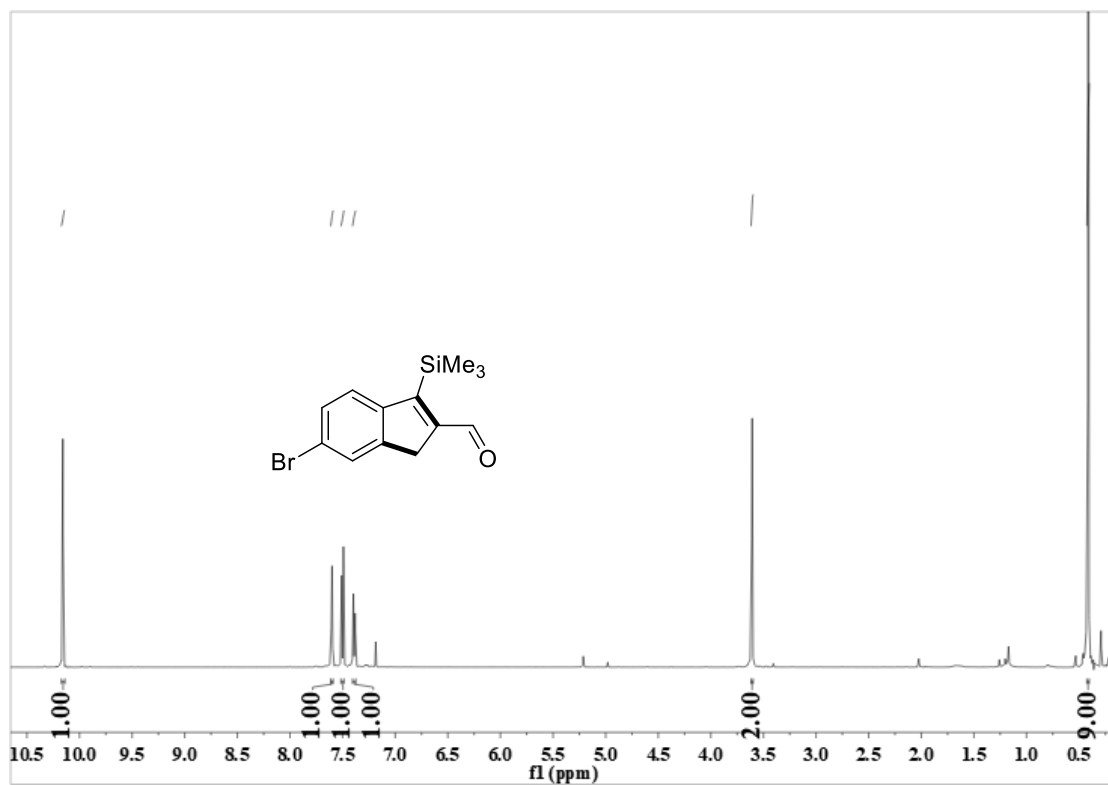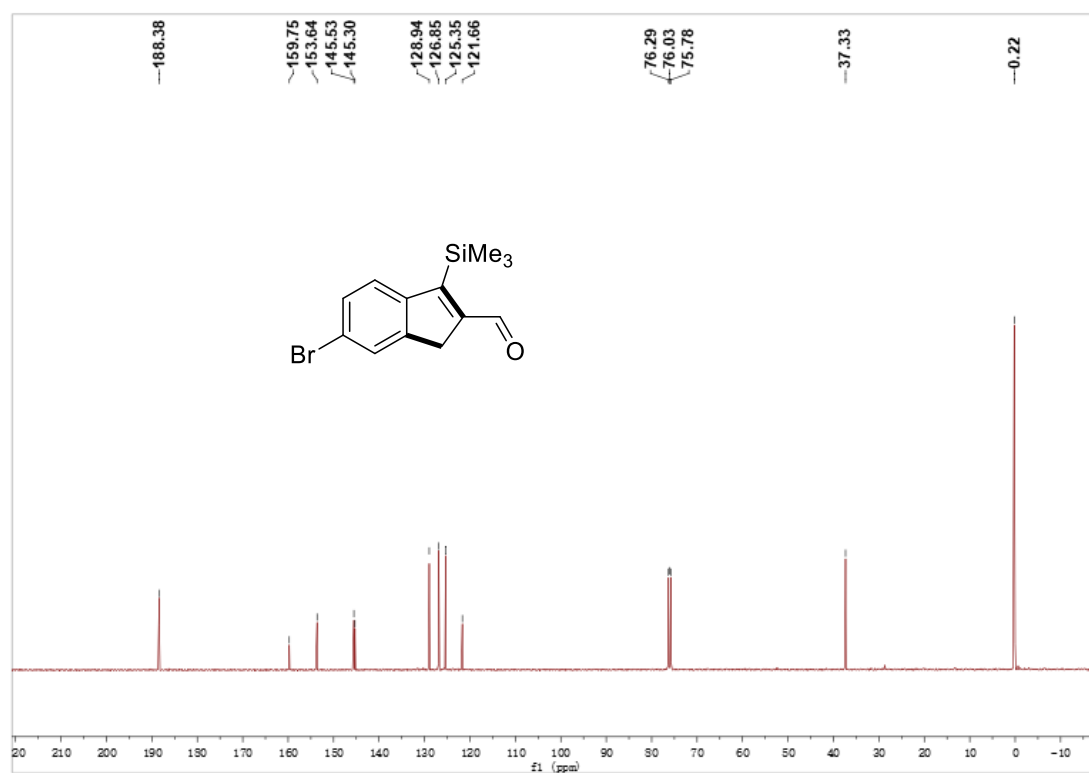

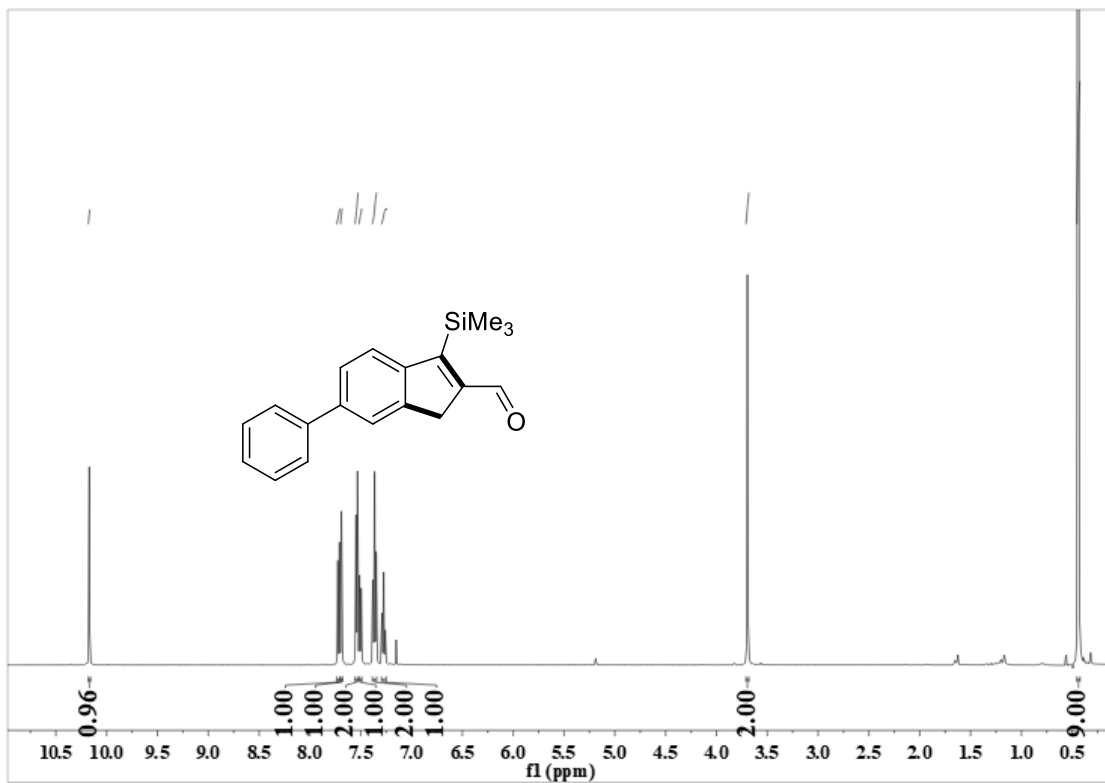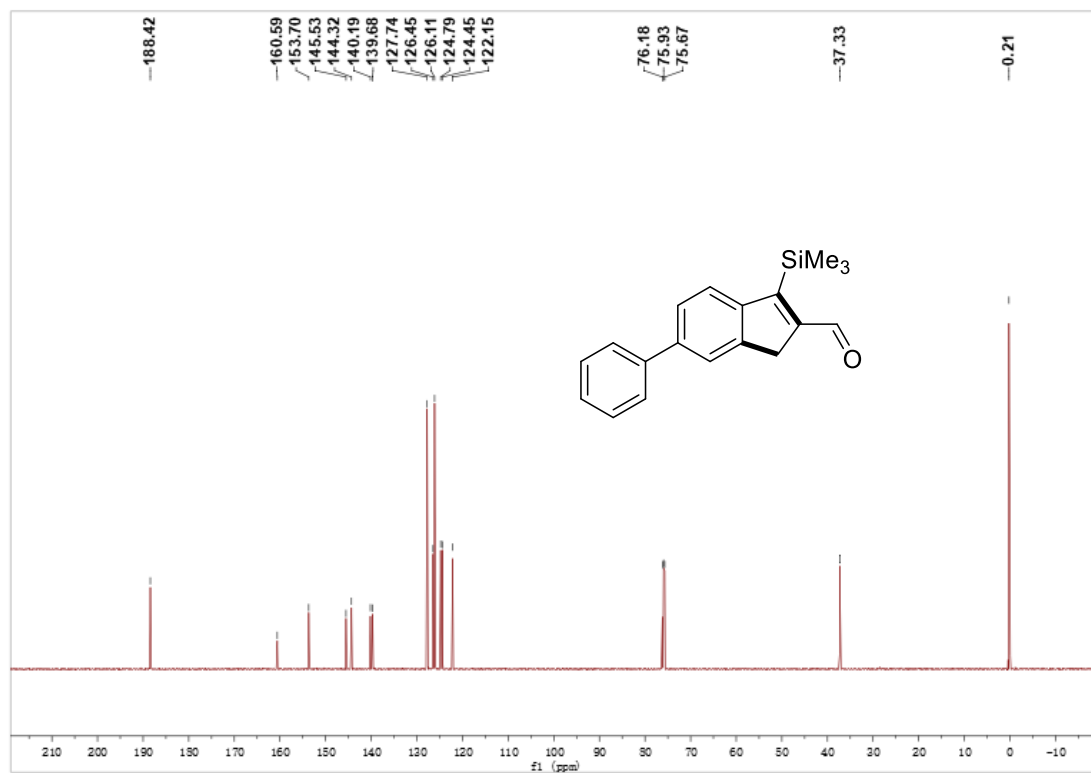

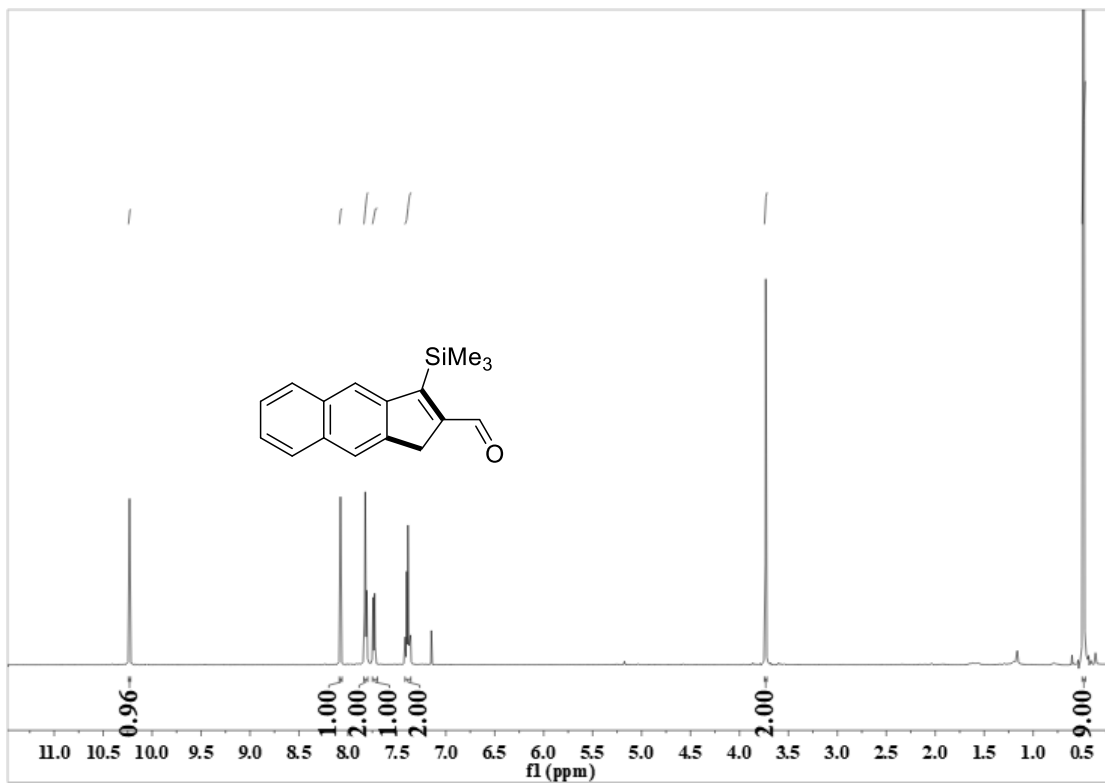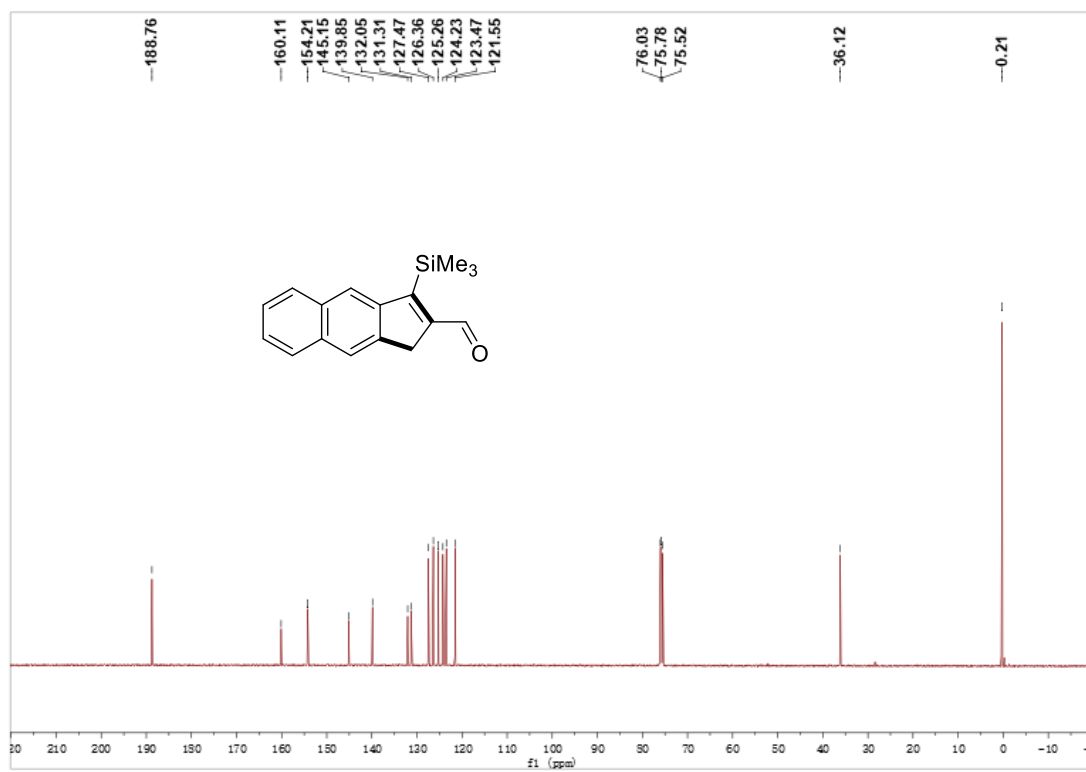

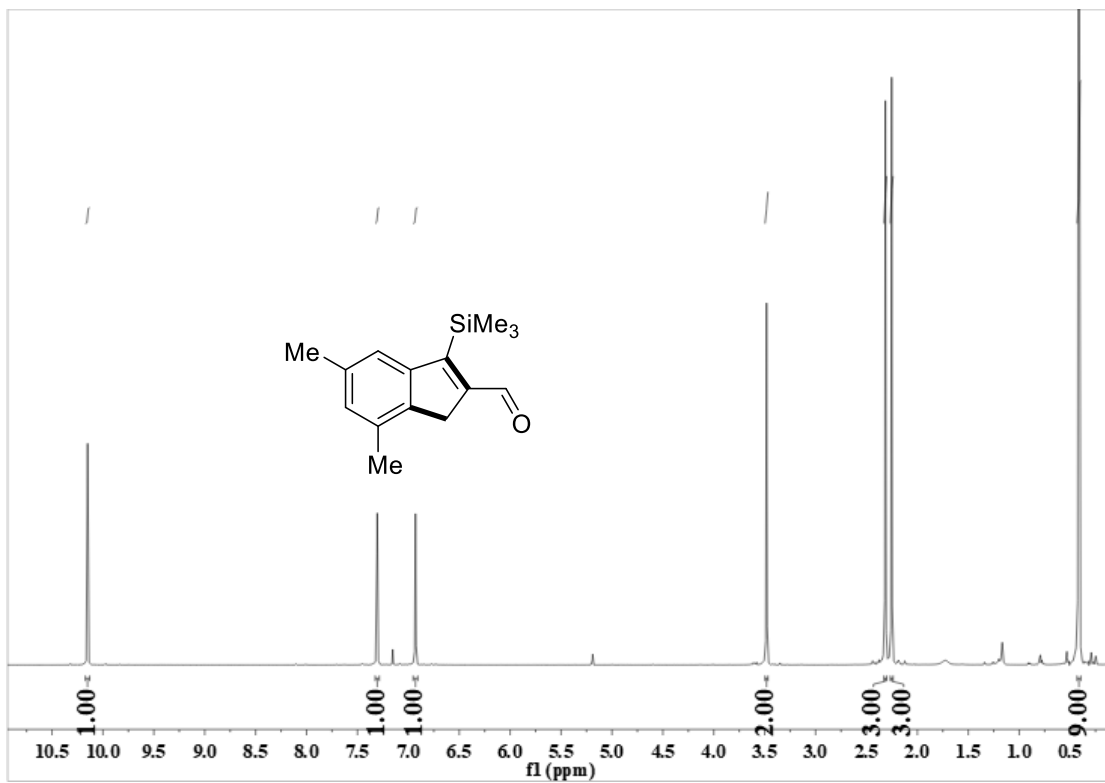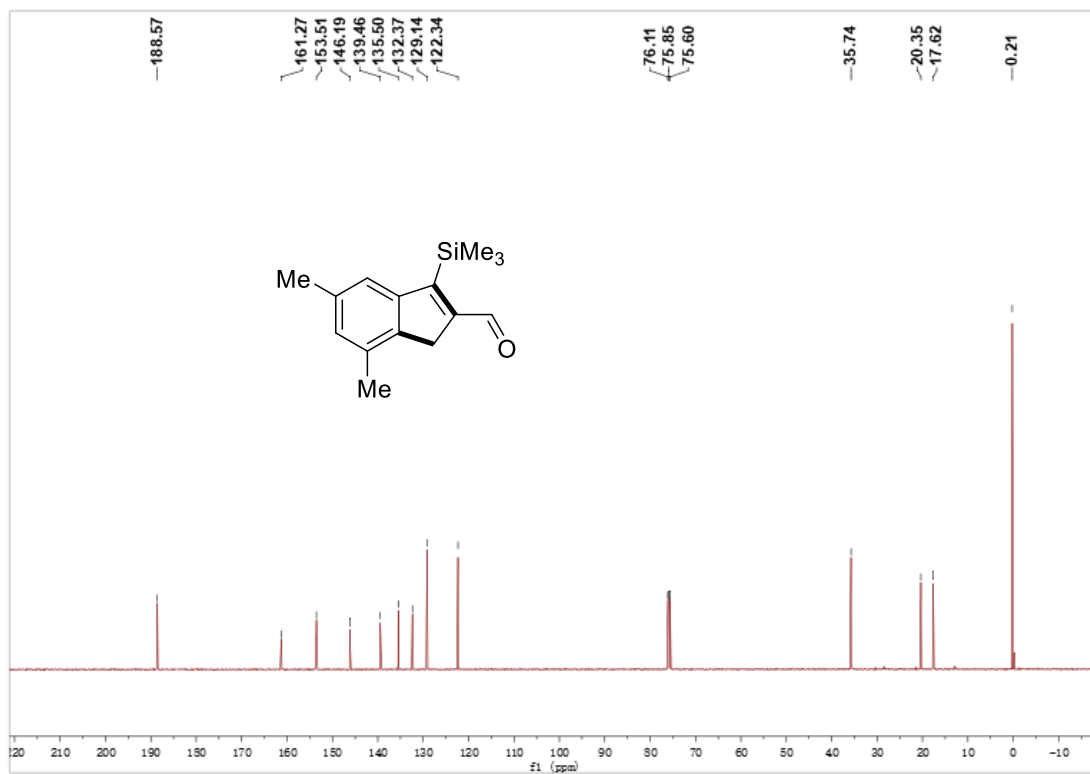



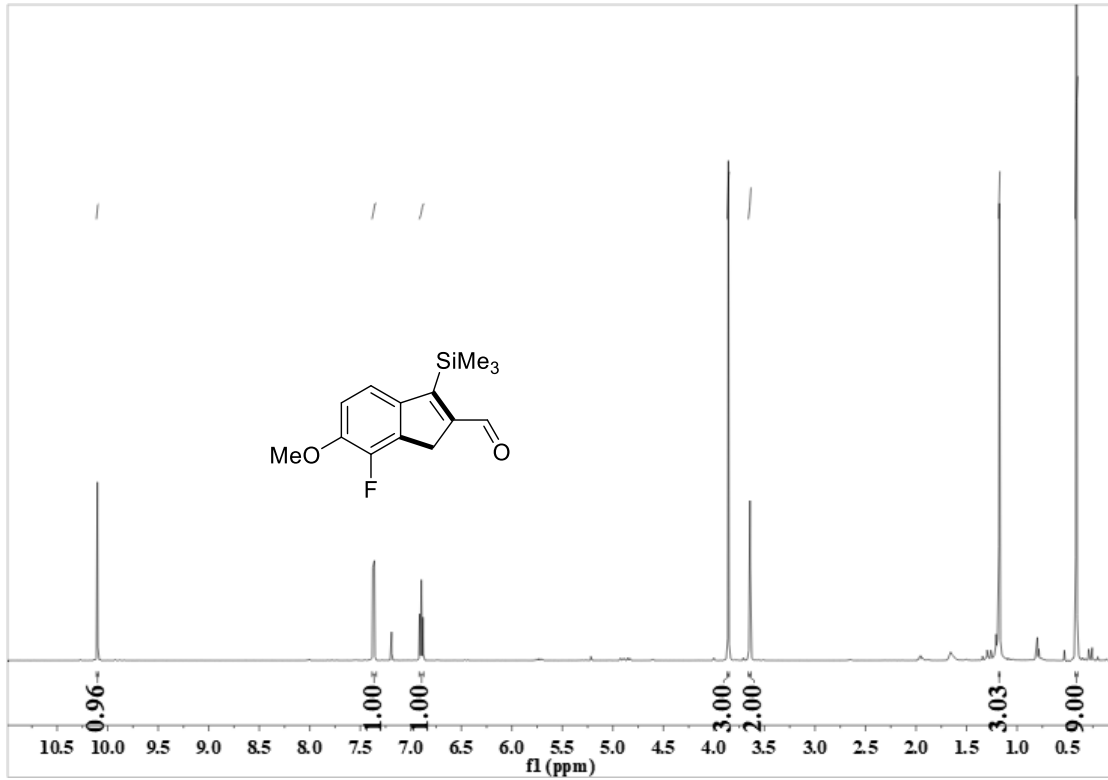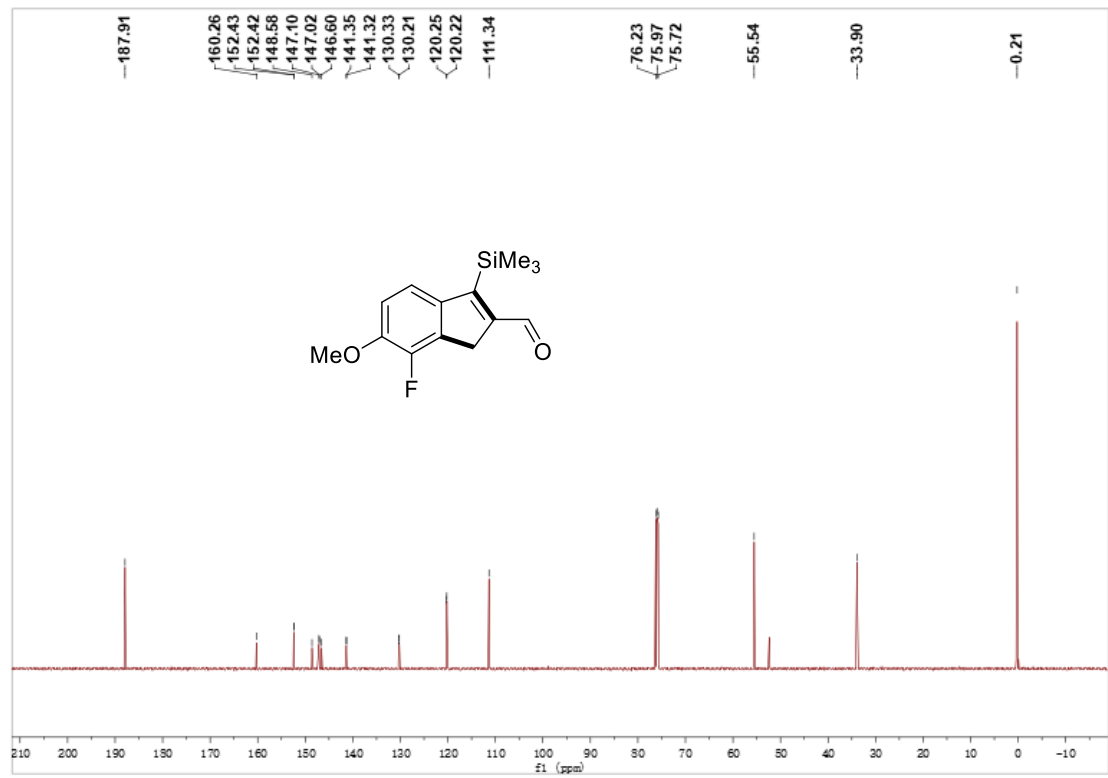

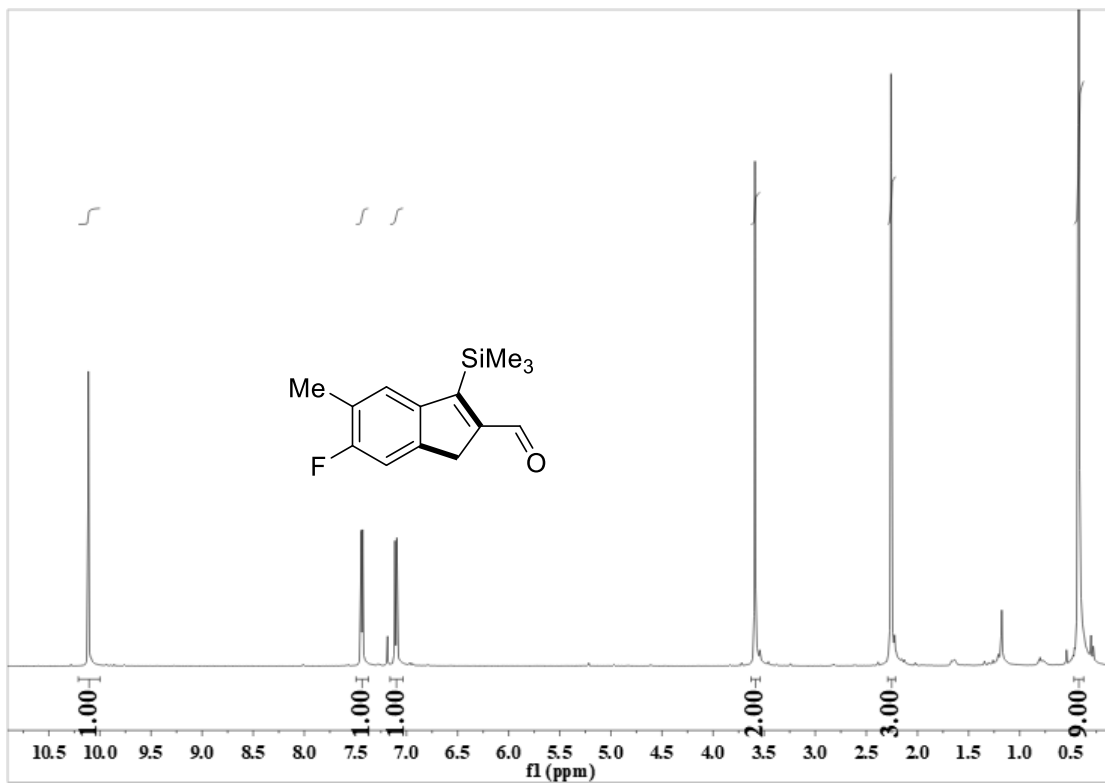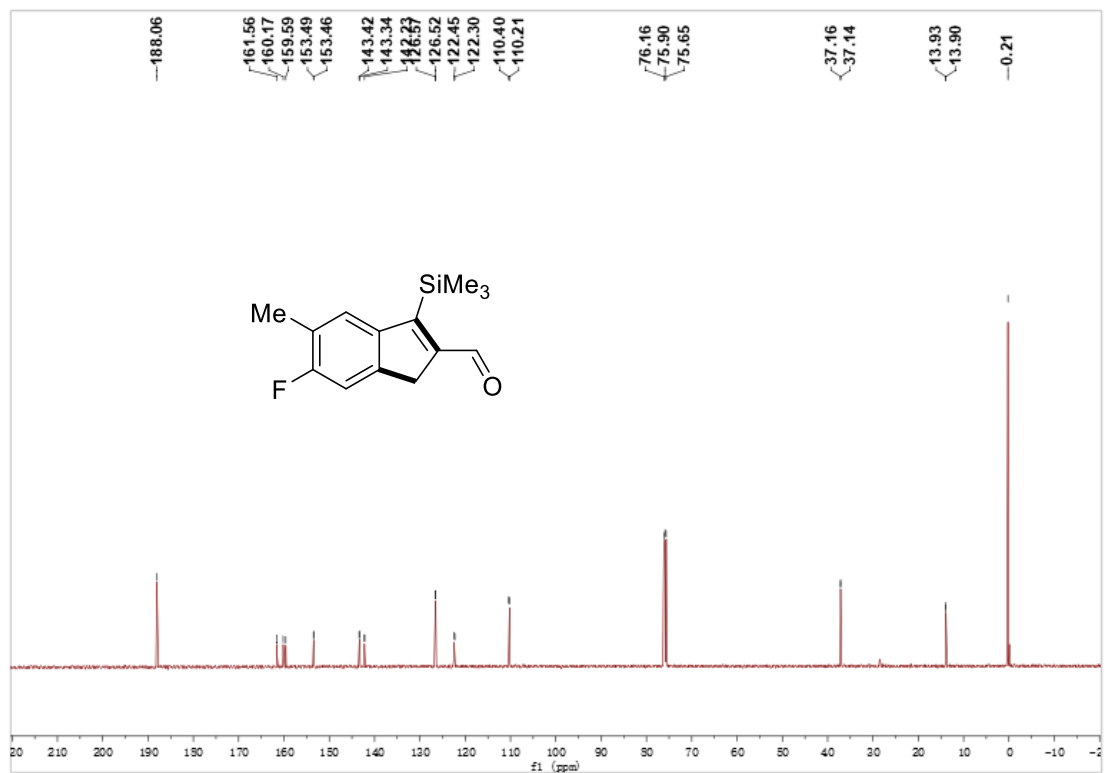

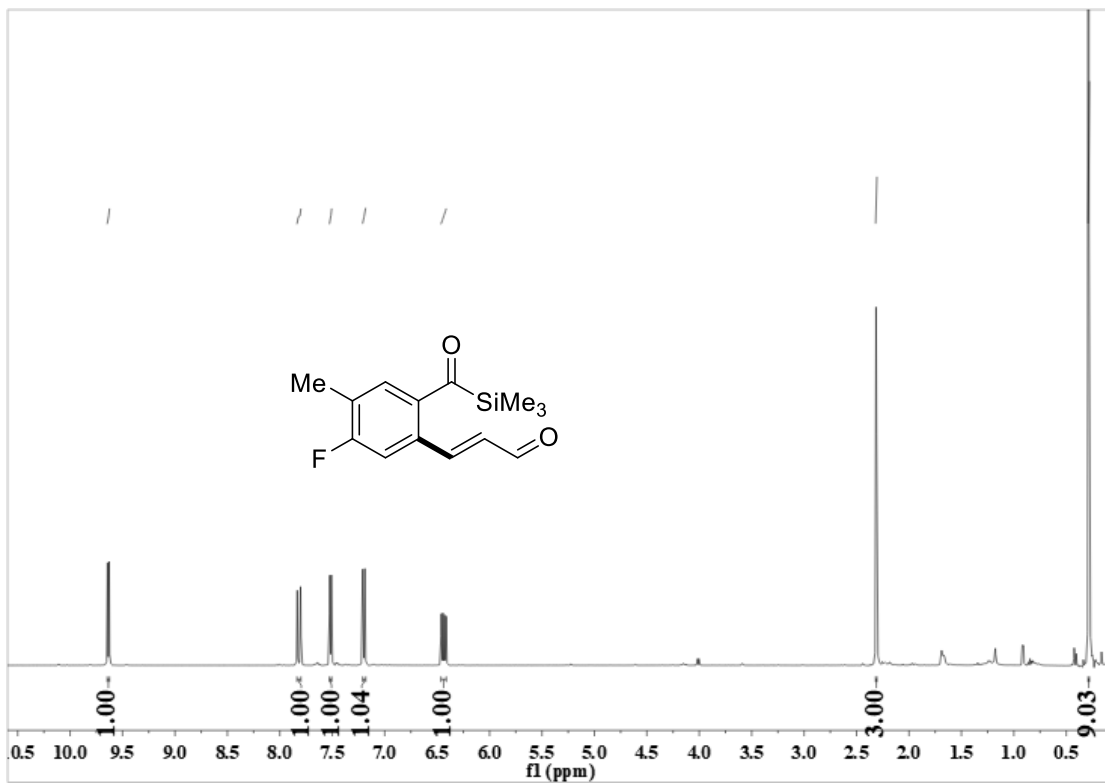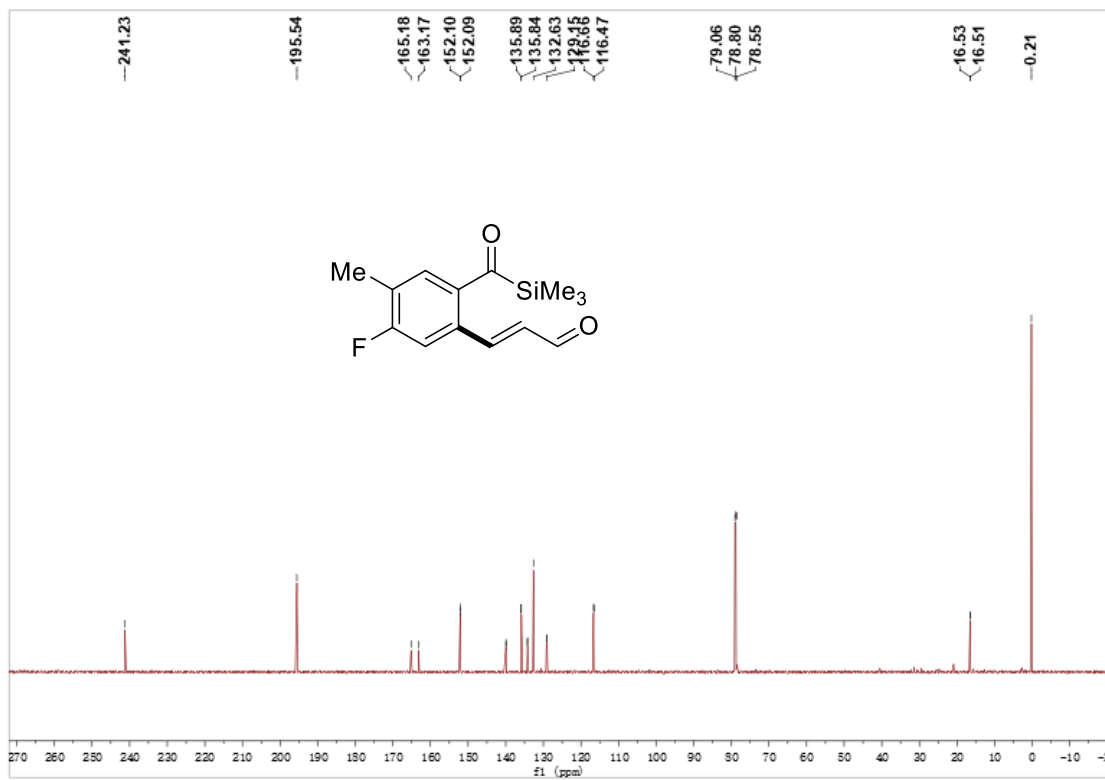

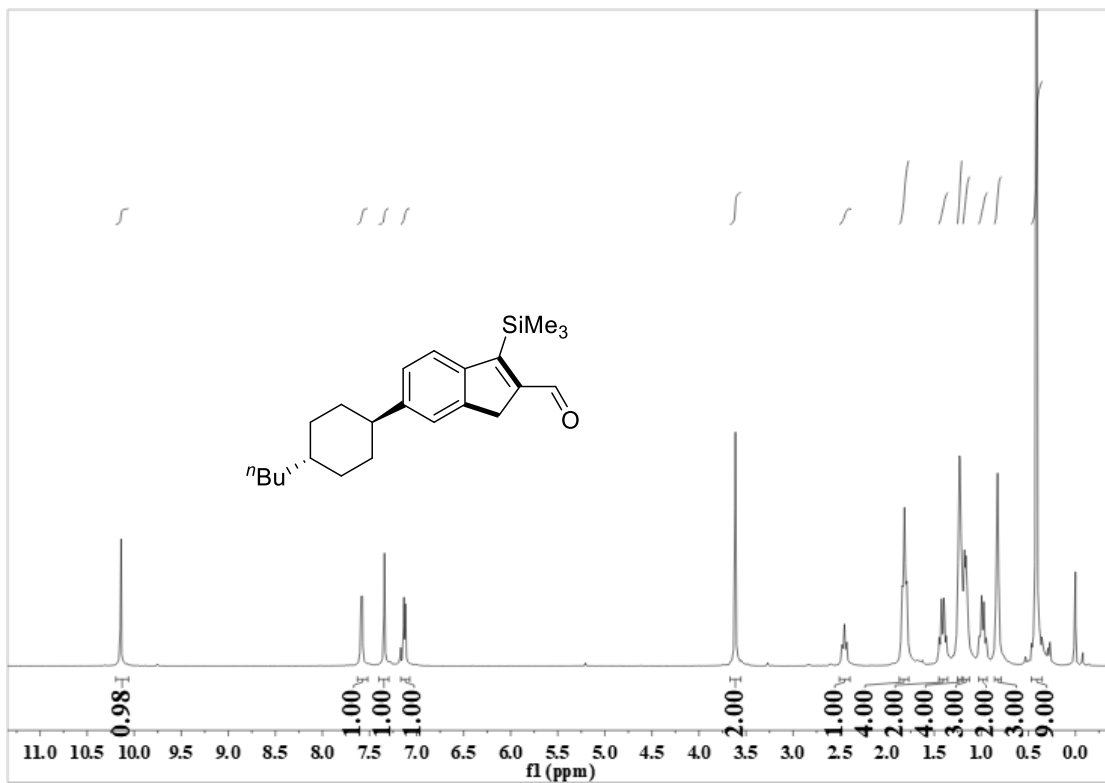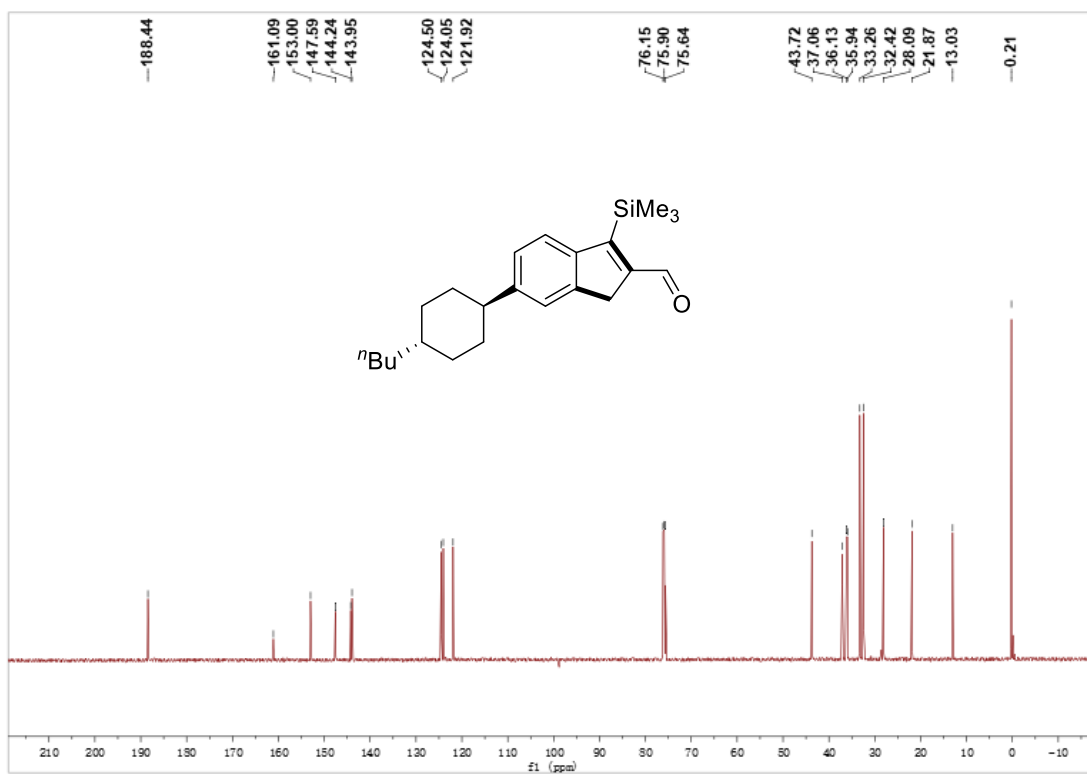

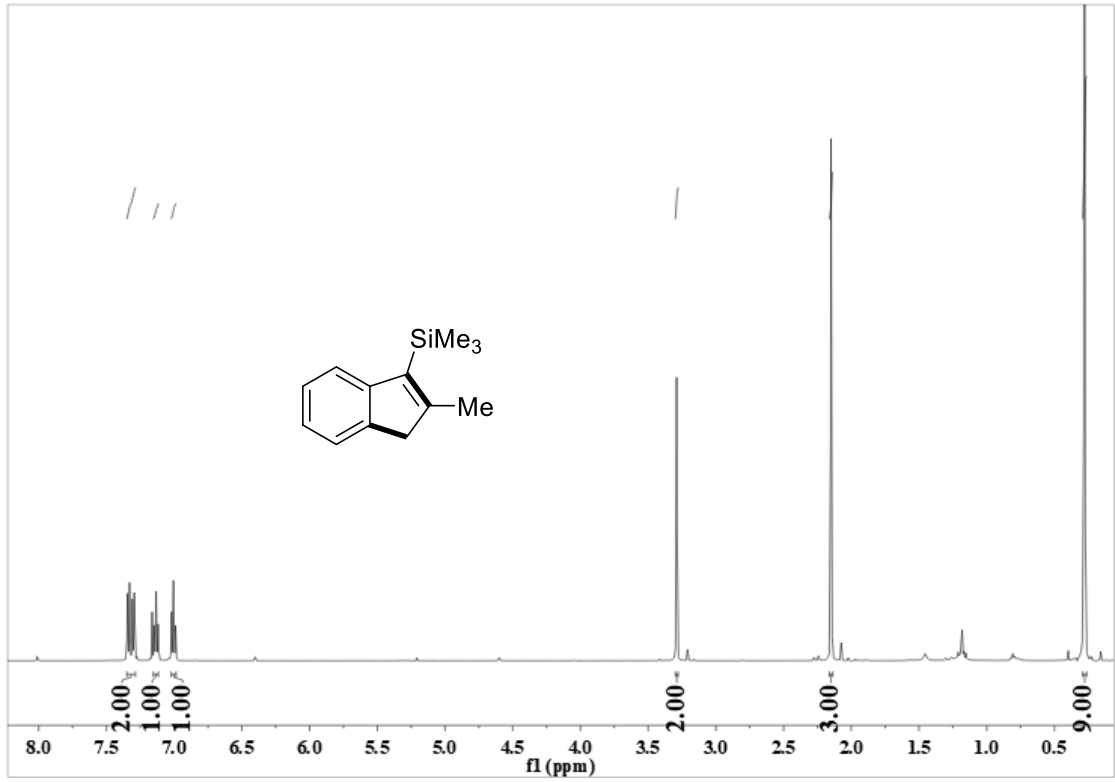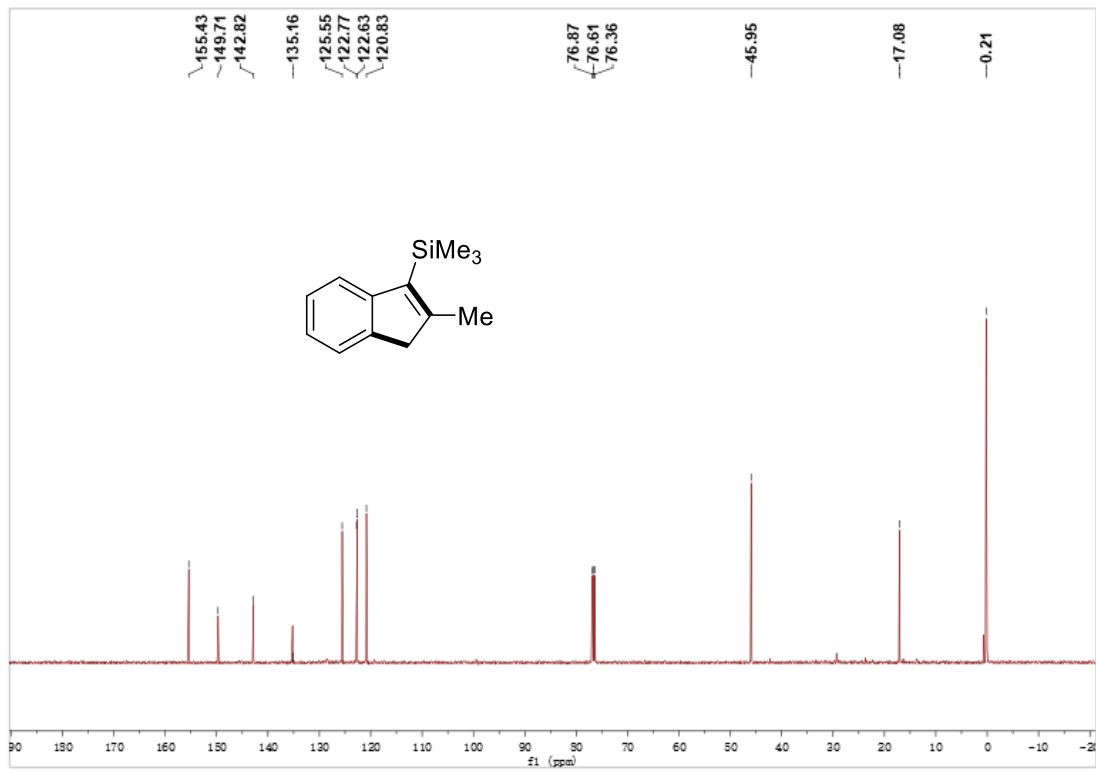

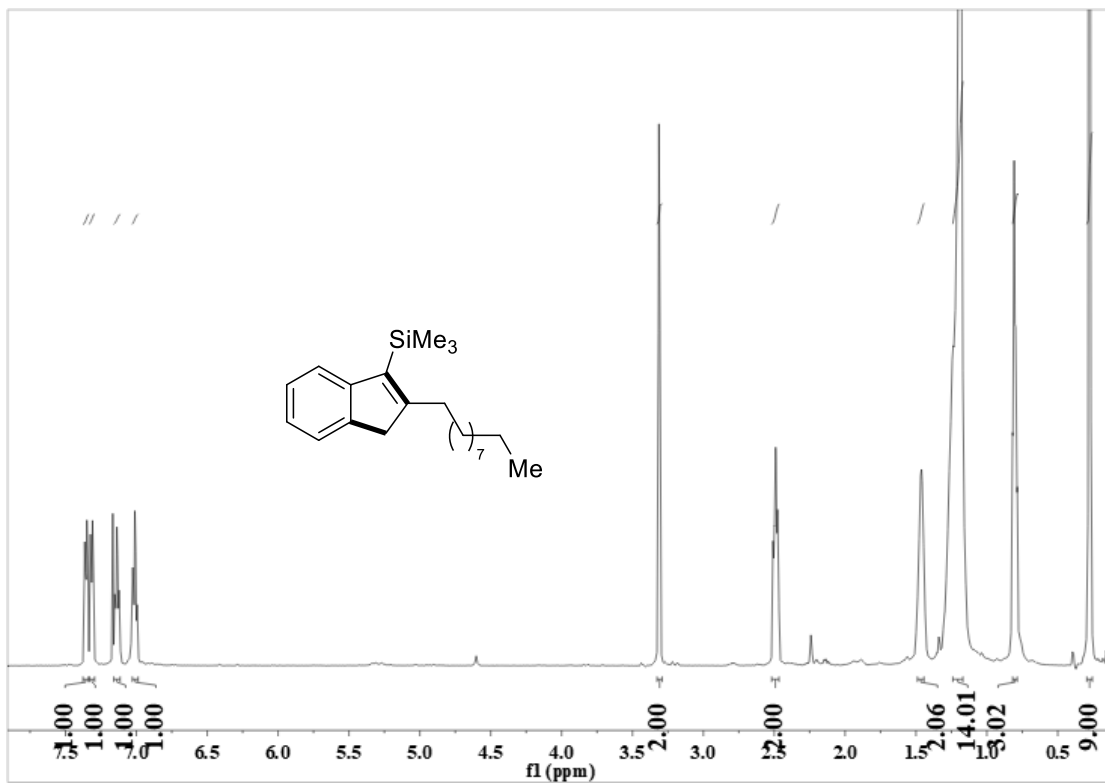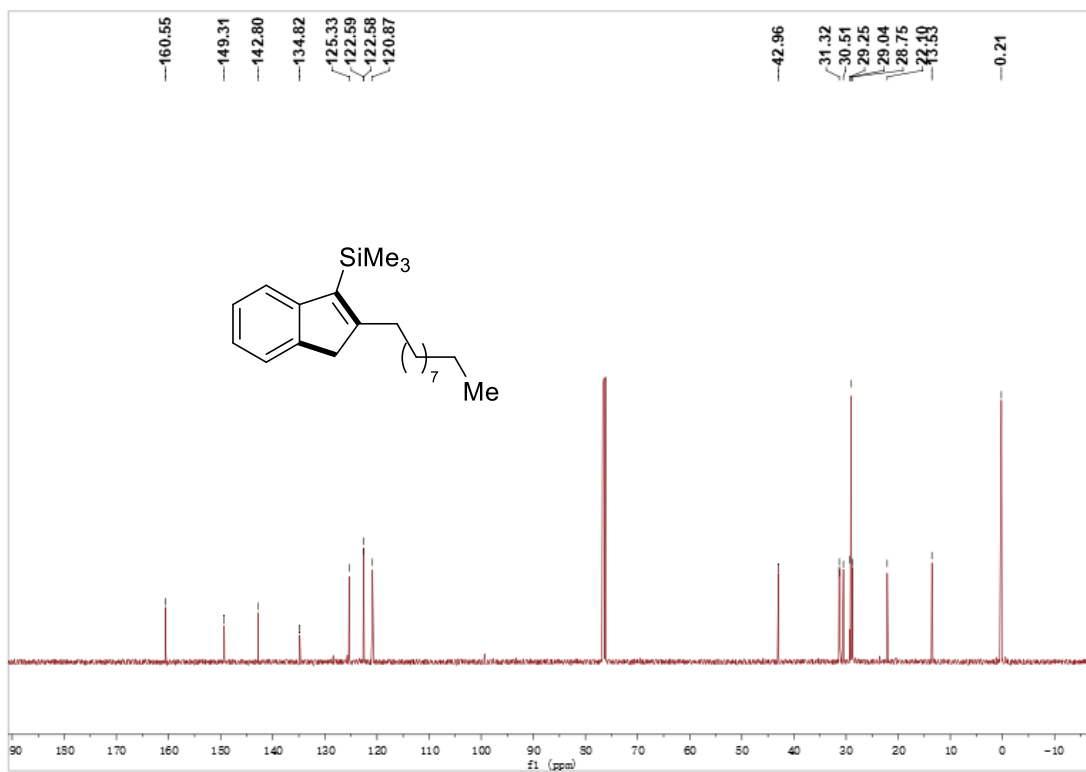

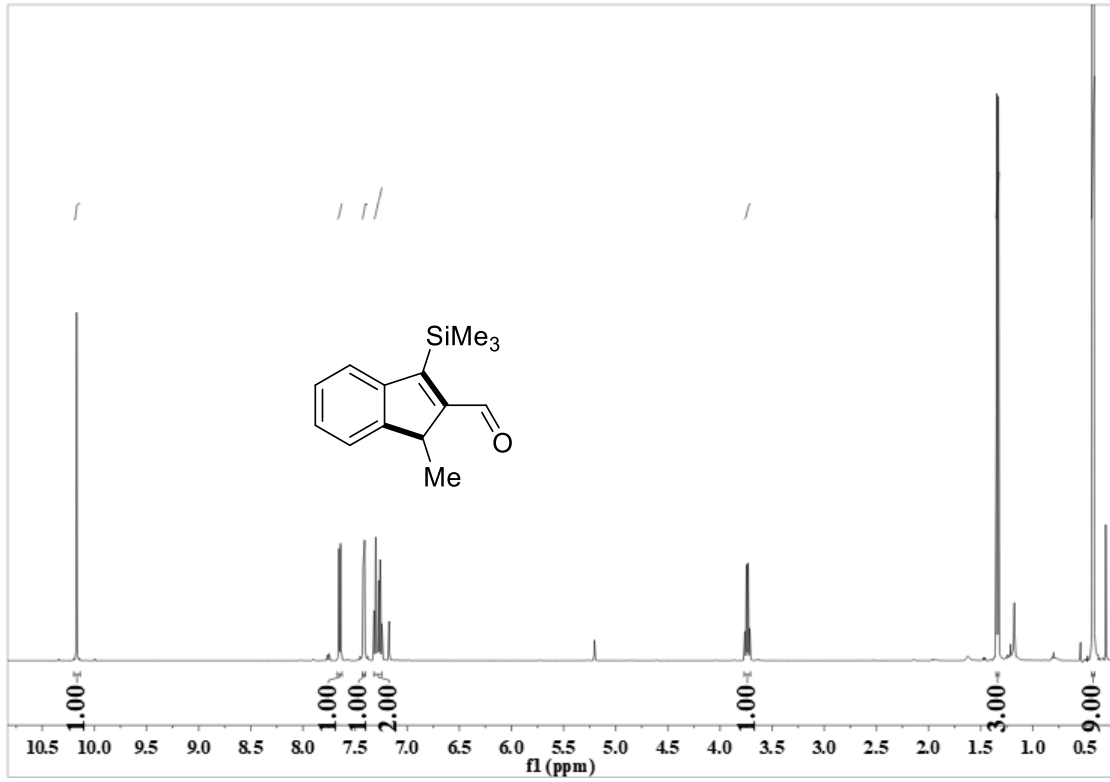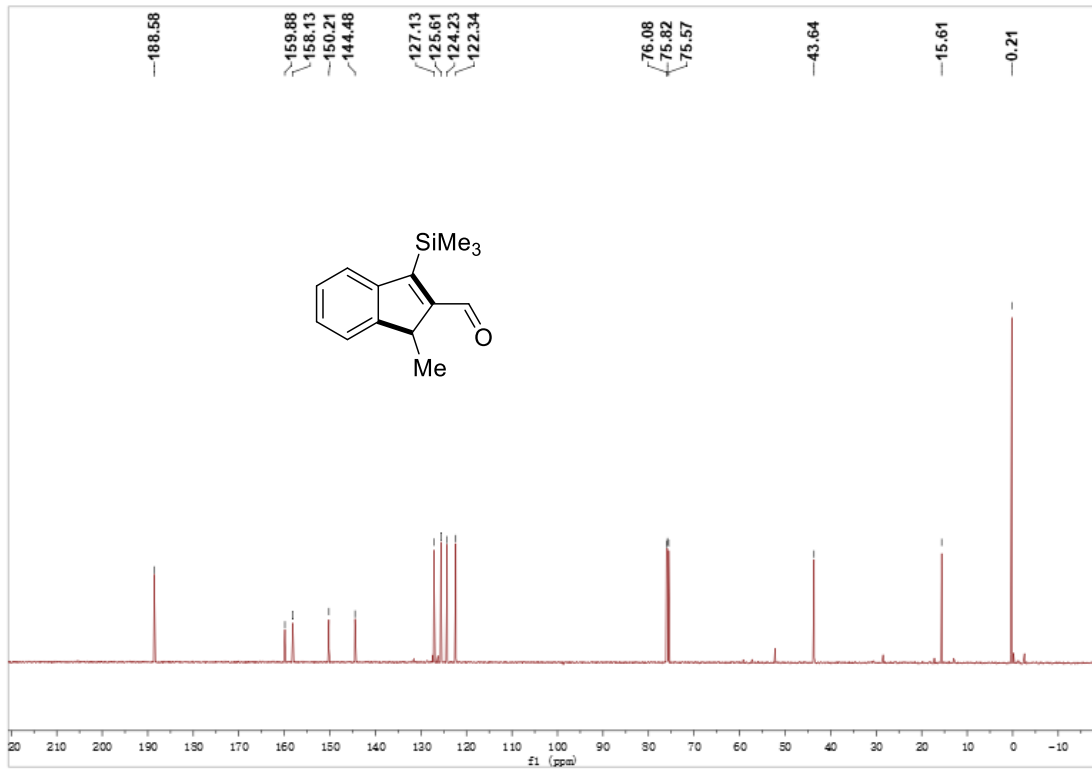

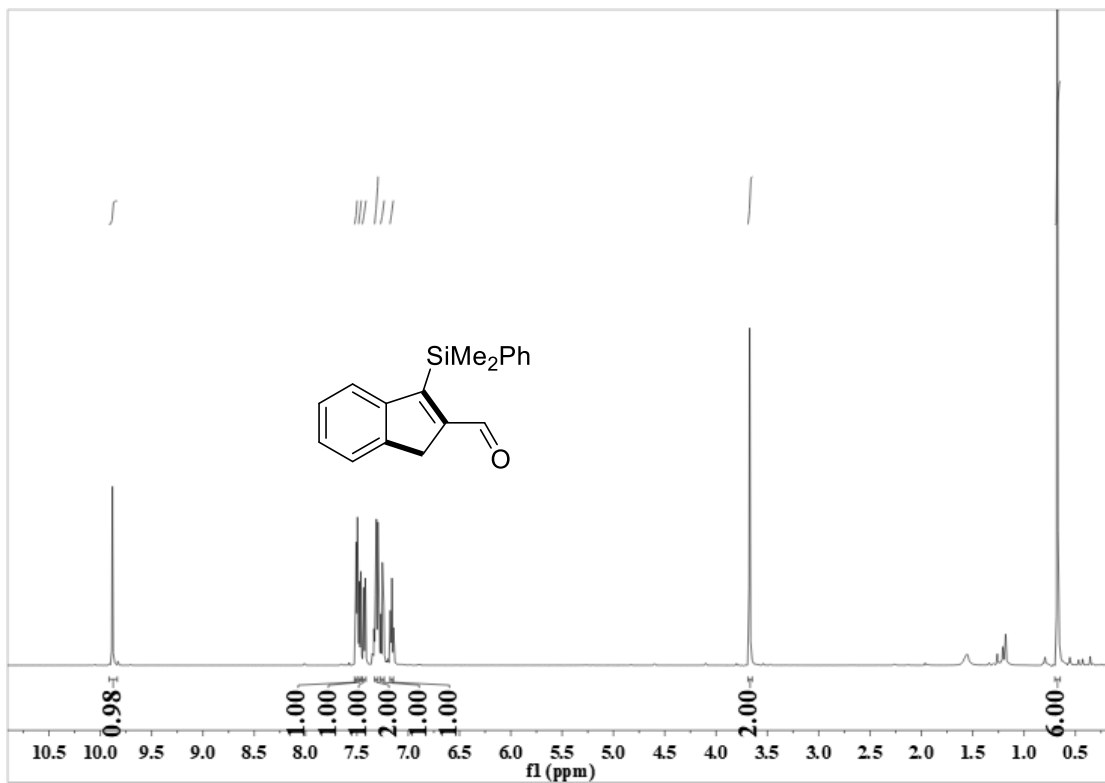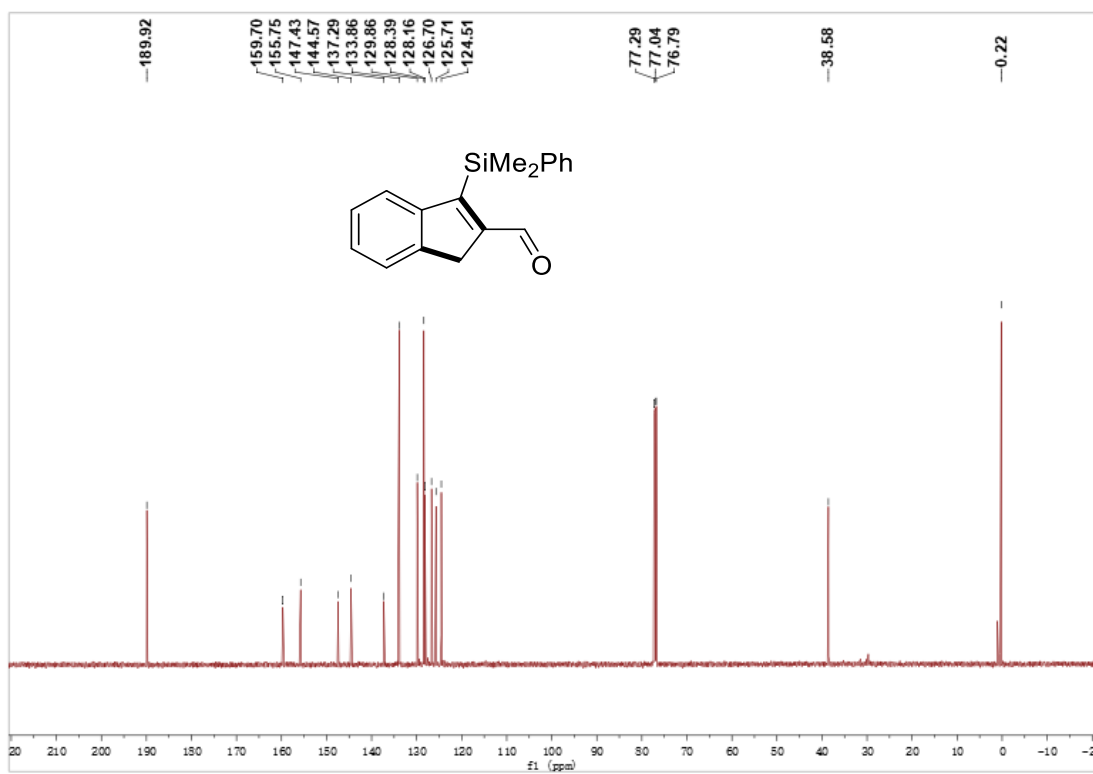



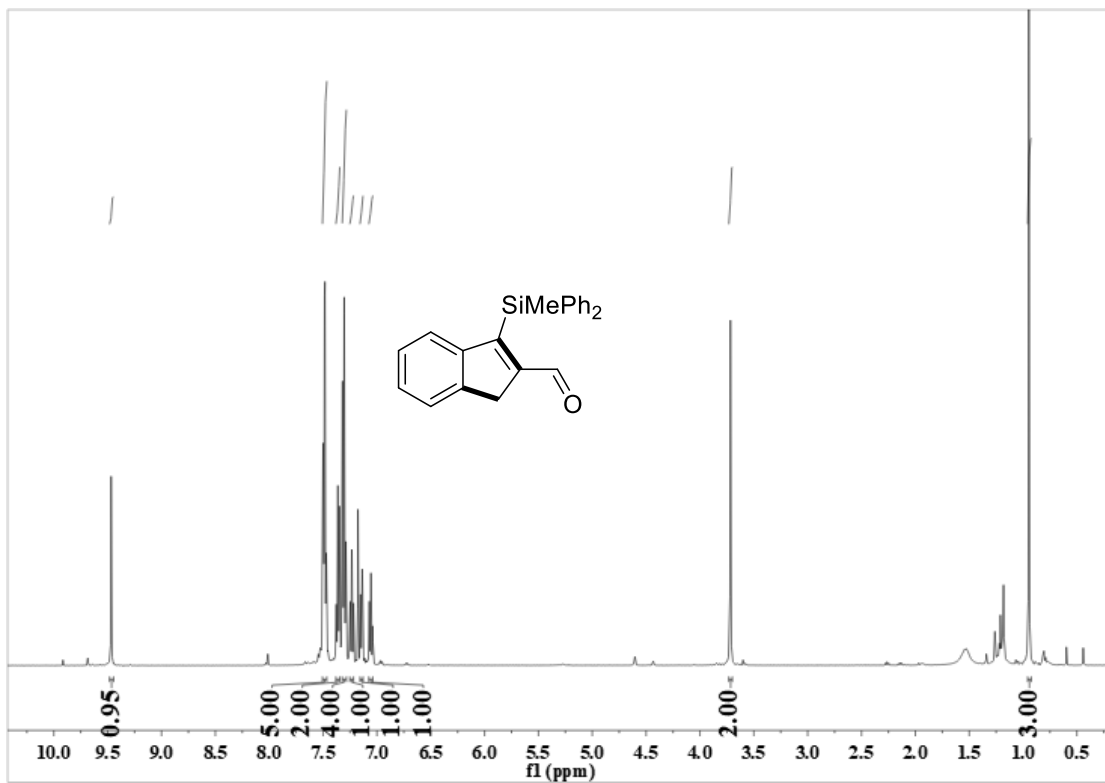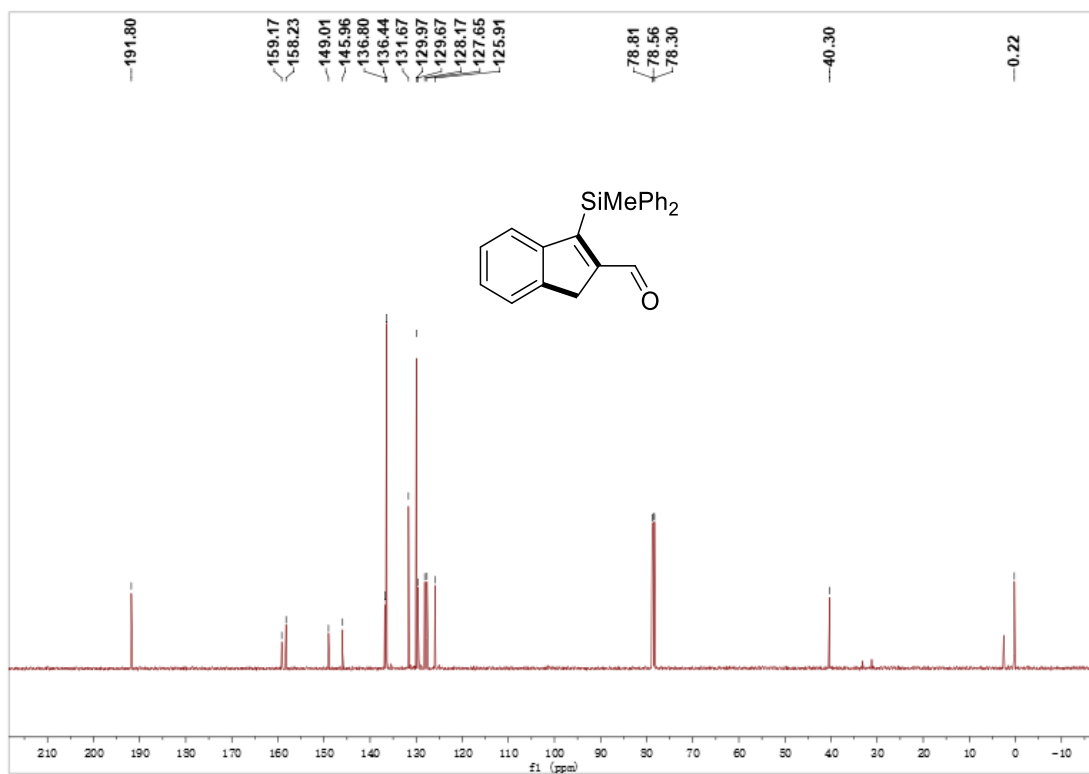

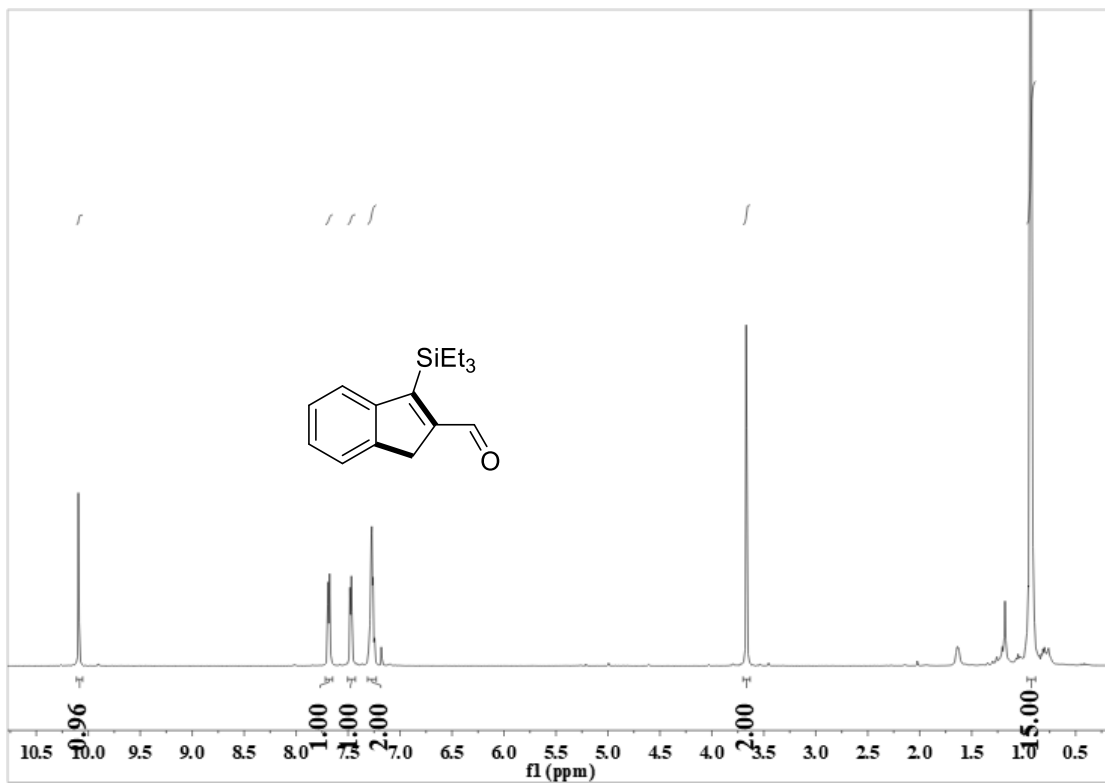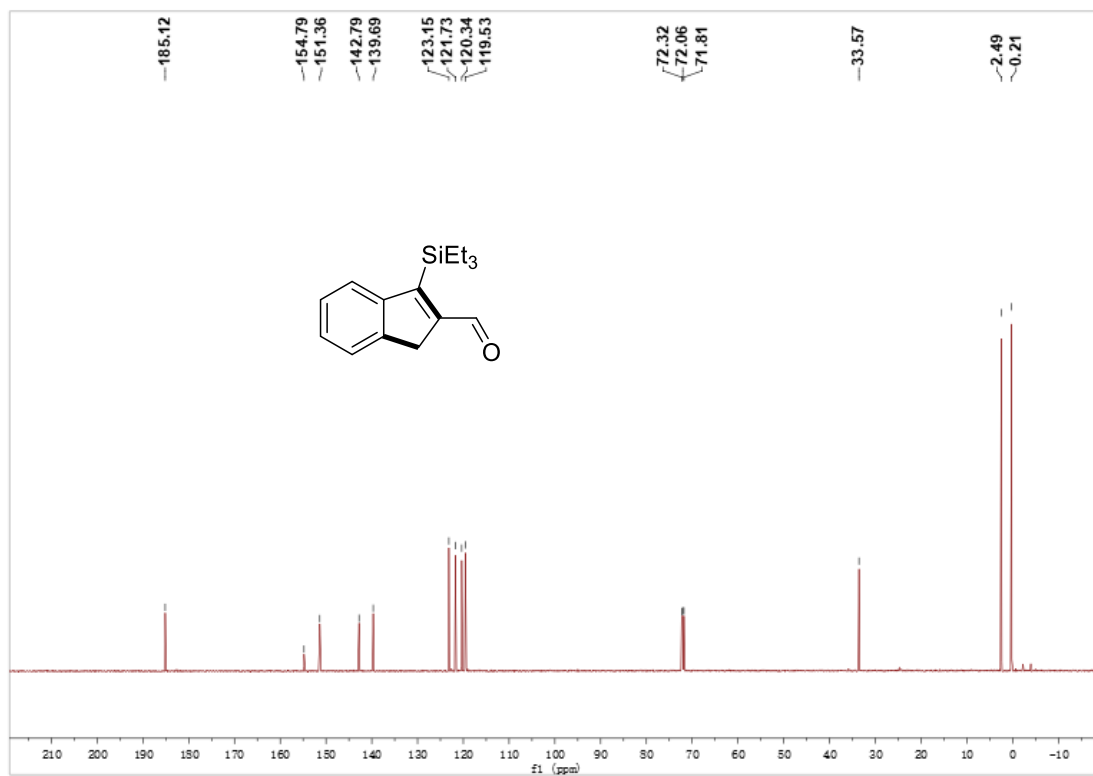

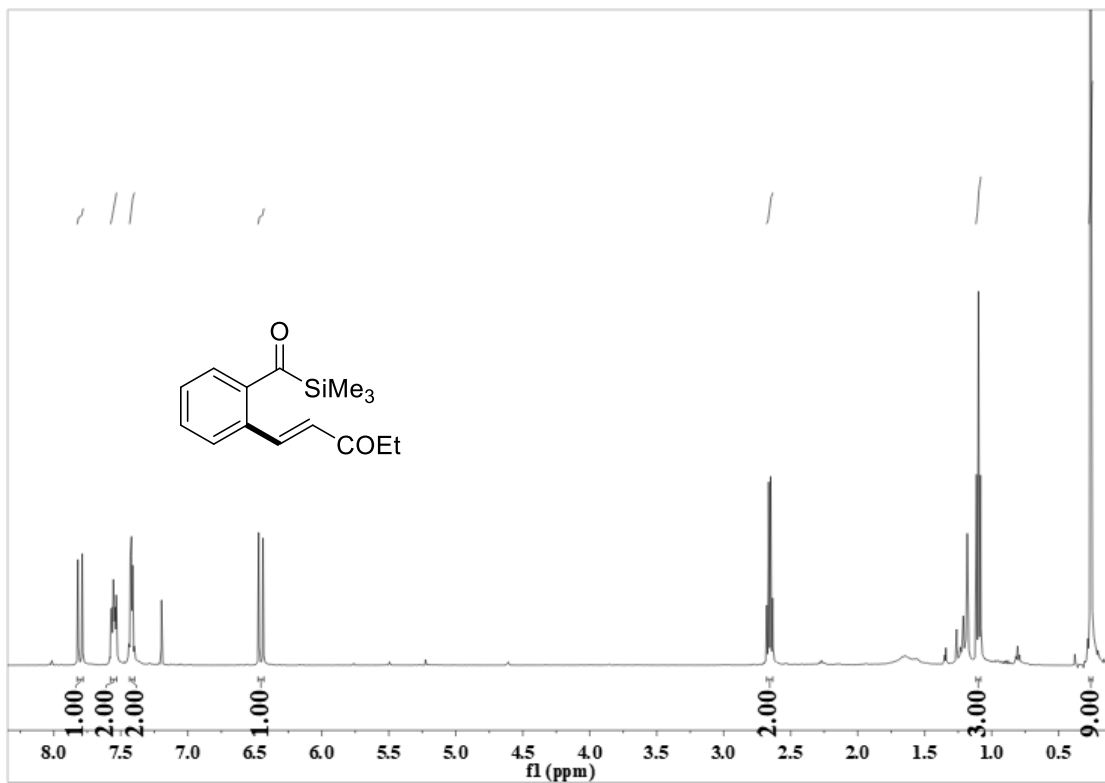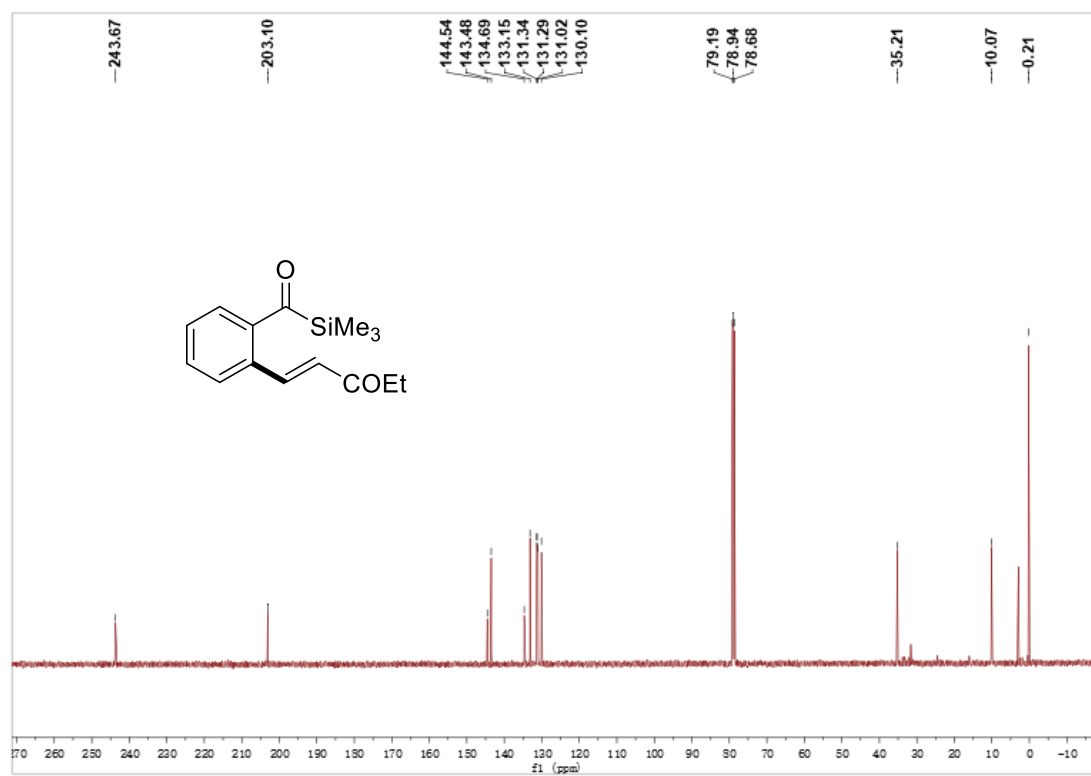

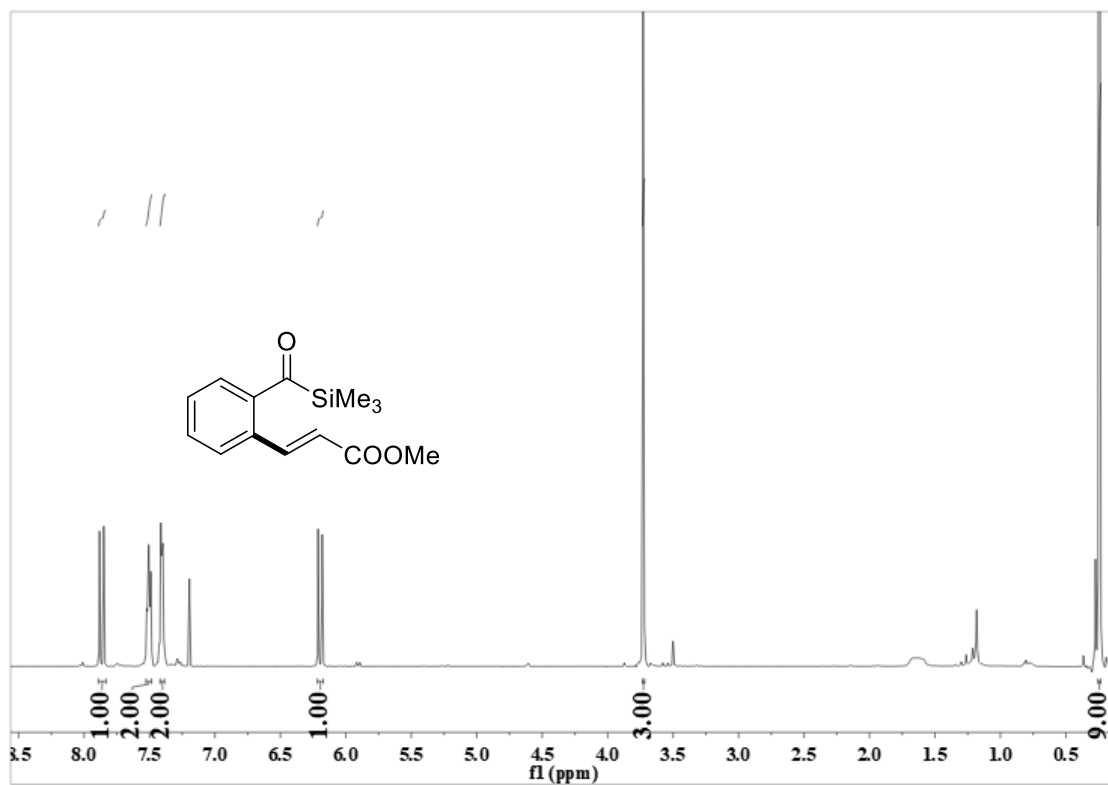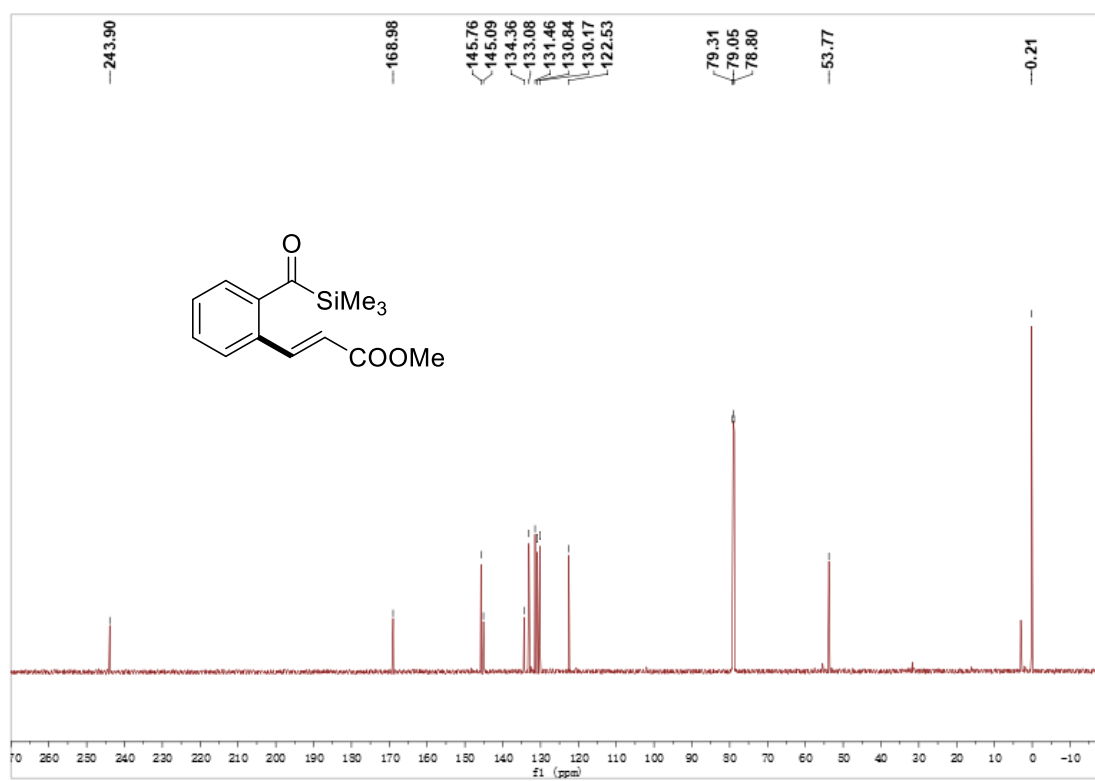

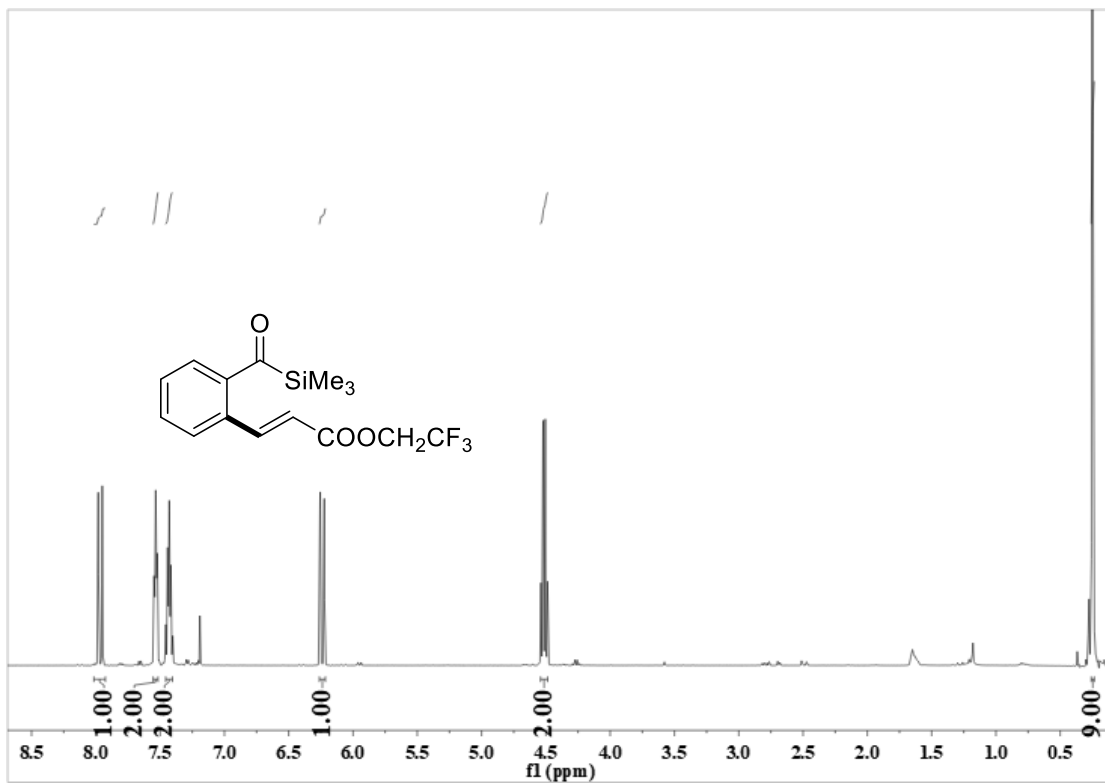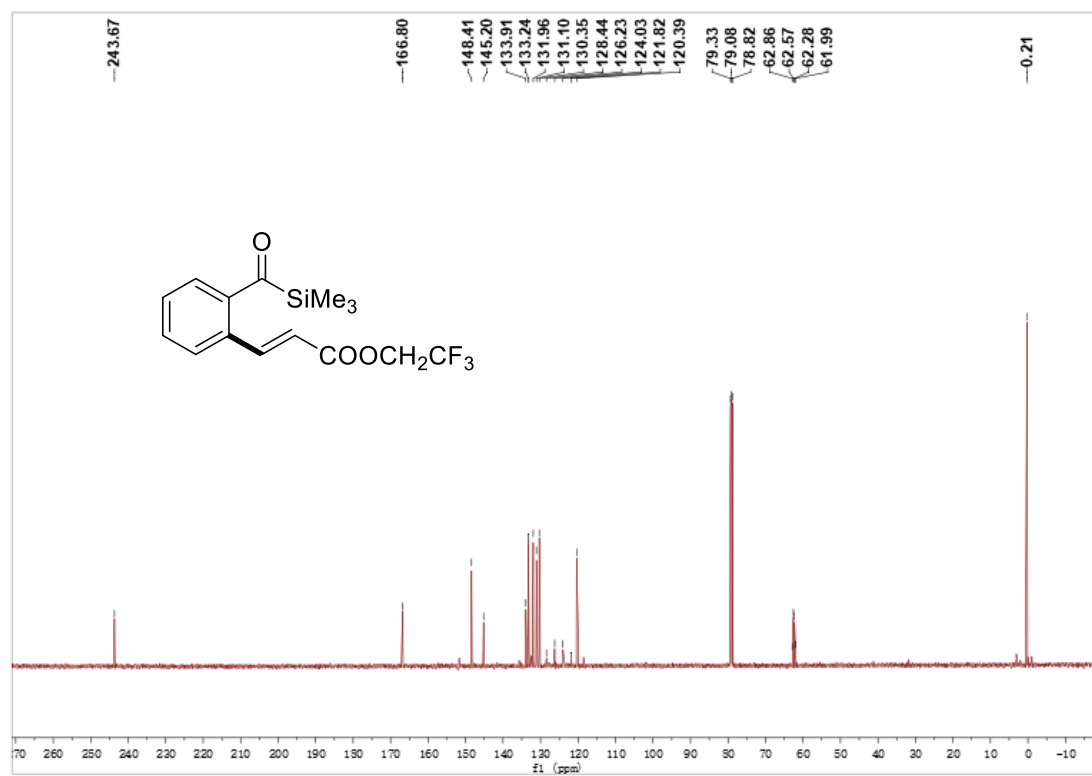

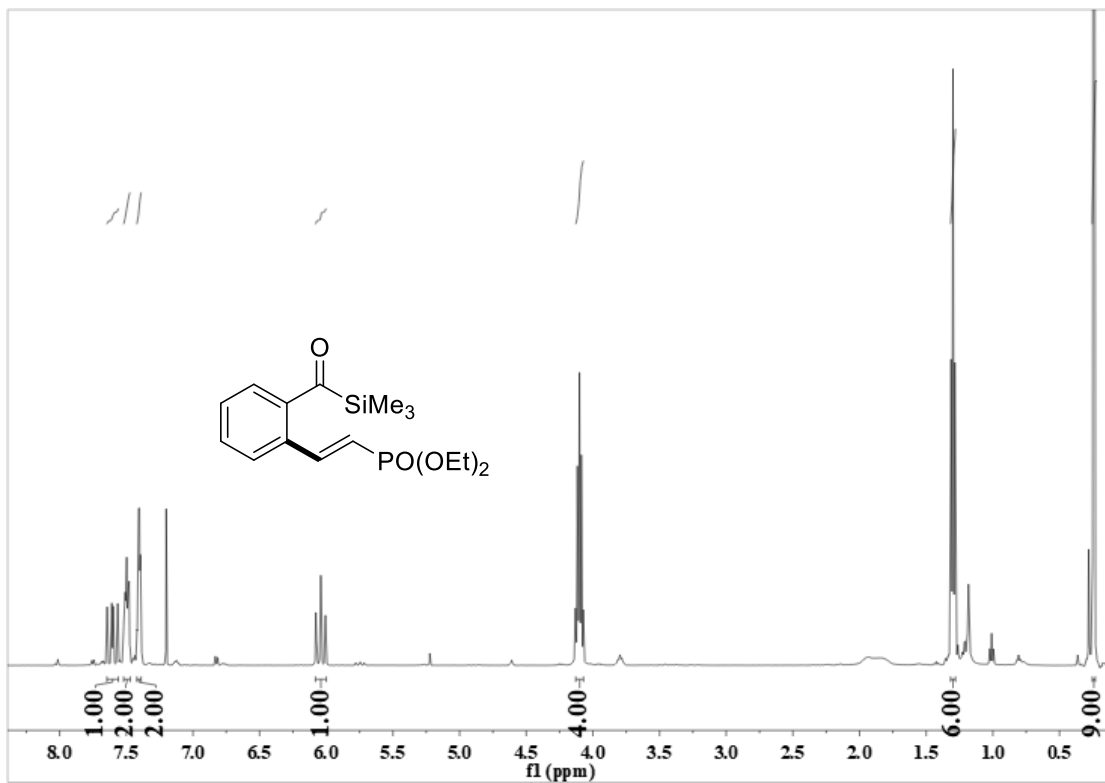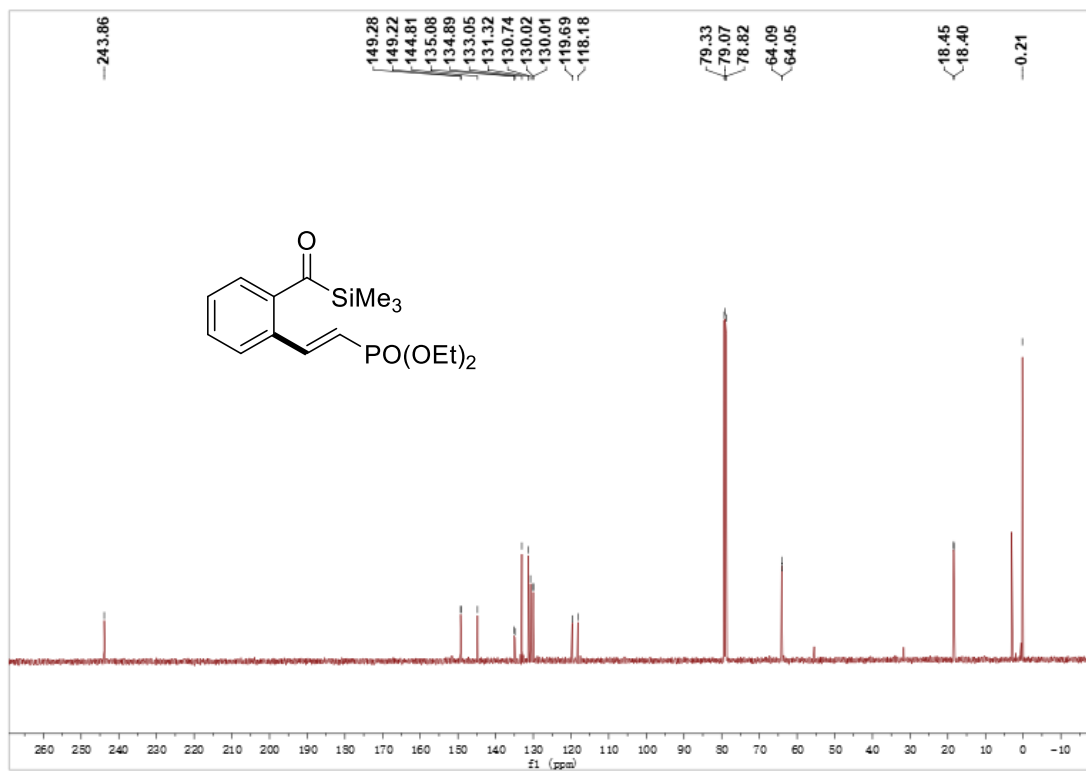

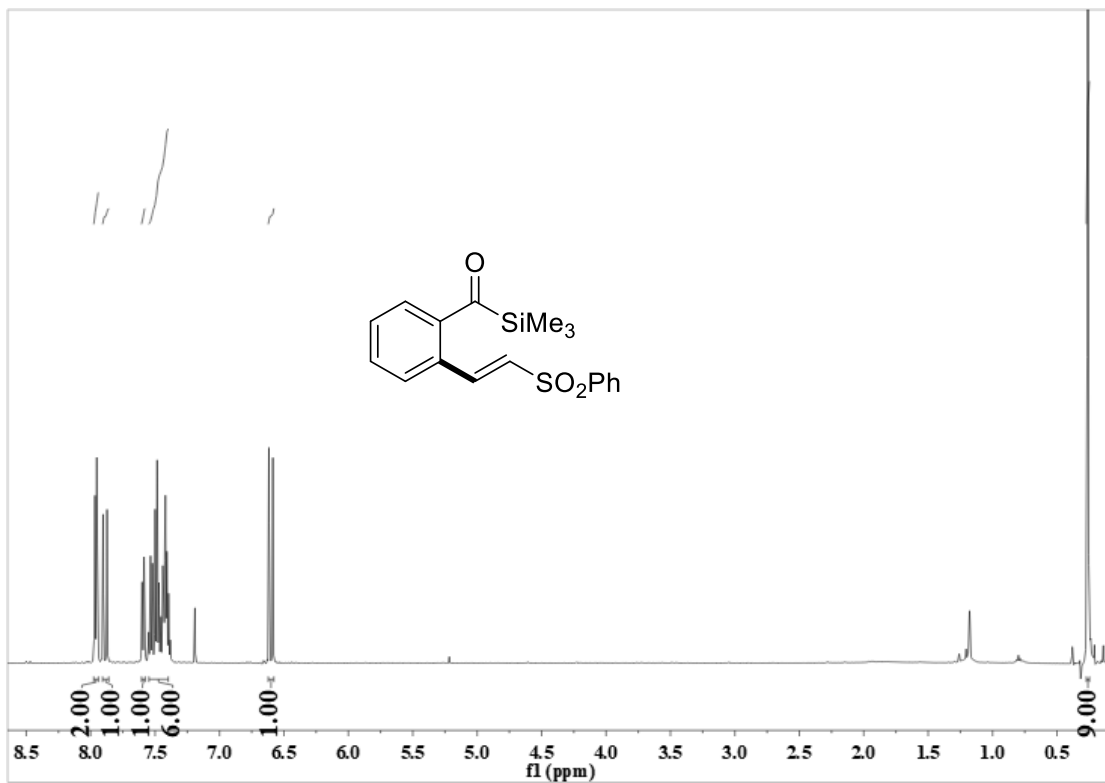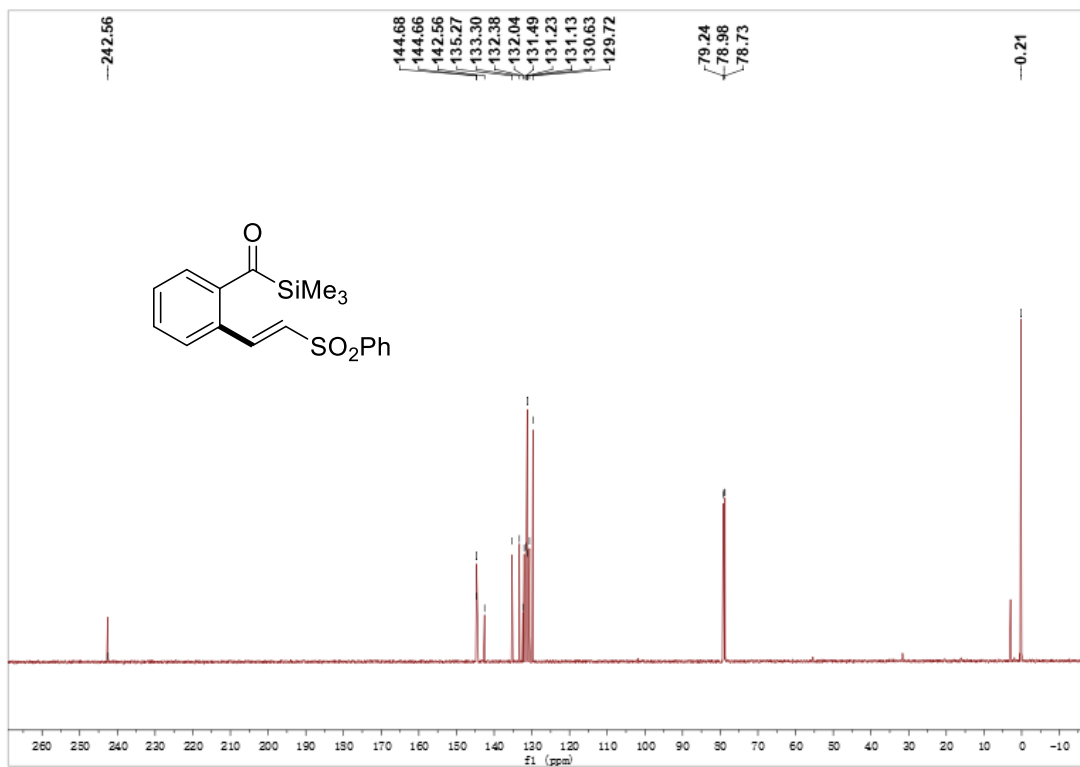

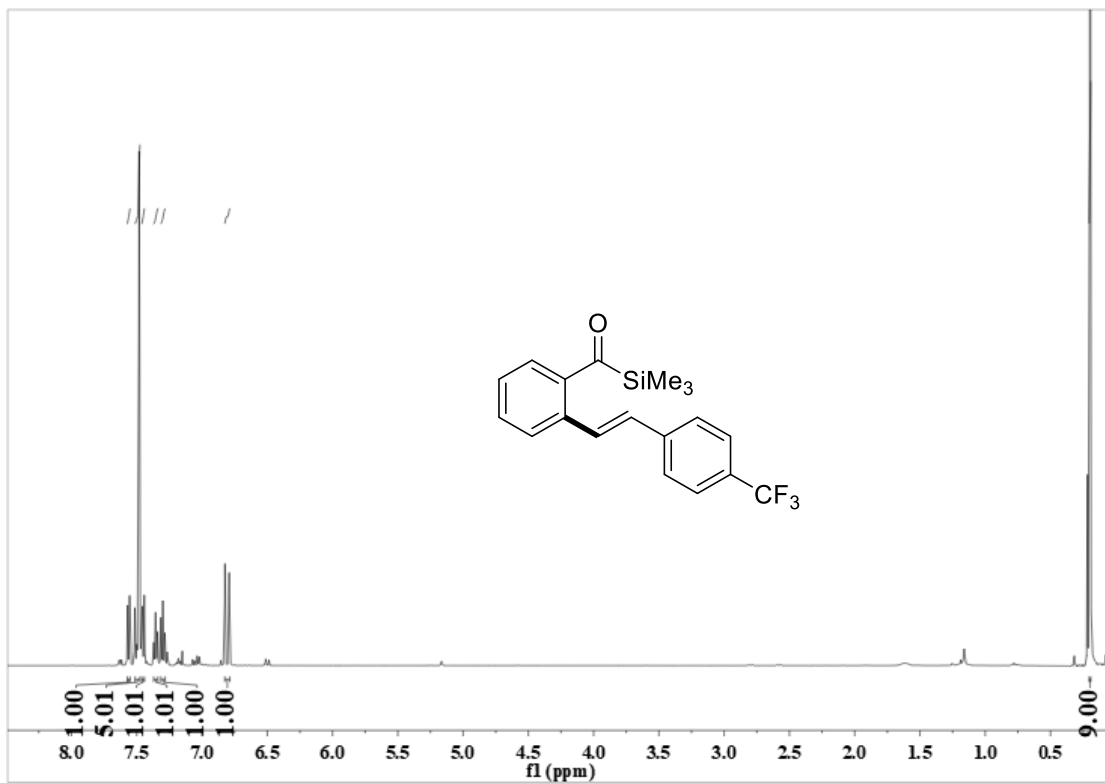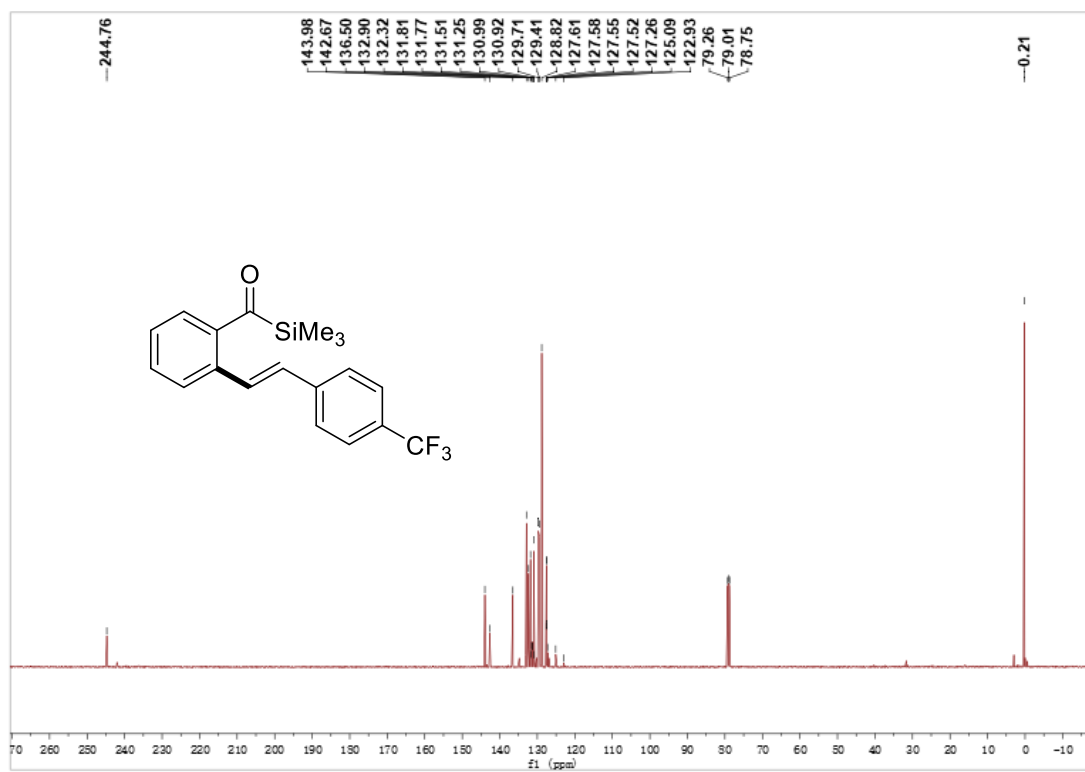



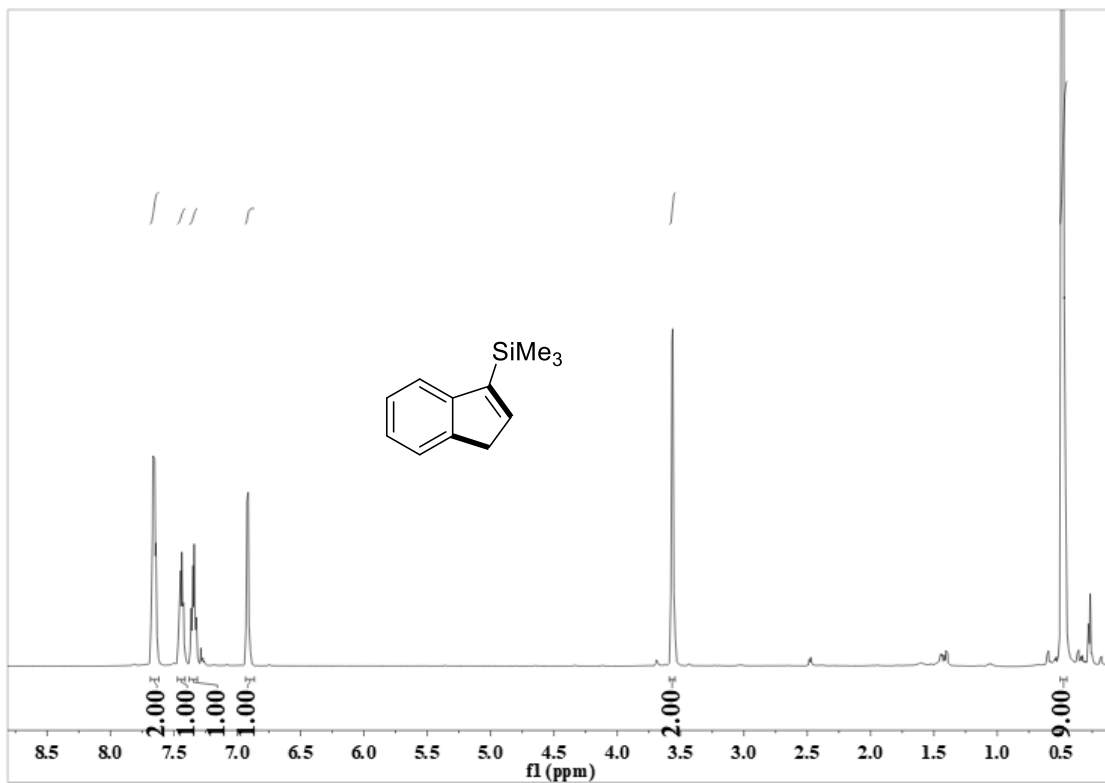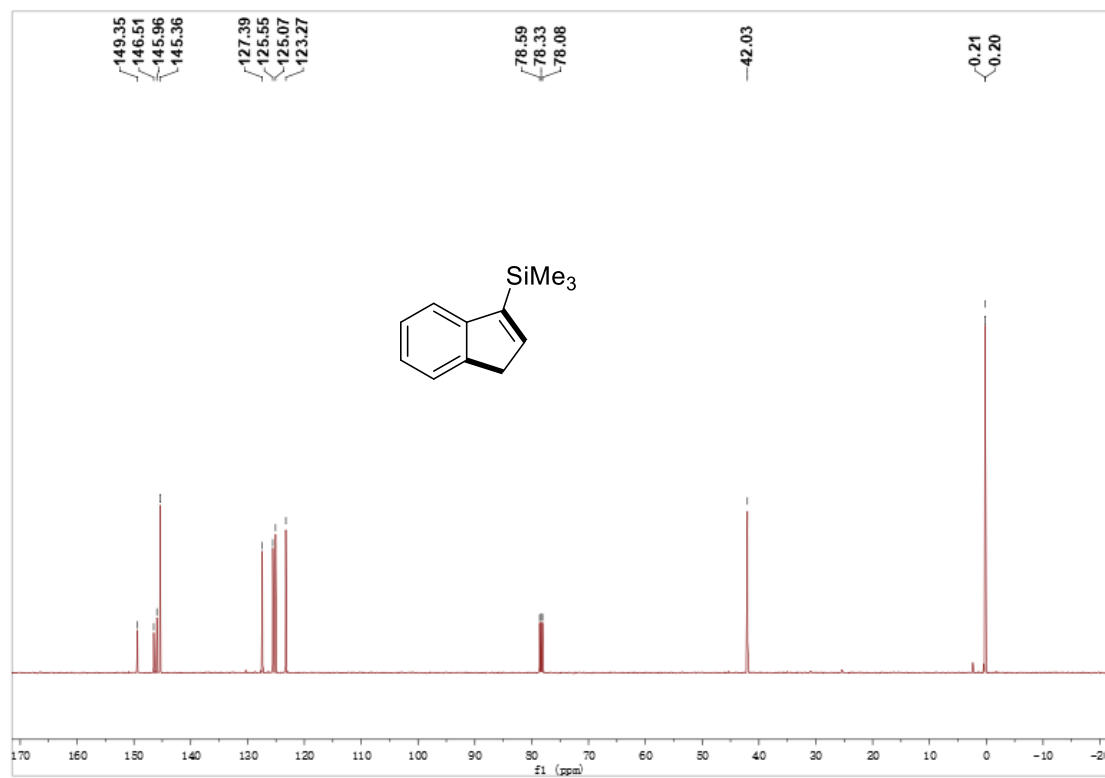

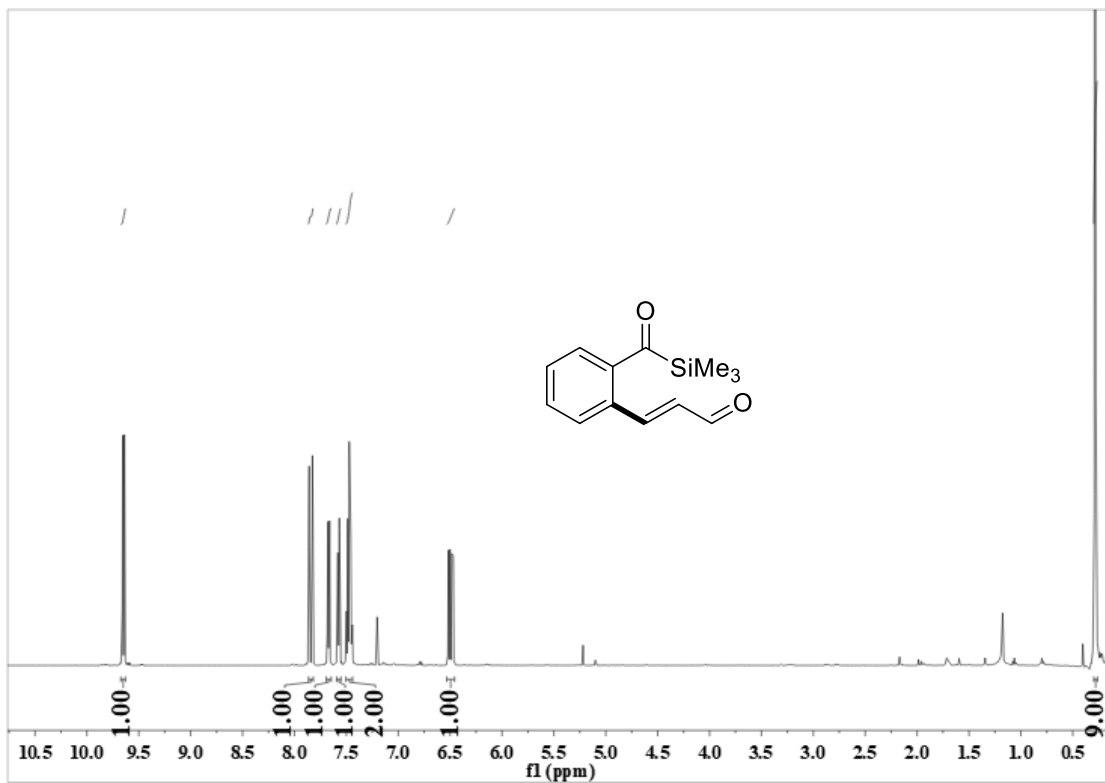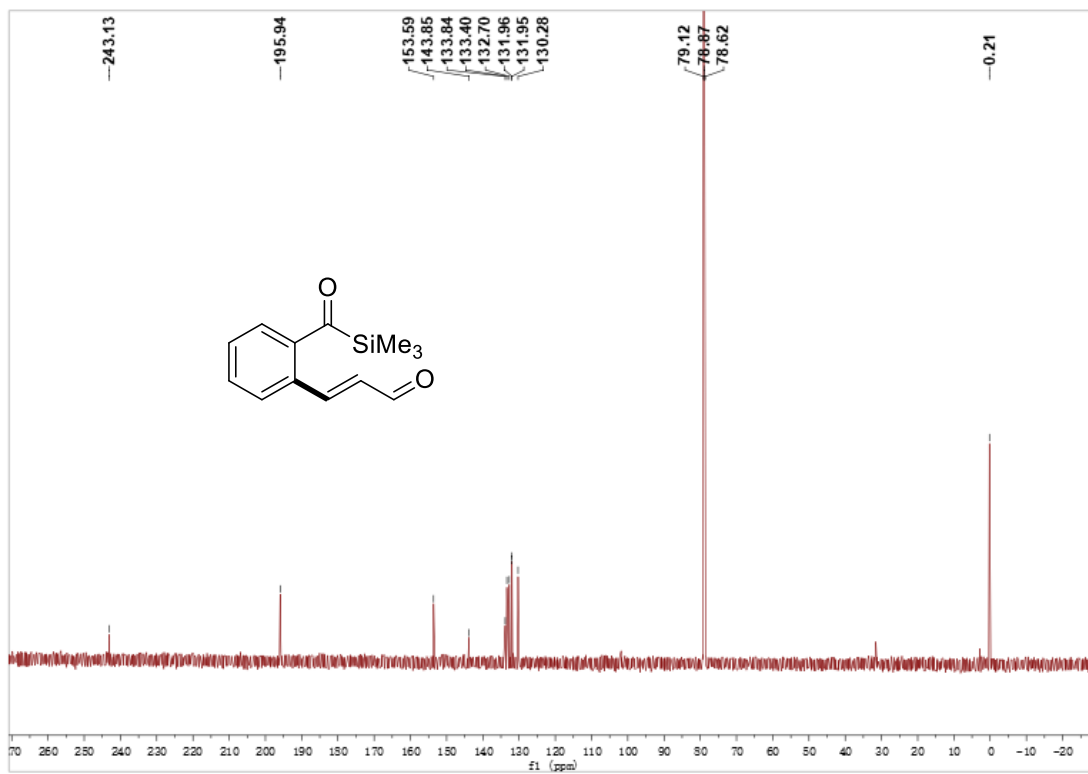

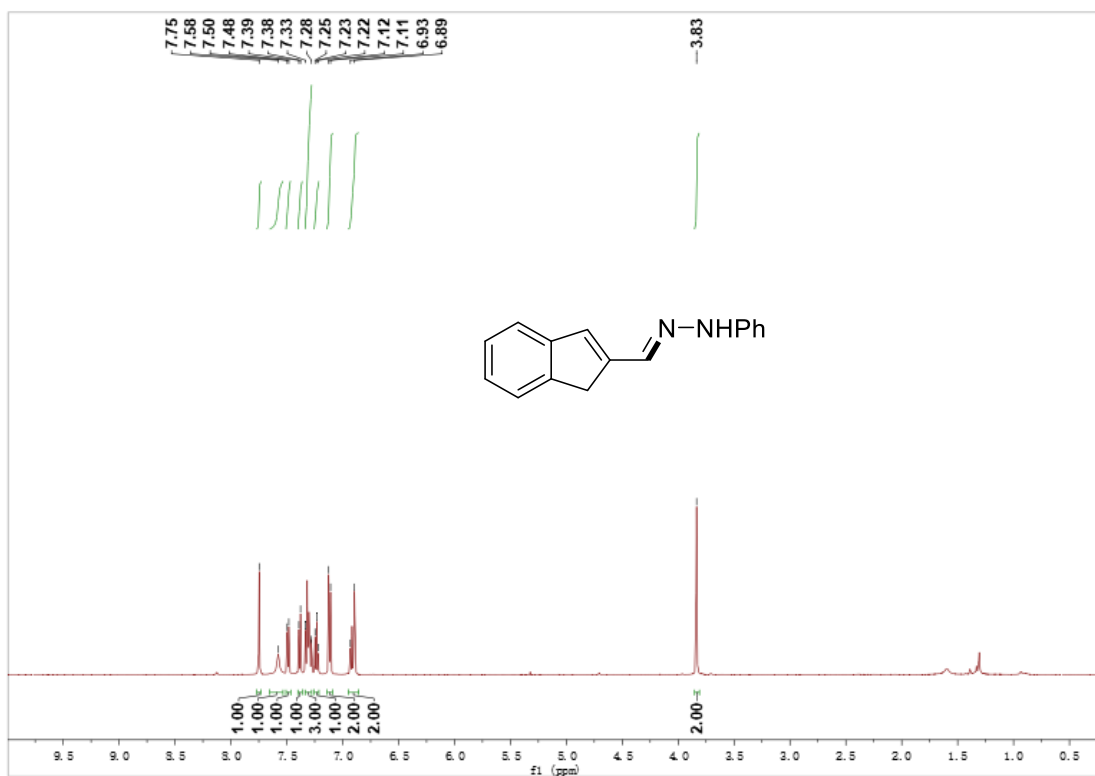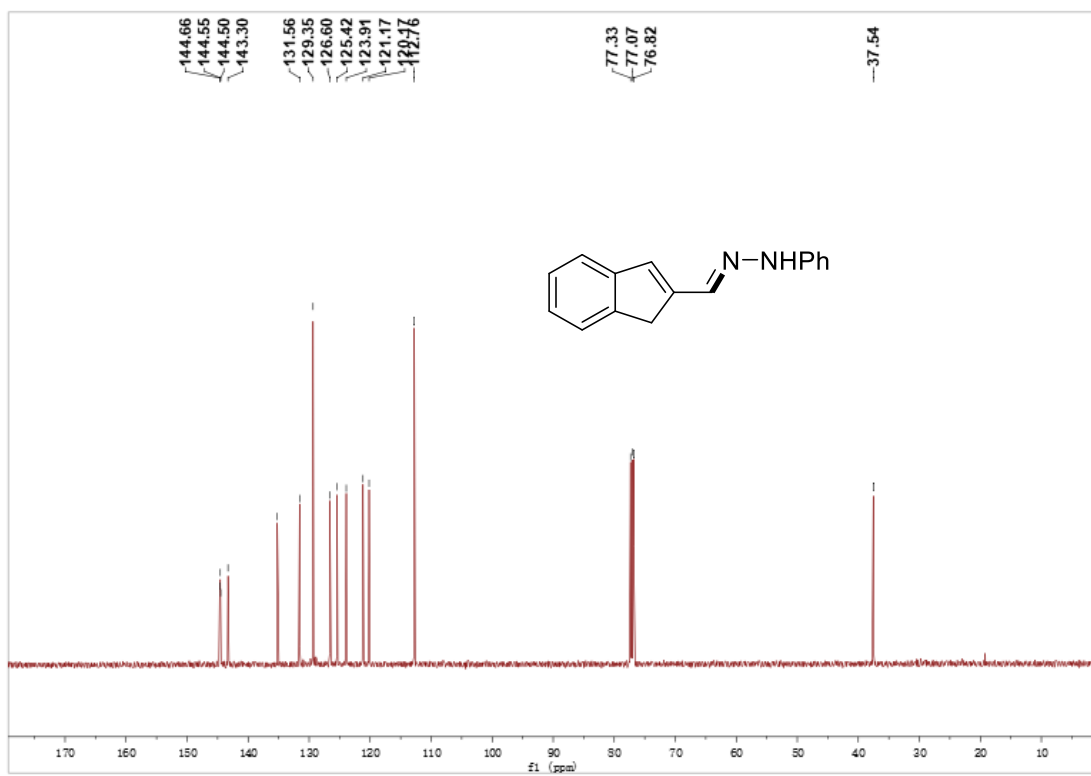

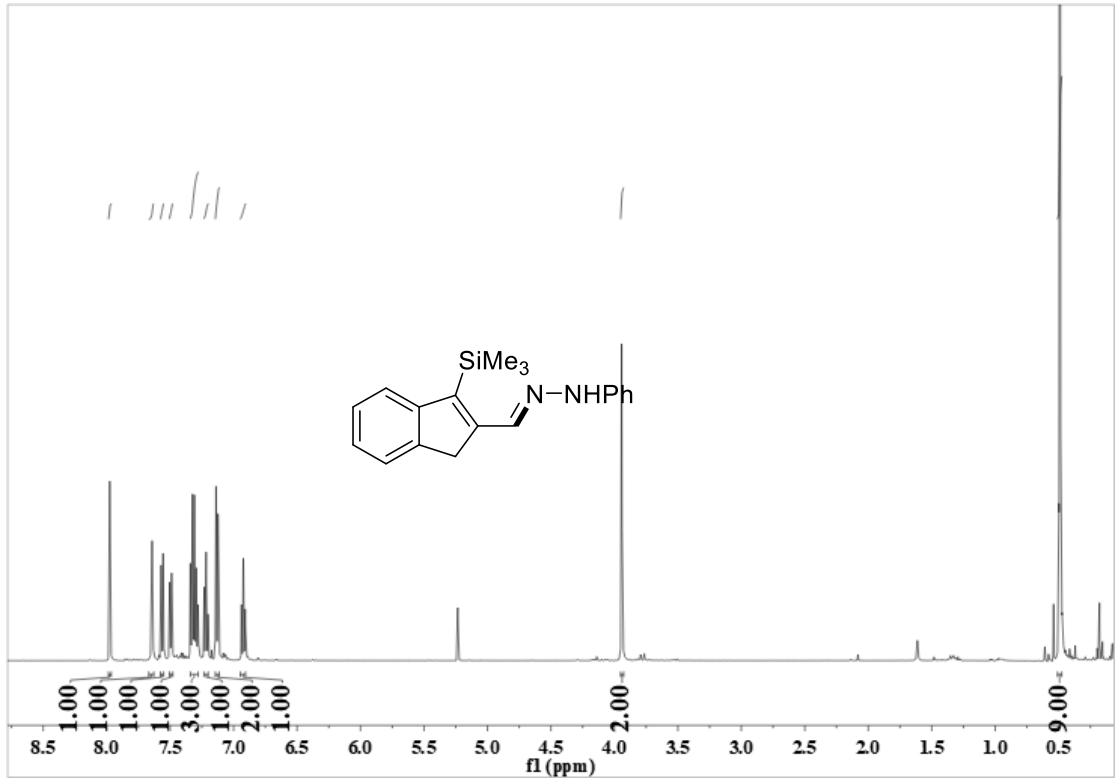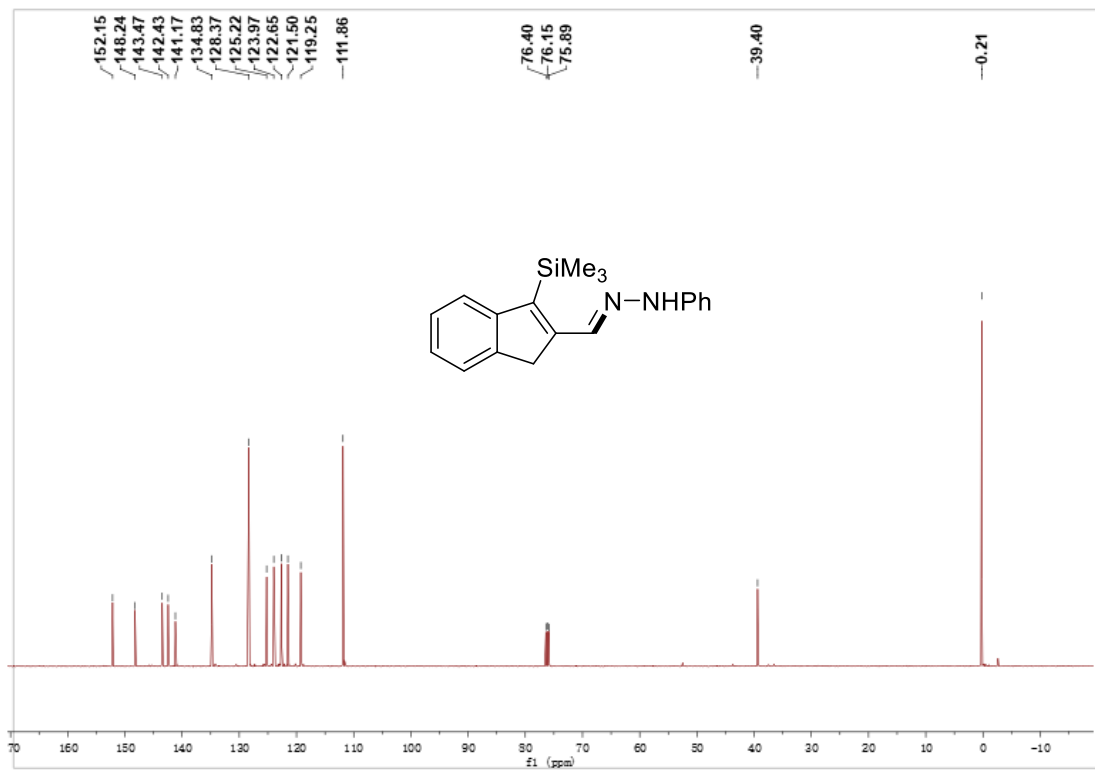

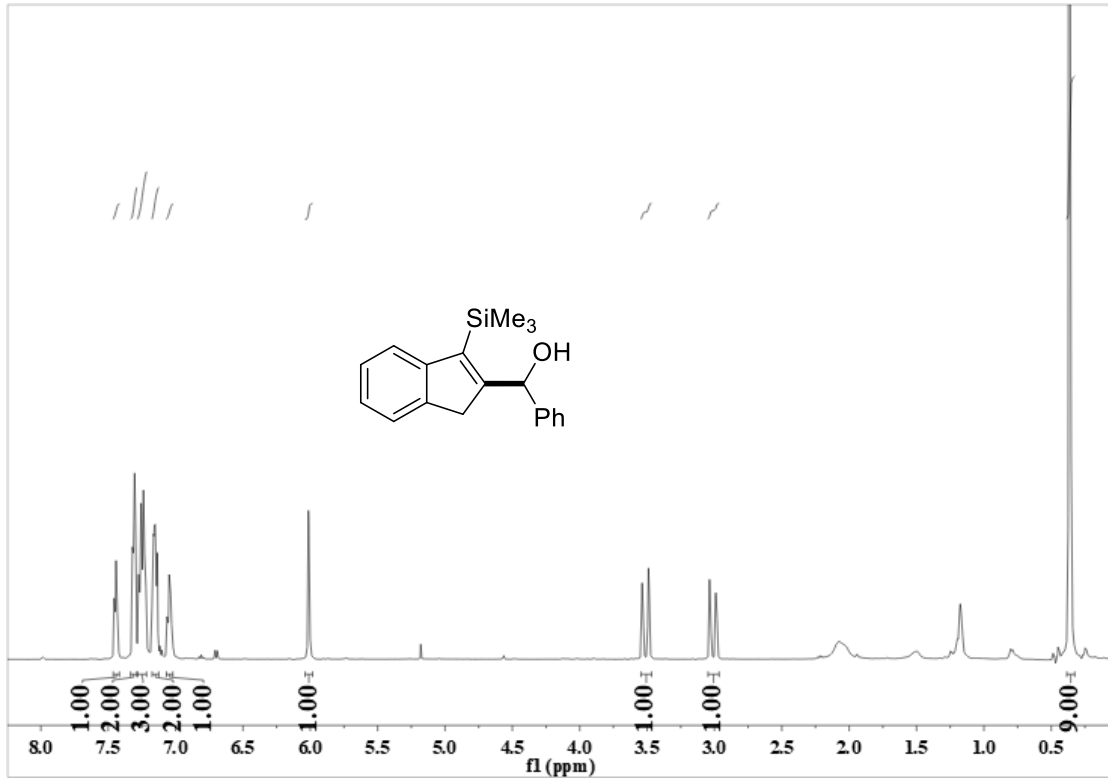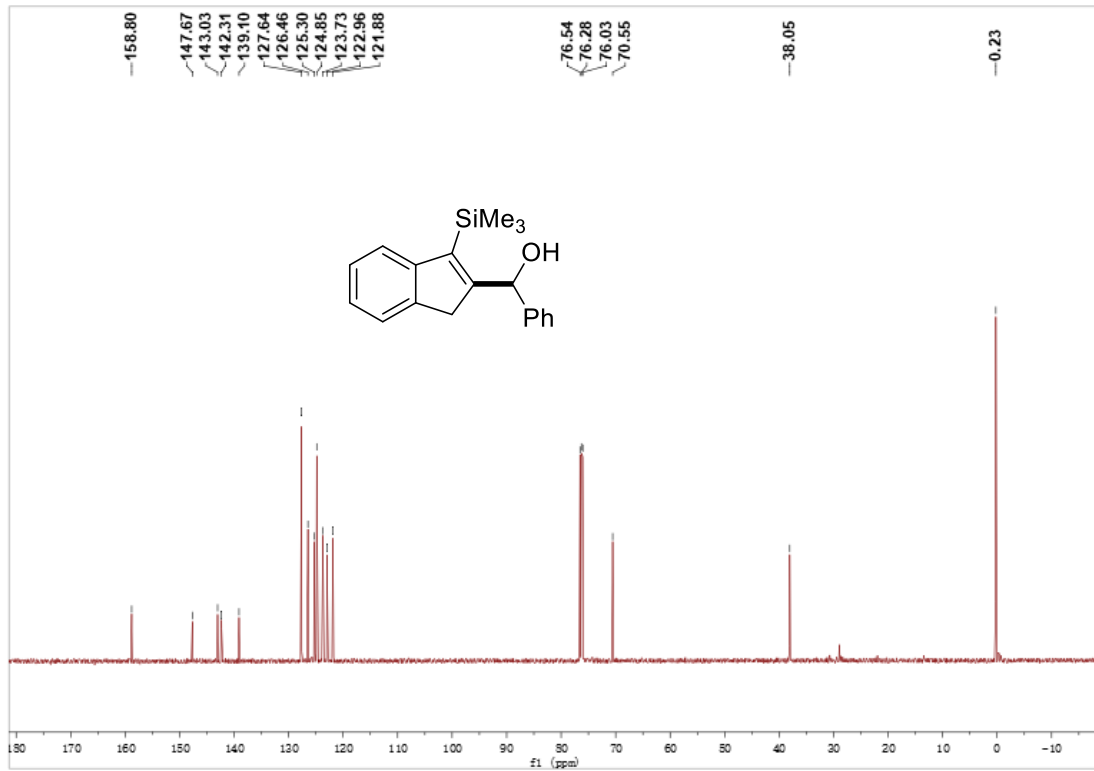

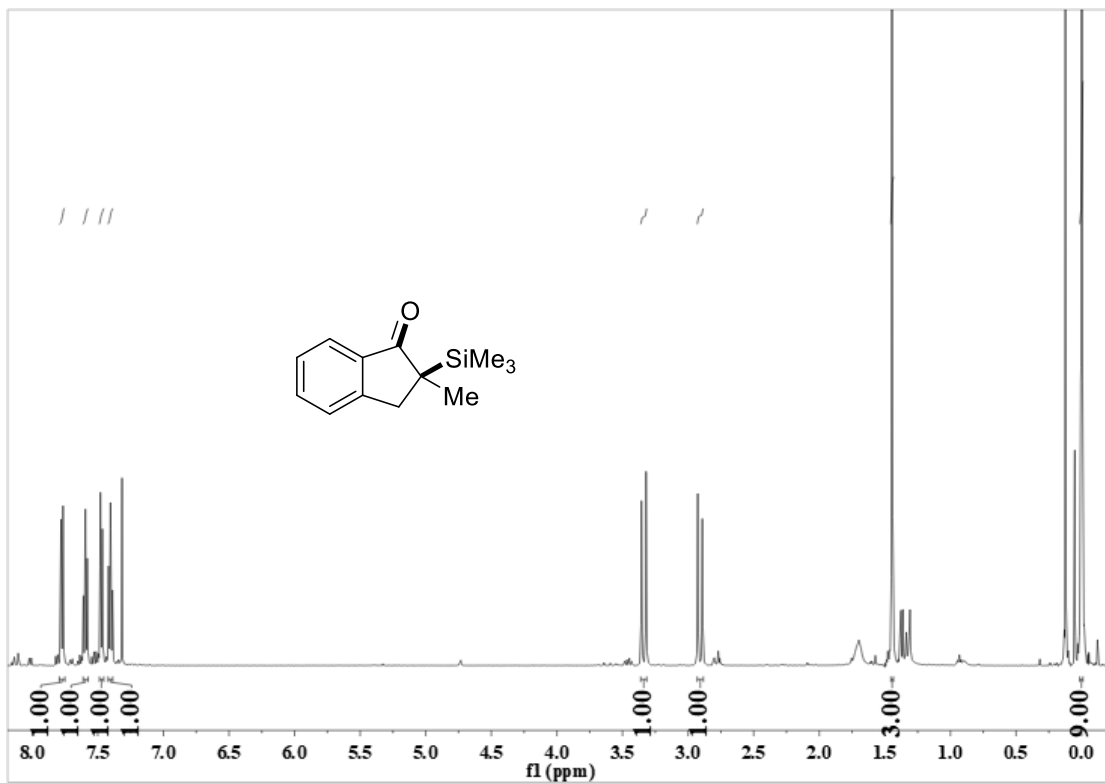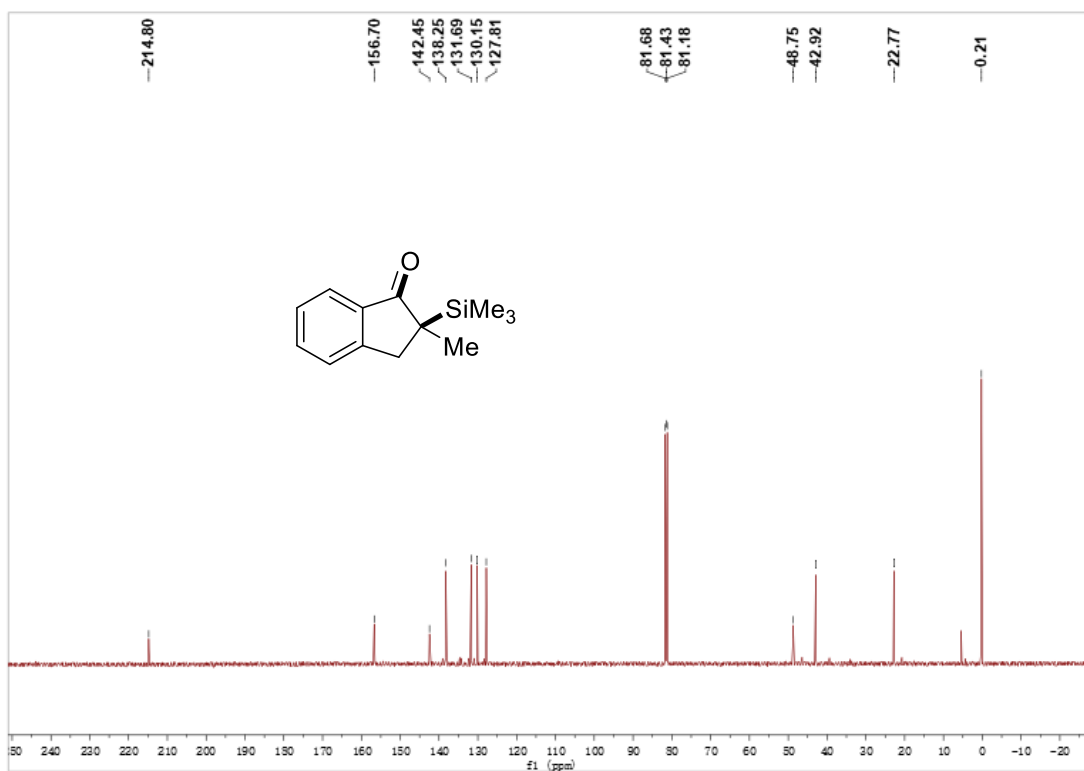

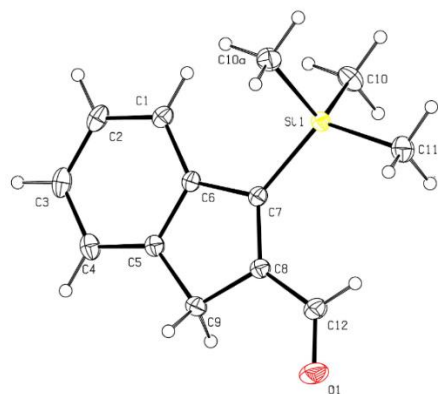

**3aa**

### **mo\_210617\_LXN\_3\_0m**

**Table 1 Crystal data and structure refinement for mo\_210617\_LXN\_3\_0m.**

|                                    |                                                               |
|------------------------------------|---------------------------------------------------------------|
| Identification code                | mo_210617_LXN_3_0m                                            |
| Empirical formula                  | C <sub>13</sub> H <sub>16</sub> O <sub>Si</sub>               |
| Formula weight                     | 216.35                                                        |
| Temperature/K                      | 170.0                                                         |
| Crystal system                     | monoclinic                                                    |
| Space group                        | P2 <sub>1</sub> /m                                            |
| a/Å                                | 8.6562(3)                                                     |
| b/Å                                | 7.0369(2)                                                     |
| c/Å                                | 9.8957(3)                                                     |
| α/°                                | 90                                                            |
| β/°                                | 97.7960(10)                                                   |
| γ/°                                | 90                                                            |
| Volume/Å <sup>3</sup>              | 597.20(3)                                                     |
| Z                                  | 2                                                             |
| ρ <sub>calc</sub> /cm <sup>3</sup> | 1.203                                                         |
| μ/mm <sup>-1</sup>                 | 0.168                                                         |
| F(000)                             | 232.0                                                         |
| Crystal size/mm <sup>3</sup>       | 0.49 × 0.35 × 0.3                                             |
| Radiation                          | MoKα (λ = 0.71073)                                            |
| 2θ range for data collection/°     | 4.75 to 54.232                                                |
| Index ranges                       | -11 ≤ h ≤ 11, -9 ≤ k ≤ 9, -12 ≤ l ≤ 12                        |
| Reflections collected              | 11768                                                         |
| Independent reflections            | 1422 [R <sub>int</sub> = 0.0304, R <sub>sigma</sub> = 0.0172] |
| Data/restraints/parameters         | 1422/0/88                                                     |
| Goodness-of-fit on F <sup>2</sup>  | 1.069                                                         |
| Final R indexes [I ≥ 2σ (I)]       | R <sub>1</sub> = 0.0338, wR <sub>2</sub> = 0.0924             |
| Final R indexes [all data]         | R <sub>1</sub> = 0.0362, wR <sub>2</sub> = 0.0947             |

Largest diff. peak/hole / e Å<sup>-3</sup> 0.21/-0.28

**Table 2 Fractional Atomic Coordinates ( $\times 10^4$ ) and Equivalent Isotropic Displacement Parameters ( $\text{\AA}^2 \times 10^3$ ) for mo\_210617\_LXN\_3\_0m.  $U_{\text{eq}}$  is defined as 1/3 of the trace of the orthogonalised  $U_{ij}$  tensor.**

| Atom | x          | y       | z          | U(eq)     |
|------|------------|---------|------------|-----------|
| Si1  | 8422.0(5)  | 2500    | 2089.8(4)  | 23.67(16) |
| O1   | 3317.7(17) | 2500    | -362.1(15) | 48.6(4)   |
| C1   | 7112(2)    | 2500    | 5185.5(17) | 26.8(4)   |
| C2   | 6508(2)    | 2500    | 6420.7(18) | 32.0(4)   |
| C3   | 4904(3)    | 2500    | 6454.7(19) | 35.0(4)   |
| C4   | 3869(2)    | 2500    | 5249.9(19) | 31.6(4)   |
| C5   | 4460(2)    | 2500    | 4020.3(17) | 24.5(3)   |
| C6   | 6073.0(19) | 2500    | 3974.6(16) | 22.3(3)   |
| C7   | 6366.5(19) | 2500    | 2535.2(16) | 22.7(3)   |
| C8   | 4940.4(19) | 2500    | 1749.9(17) | 24.4(3)   |
| C9   | 3619.8(19) | 2500    | 2595.4(18) | 26.9(4)   |
| C10  | 9368.4(15) | 4709(2) | 2845.6(15) | 36.6(3)   |
| C11  | 8589(2)    | 2500    | 231(2)     | 40.1(5)   |
| C12  | 4624(2)    | 2500    | 270.7(18)  | 33.3(4)   |

**Table 3 Anisotropic Displacement Parameters ( $\text{\AA}^2 \times 10^3$ ) for mo\_210617\_LXN\_3\_0m. The Anisotropic displacement factor exponent takes the form:  $-2\pi^2[h^2a^2U_{11}+2hka*b*U_{12}+...]$ .**

| Atom | $U_{11}$ | $U_{22}$ | $U_{33}$ | $U_{23}$ | $U_{13}$ | $U_{12}$ |
|------|----------|----------|----------|----------|----------|----------|
| Si1  | 21.8(2)  | 26.5(3)  | 23.1(3)  | 0        | 4.30(17) | 0        |
| O1   | 35.2(8)  | 77.0(12) | 30.2(7)  | 0        | -8.5(6)  | 0        |
| C1   | 31.3(9)  | 24.3(8)  | 23.8(8)  | 0        | 0.6(7)   | 0        |
| C2   | 49.5(11) | 25.0(8)  | 20.6(8)  | 0        | 1.7(7)   | 0        |
| C3   | 54.1(12) | 28.3(9)  | 25.3(9)  | 0        | 15.3(8)  | 0        |
| C4   | 35.8(10) | 28.1(9)  | 33.6(9)  | 0        | 14.8(8)  | 0        |
| C5   | 26.9(8)  | 21.1(8)  | 26.1(8)  | 0        | 5.5(6)   | 0        |
| C6   | 26.2(8)  | 19.1(7)  | 21.8(7)  | 0        | 3.7(6)   | 0        |
| C7   | 25.0(8)  | 22.2(8)  | 20.8(7)  | 0        | 2.4(6)   | 0        |
| C8   | 23.7(8)  | 25.8(8)  | 23.4(8)  | 0        | 2.0(6)   | 0        |
| C9   | 21.7(8)  | 30.1(9)  | 29.0(8)  | 0        | 3.6(6)   | 0        |



|     |          |          |         |         |         |         |
|-----|----------|----------|---------|---------|---------|---------|
| C10 | 31.3(6)  | 34.5(7)  | 44.5(7) | -5.4(6) | 7.7(5)  | -7.6(5) |
| C11 | 38.4(10) | 54.8(13) | 29.2(9) | 0       | 11.8(8) | 0       |
| C12 | 31.1(9)  | 43.8(11) | 24.0(9) | 0       | -0.3(7) | 0       |

**Table 4 Bond Lengths for mo\_210617\_LXN\_3\_0m.**

| Atom | Atom             | Length/Å   | Atom | Atom | Length/Å |
|------|------------------|------------|------|------|----------|
| Si1  | C7               | 1.8902(17) | C3   | C4   | 1.391(3) |
| Si1  | C10              | 1.8656(14) | C4   | C5   | 1.383(2) |
| Si1  | C10 <sup>1</sup> | 1.8656(14) | C5   | C6   | 1.403(2) |
| Si1  | C11              | 1.865(2)   | C5   | C9   | 1.496(2) |
| O1   | C12              | 1.216(2)   | C6   | C7   | 1.480(2) |
| C1   | C2               | 1.393(2)   | C7   | C8   | 1.367(2) |
| C1   | C6               | 1.397(2)   | C8   | C9   | 1.505(2) |
| C2   | C3               | 1.393(3)   | C8   | C12  | 1.452(2) |

<sup>1</sup>+X,1/2-Y,+Z

**Table 5 Bond Angles for mo\_210617\_LXN\_3\_0m.**

| Atom             | Atom | Atom             | Angle/°    | Atom | Atom | Atom | Angle/°    |
|------------------|------|------------------|------------|------|------|------|------------|
| C10 <sup>1</sup> | Si1  | C7               | 106.41(5)  | C6   | C5   | C9   | 109.16(14) |
| C10              | Si1  | C7               | 106.41(5)  | C1   | C6   | C5   | 120.01(16) |
| C10              | Si1  | C10 <sup>1</sup> | 112.86(9)  | C1   | C6   | C7   | 130.58(15) |
| C11              | Si1  | C7               | 115.56(8)  | C5   | C6   | C7   | 109.42(14) |
| C11              | Si1  | C10 <sup>1</sup> | 107.87(6)  | C6   | C7   | Si1  | 120.95(12) |
| C11              | Si1  | C10              | 107.87(6)  | C8   | C7   | Si1  | 132.35(13) |
| C2               | C1   | C6               | 118.53(17) | C8   | C7   | C6   | 106.70(14) |
| C3               | C2   | C1               | 121.00(17) | C7   | C8   | C9   | 112.30(15) |
| C4               | C3   | C2               | 120.51(17) | C7   | C8   | C12  | 127.27(16) |
| C5               | C4   | C3               | 118.81(17) | C12  | C8   | C9   | 120.43(15) |
| C4               | C5   | C6               | 121.14(16) | C5   | C9   | C8   | 102.42(13) |
| C4               | C5   | C9               | 129.71(16) | O1   | C12  | C8   | 123.66(18) |

<sup>1</sup>+X,1/2-Y,+Z

**Table 6 Torsion Angles for mo\_210617\_LXN\_3\_0m.**

| A   | B  | C  | D   | Angle/°    | A                | B   | C   | D   | Angle/°    |
|-----|----|----|-----|------------|------------------|-----|-----|-----|------------|
| Si1 | C7 | C8 | C9  | 180.000(0) | C6               | C5  | C9  | C8  | 0.000(0)   |
| Si1 | C7 | C8 | C12 | 0.000(0)   | C6               | C7  | C8  | C9  | 0.000(0)   |
| C1  | C2 | C3 | C4  | 0.000(1)   | C6               | C7  | C8  | C12 | 180.000(0) |
| C1  | C6 | C7 | Si1 | 0.000(0)   | C7               | C8  | C9  | C5  | 0.000(0)   |
| C1  | C6 | C7 | C8  | 180.000(0) | C7               | C8  | C12 | O1  | 180.000(0) |
| C2  | C1 | C6 | C5  | 0.000(0)   | C9               | C5  | C6  | C1  | 180.000(0) |
| C2  | C1 | C6 | C7  | 180.000(0) | C9               | C5  | C6  | C7  | 0.000(0)   |
| C2  | C3 | C4 | C5  | 0.000(1)   | C9               | C8  | C12 | O1  | 0.000(0)   |
| C3  | C4 | C5 | C6  | 0.000(1)   | C10 <sup>1</sup> | Si1 | C7  | C6  | 60.29(5)   |
| C3  | C4 | C5 | C9  | 180.000(0) | C10              | Si1 | C7  | C6  | -60.29(5)  |
| C4  | C5 | C6 | C1  | 0.000(0)   | C10 <sup>1</sup> | Si1 | C7  | C8  | -119.71(5) |
| C4  | C5 | C6 | C7  | 180.000(0) | C10              | Si1 | C7  | C8  | 119.71(5)  |
| C4  | C5 | C9 | C8  | 180.000(0) | C11              | Si1 | C7  | C6  | 180.000(0) |
| C5  | C6 | C7 | Si1 | 180.000(0) | C11              | Si1 | C7  | C8  | 0.000(0)   |
| C5  | C6 | C7 | C8  | 0.000(0)   | C12              | C8  | C9  | C5  | 180.000(0) |
| C6  | C1 | C2 | C3  | 0.000(1)   |                  |     |     |     |            |

<sup>1</sup>+X,1/2-Y,+Z

**Table 7 Hydrogen Atom Coordinates ( $\text{\AA}\times 10^4$ ) and Isotropic Displacement Parameters ( $\text{\AA}^2\times 10^3$ ) for mo\_210617\_LXN\_3\_0m.**

| Atom | x        | y       | z       | U(eq) |
|------|----------|---------|---------|-------|
| H1   | 8206.73  | 2500    | 5166.85 | 32    |
| H2   | 7200.08  | 2500    | 7252.44 | 38    |
| H3   | 4515.12  | 2500    | 7307.3  | 42    |
| H4   | 2774.87  | 2500    | 5271.71 | 38    |
| H9A  | 2961.09  | 3646.64 | 2416.55 | 32    |
| H9B  | 2961.09  | 1353.36 | 2416.54 | 32    |
| H10A | 9296     | 4742.95 | 3825.06 | 55    |
| H10B | 10467.54 | 4722.58 | 2705.4  | 55    |
| H10C | 8838.75  | 5821.71 | 2403.39 | 55    |
| H11A | 8099.17  | 1350.52 | -191.38 | 60    |
| H11B | 8063.5   | 3624.3  | -197.99 | 60    |
| H11C | 9692.29  | 2525.18 | 104.02  | 60    |
| H12  | 5485.36  | 2500    | -230.49 | 40    |

**Table 8 Atomic Occupancy for mo\_210617\_LXN\_3\_0m.**

| Atom | Occupancy | Atom | Occupancy | Atom | Occupancy |
|------|-----------|------|-----------|------|-----------|
| H9A  | 0.5       | H9B  | 0.5       | H11A | 0.5       |
| H11B | 0.5       | H11C | 0.5       |      |           |

### Experimental

Single crystals of C<sub>13</sub>H<sub>16</sub>OSi [**mo\_210617\_LXN\_3\_0m**] were [ ]. A suitable crystal was selected and [ ] on a 'Bruker APEX-II CCD' diffractometer. The crystal was kept at 170.0 K during data collection. Using Olex2 [1], the structure was solved with the ShelXT [2] structure solution program using Intrinsic Phasing and refined with the ShelXL [3] refinement package using Least Squares minimisation.

1. Dolomanov, O.V., Bourhis, L.J., Gildea, R.J., Howard, J.A.K. & Puschmann, H. (2009), *J. Appl. Cryst.* 42, 339-341.
2. Sheldrick, G.M. (2015). *Acta Cryst.* A71, 3-8.
3. Sheldrick, G.M. (2015). *Acta Cryst.* C71, 3-8.

### Crystal structure determination of [mo\_210617\_LXN\_3\_0m]

**Crystal Data** for C<sub>13</sub>H<sub>16</sub>OSi ( $M = 216.35$  g/mol): monoclinic, space group P2<sub>1</sub>/m (no. 11),  $a = 8.6562(3)$  Å,  $b = 7.0369(2)$  Å,  $c = 9.8957(3)$  Å,  $\beta = 97.7960(10)^\circ$ ,  $V = 597.20(3)$  Å<sup>3</sup>,  $Z = 2$ ,  $T = 170.0$  K,  $\mu(\text{MoK}\alpha) = 0.168$  mm<sup>-1</sup>,  $D_{\text{calc}} = 1.203$  g/cm<sup>3</sup>, 11768 reflections measured ( $4.75^\circ \leq 2\theta \leq 54.232^\circ$ ), 1422 unique ( $R_{\text{int}} = 0.0304$ ,  $R_{\text{sigma}} = 0.0172$ ) which were used in all calculations. The final  $R_1$  was 0.0338 ( $I > 2\sigma(I)$ ) and  $wR_2$  was 0.0947 (all data).

### Refinement model description

Number of restraints - 0, number of constraints - unknown.

Details:

1. Fixed Uiso

At 1.2 times of:

All C(H) groups, All C(H,H) groups

At 1.5 times of:

All C(H,H,H) groups

2. Others

Fixed Sof: H9A(0.5) H9B(0.5) H11A(0.5) H11B(0.5) H11C(0.5)

3.a Secondary CH2 refined with riding coordinates:

C9(H9A,H9B)

3.b Me refined with riding coordinates:

C10(H10A,H10B,H10C), C11(H11A,H11B,H11C)

3.c Aromatic/amide H refined with riding coordinates:

C1(H1), C2(H2), C3(H3), C4(H4), C12(H12)

This report has been created with Olex2, compiled on 2018.05.29 svn.r3508 for OlexSys. Please let us know if there are any errors or if you would like to have additional features.
